# Supplementary material for: Electromagnetic mill promoted mechanochemical palladium-catalyzed solid state cyanation of aryl bromides using non-toxic K4[Fe(CN)6]
Source: Royal Society of Chemistry journal article supplement (doi:10.1039/d2gc04506k), 2023-01-01

## Supporting Information

### **Electromagnetic Mill Promoted Mechanochemical Palladium-catalyzed Solid State Cyanidation of Aryl Bromides Using Non-toxic $K_4[Fe(CN)_6]$**

Yanan Hou<sup>†,a</sup>, Hui Wang<sup>†,a,b</sup>, Juan Xi<sup>a</sup>, Ruonan Jiang<sup>a</sup>, Lizhi Zhang<sup>a</sup>, Xinjin Li<sup>a</sup>, Fenggang Sun<sup>a</sup>, Qing Liu<sup>a,\*</sup>,  
Zengdian Zhao<sup>a,\*</sup> and Hui Liu<sup>a,\*</sup>

---

## Table of contents

|                                                                                |    |
|--------------------------------------------------------------------------------|----|
| 1. General Information.....                                                    | 3  |
| 2. Optimization of the reaction conditions .....                               | 4  |
| 3. General procedure for Palladium-catalyzed Cyanidation of Aryl Bromides..... | 5  |
| 4. Ferromagnetic rods of different specifications .....                        | 8  |
| 5. SEM-EDS data analysis of ferromagnetic rod (0.35*0.5mm) .....               | 8  |
| 6. SEM analysis for crude product and Mapping images of palladium. ....        | 10 |
| 7. Temperature for different reaction times.....                               | 11 |
| 8. Characterization of Obtained Products.....                                  | 12 |
| 9. References.....                                                             | 22 |
| 10. Copies of the <sup>1</sup> H NMR, <sup>13</sup> C NMR .....                | 23 |

---

## 1. General Information

The starting materials were obtained from commercial suppliers and used as received. The ferromagnetic rod used is SUS304 stainless steel, which is purchased from Donghuan Feiada Metal Co., Ltd. and then processed by ourselves. Solvents were purchased from commercial suppliers. Purifications of reactions products were carried out by flash chromatography using Merck silica gel (40-63  $\mu\text{m}$ ). All mechanochemical reactions were carried out using grinding vessels in a Magnetic grinding machine. The reaction bottles used were commercially available 10 ml flat bottom flask. The grinding medium is customized ferromagnetic rods.  $^1\text{H}$  NMR (400 MHz),  $^{13}\text{C}$  NMR (100 MHz) were measured on a Bruker Avance 400 MHz spectrometer. Chemical shifts are reported in parts per million (ppm,  $\delta$ ) downfield from residual solvents peaks and coupling constants are reported as Hertz (Hz). Splitting patterns are designated as singlet (s), doublet (d), triplet (t), .... Splitting patterns that could not be interpreted or easily visualized are designated as multiplet (m). Electrospray mass spectra were obtained using an ESI/TOF Mariner Mass Spectrometer. Unless otherwise noted, all other commercially available reagents and solvents were used without further purification.

About the magnetic grinding used: The magnetic grinding machine (Figure S1) is self-developed and has not yet been put into commercial use, The magnetic field strength is about 0.2T.

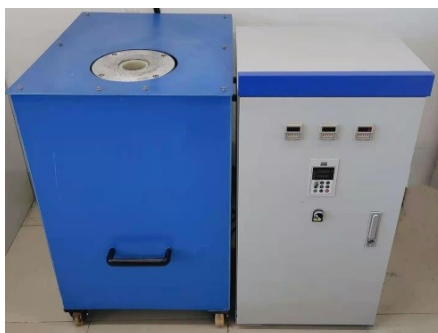

**Figure S1.** Magnetic Grinding equipment

## 2. Optimization of the reaction conditions

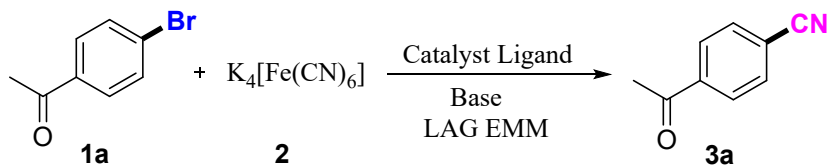

| entry                   | catalyst                                           | ligand                               | base                                | LAG                | yield(%) <sup>a</sup> |
|-------------------------|----------------------------------------------------|--------------------------------------|-------------------------------------|--------------------|-----------------------|
| 1                       | Pd(OAc) <sub>2</sub>                               | DPPF                                 | Na <sub>2</sub> CO <sub>3</sub>     | ---                | 39                    |
| 2                       | Pd <sub>2</sub> (dba) <sub>3</sub>                 | DPPF                                 | Na <sub>2</sub> CO <sub>3</sub>     | ---                | trace                 |
| 3                       | Pd(PPh <sub>3</sub> ) <sub>4</sub>                 | DPPF                                 | Na <sub>2</sub> CO <sub>3</sub>     | ---                | 27                    |
| 4                       | PdCl <sub>2</sub> (pcy <sub>3</sub> ) <sub>2</sub> | DPPF                                 | Na <sub>2</sub> CO <sub>3</sub>     | ---                | trace                 |
| 5                       | Pd(dba) <sub>2</sub>                               | DPPF                                 | Na <sub>2</sub> CO <sub>3</sub>     | ---                | trace                 |
| 6                       | PdCl <sub>2</sub> (dppf)                           | DPPF                                 | Na <sub>2</sub> CO <sub>3</sub>     | ---                | trace                 |
| 7                       | Pd(OAc) <sub>2</sub>                               | DPPE                                 | Na <sub>2</sub> CO <sub>3</sub>     | ---                | trace                 |
| 8                       | Pd(OAc) <sub>2</sub>                               | Xantphos                             | Na <sub>2</sub> CO <sub>3</sub>     | ---                | 50                    |
| 9                       | Pd(OAc) <sub>2</sub>                               | DPCP                                 | Na <sub>2</sub> CO <sub>3</sub>     | ---                | ---                   |
| 10                      | Pd(OAc) <sub>2</sub>                               | Bis(2-diphenylphosphino)phenyl)ether | Na <sub>2</sub> CO <sub>3</sub>     | ---                | trace                 |
| 11                      | Pd(OAc) <sub>2</sub>                               | TXP-2,4                              | Na <sub>2</sub> CO <sub>3</sub>     | ---                | trace                 |
| 12                      | Pd(OAc) <sub>2</sub>                               | DPPP                                 | Na <sub>2</sub> CO <sub>3</sub>     | ---                | trace                 |
| 13                      | Pd(OAc) <sub>2</sub>                               | PhDavePhos                           | Na <sub>2</sub> CO <sub>3</sub>     | ---                | 17                    |
| 14                      | Pd(OAc) <sub>2</sub>                               | DPPM                                 | Na <sub>2</sub> CO <sub>3</sub>     | ---                | trace                 |
| 15                      | Pd(OAc) <sub>2</sub>                               | DCyPFc                               | Na <sub>2</sub> CO <sub>3</sub>     | ---                | 12                    |
| 16                      | Pd(OAc) <sub>2</sub>                               | Xphos                                | Na <sub>2</sub> CO <sub>3</sub>     | ---                | 34                    |
| 17                      | Pd(OAc) <sub>2</sub>                               | Xantphos                             | Na <sub>2</sub> CO <sub>3</sub>     | DMF                | 37                    |
| 18                      | Pd(OAc) <sub>2</sub>                               | Xantphos                             | Na <sub>2</sub> CO <sub>3</sub>     | MeCN               | 45                    |
| 19                      | Pd(OAc) <sub>2</sub>                               | Xantphos                             | Na <sub>2</sub> CO <sub>3</sub>     | 1,4-dioxane        | 58                    |
| 20                      | Pd(OAc) <sub>2</sub>                               | Xantphos                             | Na <sub>2</sub> CO <sub>3</sub>     | DMSO               | 34                    |
| 21                      | Pd(OAc) <sub>2</sub>                               | Xantphos                             | Na <sub>2</sub> CO <sub>3</sub>     | Toluene            | 45                    |
| 22                      | Pd(OAc) <sub>2</sub>                               | Xantphos                             | Na <sub>2</sub> CO <sub>3</sub>     | Methanol           | 45                    |
| 23                      | Pd(OAc) <sub>2</sub>                               | Xantphos                             | Na <sub>2</sub> CO <sub>3</sub>     | Acetone            | 51                    |
| 24                      | Pd(OAc) <sub>2</sub>                               | Xantphos                             | Na <sub>2</sub> CO <sub>3</sub>     | NMP                | 20                    |
| 25                      | Pd(OAc) <sub>2</sub>                               | Xantphos                             | Cs <sub>2</sub> CO <sub>3</sub>     | 1,4-dioxane        | trace                 |
| 26                      | Pd(OAc) <sub>2</sub>                               | Xantphos                             | Et <sub>3</sub> N                   | 1,4-dioxane        | trace                 |
| 27                      | Pd(OAc) <sub>2</sub>                               | Xantphos                             | KOH                                 | 1,4-dioxane        | ---                   |
| 28                      | Pd(OAc) <sub>2</sub>                               | Xantphos                             | CsF                                 | 1,4-dioxane        | trace                 |
| 29 <sup>[b]</sup>       | Pd(OAc) <sub>2</sub>                               | Xantphos                             | Na <sub>2</sub> CO <sub>3</sub>     | 1,4-dioxane        | 45                    |
| 30 <sup>[c]</sup>       | Pd(OAc) <sub>2</sub>                               | Xantphos                             | Na <sub>2</sub> CO <sub>3</sub>     | 1,4-dioxane        | 68                    |
| 31 <sup>[d]</sup>       | Pd(OAc) <sub>2</sub>                               | Xantphos                             | Na <sub>2</sub> CO <sub>3</sub>     | 1,4-dioxane        | 54                    |
| <b>32<sup>[e]</sup></b> | <b>Pd(OAc)<sub>2</sub></b>                         | <b>Xantphos</b>                      | <b>Na<sub>2</sub>CO<sub>3</sub></b> | <b>1,4-dioxane</b> | <b>84</b>             |
| 33 <sup>[f]</sup>       | Pd(OAc) <sub>2</sub>                               | Xantphos                             | Na <sub>2</sub> CO <sub>3</sub>     | 1,4-dioxane        | 35                    |

Reaction conditions: **1a** (1 mmol), **2** (0.3 mmol), catalyst (0.015 mmol), ligand (0.0225 mmol), base (1 mmol), LAG (0.2 mL), in a flat bottom flask (10 mL) with ferromagnetic rods (0.3 mm×15 mm, 4 g), EMM, 50 Hz, 3 h. TXP-2,4 = Tris(2,4-dimethylphenyl)phosphine, DCyPFc = 1,1'-Bis(dicyclohexylphosphino)-ferrocene.

DPCP=cyclohexyldiphenylphosphine

[a] Isolated yields. [b] ferromagnetic rods (0.5 mm×10 mm). [c] ferromagnetic rods (0.3 mm×15 mm). [d] ferromagnetic rods (1.0 mm×5 mm). [e] Pd(OAc)<sub>2</sub> (1.0 mol%). [f] Pd(OAc)<sub>2</sub> (0.5 mol%).

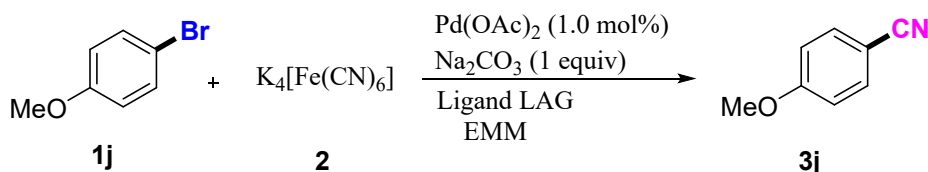

| entry    | catalyst                   | ligand       | base                                | LAG             | yield(%) <sup>a</sup> |
|----------|----------------------------|--------------|-------------------------------------|-----------------|-----------------------|
| 1        | Pd(OAc) <sub>2</sub>       | Xantphos     | Na <sub>2</sub> CO <sub>3</sub>     | 1,4-dioxane     | ---                   |
| 2        | Pd(OAc) <sub>2</sub>       | DPPF         | Na <sub>2</sub> CO <sub>3</sub>     | 1,4-dioxane     | 45                    |
| 3        | Pd(OAc) <sub>2</sub>       | DPPM         | Na <sub>2</sub> CO <sub>3</sub>     | 1,4-dioxane     | 45                    |
| 4        | Pd(OAc) <sub>2</sub>       | DTBPF        | Na <sub>2</sub> CO <sub>3</sub>     | 1,4-dioxane     | 61                    |
| 5        | Pd(OAc) <sub>2</sub>       | DCyPFc       | Na <sub>2</sub> CO <sub>3</sub>     | 1,4-dioxane     | ---                   |
| 6        | Pd(OAc) <sub>2</sub>       | DTBPF        | Na <sub>2</sub> CO <sub>3</sub>     | DMA             | 59                    |
| 7        | Pd(OAc) <sub>2</sub>       | DTBPF        | Na <sub>2</sub> CO <sub>3</sub>     | DMF             | ---                   |
| <b>8</b> | <b>Pd(OAc)<sub>2</sub></b> | <b>DTBPF</b> | <b>Na<sub>2</sub>CO<sub>3</sub></b> | <b>Methanol</b> | <b>87</b>             |
| 9        | Pd(OAc) <sub>2</sub>       | DTBPF        | Na <sub>2</sub> CO <sub>3</sub>     | MeCN            | 68                    |
| 10       | Pd(OAc) <sub>2</sub>       | DTBPF        | Na <sub>2</sub> CO <sub>3</sub>     | Acetone         | ---                   |
| 11       | Pd(OAc) <sub>2</sub>       | DTBPF        | Na <sub>2</sub> CO <sub>3</sub>     | Toluene         | 54                    |
| 12       | Pd(OAc) <sub>2</sub>       | DTBPF        | Na <sub>2</sub> CO <sub>3</sub>     | DMSO            | ---                   |

Reaction conditions: 1j (1 mmol), 2 (0.3 mmol), Pd(OAc)<sub>2</sub> (0.01 mmol), ligand (0.015 mmol), Na<sub>2</sub>CO<sub>3</sub> (1 mmol), LAG (0.2 mL), in a flat bottom flask (10 mL) with ferromagnetic rods (0.3 mm×15 mm, 4 g), EMM, 50 Hz, 3 h. [a] Isolated yields. DCyPFc=1,1'-Bis(dicyclohexylphosphino)ferrocene DTBPF=1,1'-bis(di-tert-butylphosphino)ferrocene.

### 3. General procedure for Palladium-catalyzed Cyanidation of Aryl Bromides

#### 1) Procedure I: Pd-catalyzed cyanidation reaction of 4-bromoacetophenone under EMM.

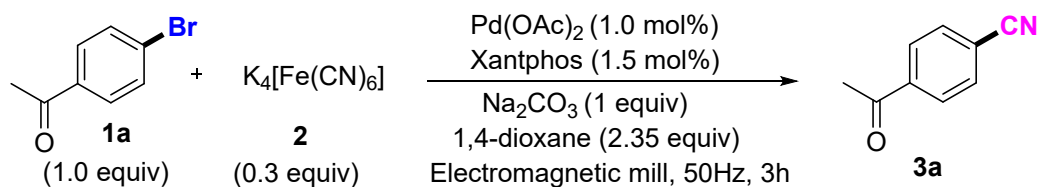

Aryl halide **1a** (199.04 mg, 1 mmol 1.0 equiv), K<sub>4</sub>[Fe(CN)<sub>6</sub>] **2** (110.5 mg, 0.3 mmol, 0.3 equiv), Pd(OAc)<sub>2</sub> (2.2 mg, 0.01 mmol) and Xantphos (8.68 mg, 0.015 mmol), Na<sub>2</sub>CO<sub>3</sub> (106.0 mg, 1 mmol 1.0 equiv), 1,4-dioxane (0.2 mL, 2.35 equiv), ferromagnetic rods 4 g (a diameter of 0.3 mm and a length of 15 mm) were placed in a flat bottom

flask. Put it in magnetic grinder. After 3 h, the mixture was dissolved in EA. Then filter out the inorganic salt from the mixture with sand core funnel. The organic phase was spun dry, evaporated and recrystallization to give compound **3a** (121.9 mg, 84% yield). If the reaction is good and the product is solid, we directly perform recrystallization to obtain the purified product. If recrystallization is not possible, flash chromatography is used to obtain the purified product.

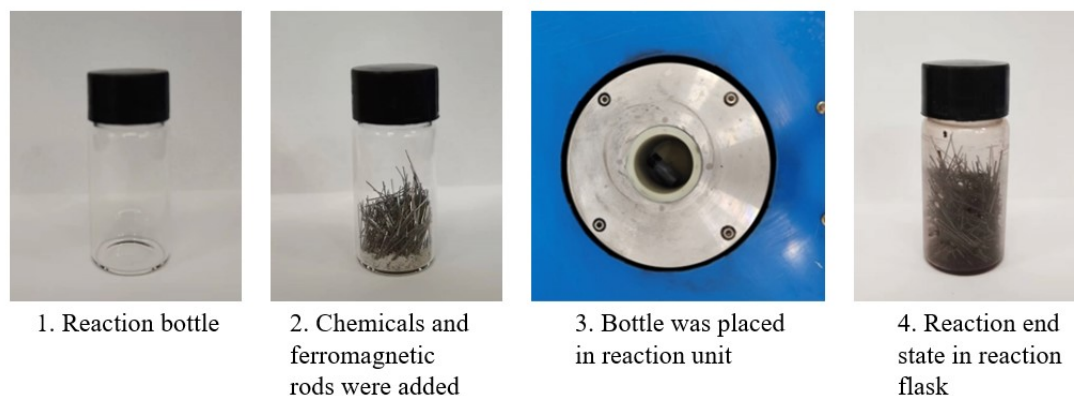

**Figure S2.** Set-up procedure for the cyanidation reaction of 4-bromoacetophenone.

## 2) Procedure II: Pd-catalyzed cyanidation reaction of 4-bromoanisole under EMM.

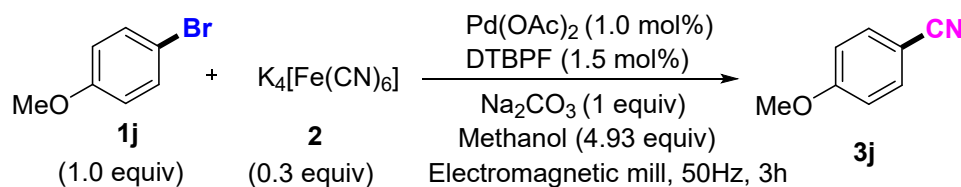

Aryl halide **1j** (93.52 mg, 0.5 mmol 1.0 equiv),  $\text{K}_4[\text{Fe}(\text{CN})_6]$  **2** (55.25 mg, 0.15 mmol, 0.3 equiv),  $\text{Pd}(\text{OAc})_2$  (1.1 mg, 0.005 mmol) and DTBPF (1,1'-bis(di-tert-butylphosphino)ferrocene) (3.56 mg, 0.0075 mmol),  $\text{Na}_2\text{CO}_3$  (53.0 mg, 0.5 mmol 1.0 equiv), Methanol (0.1 mL, 4.93 equiv), ferromagnetic rods 4 g (a diameter of 0.3 mm and a length of 15 mm) were placed in a flat bottom flask. Put it in magnetic grinder. After 3 h, the mixture was dissolved in EA. Then filter out the inorganic salt from the mixture with sand core funnel. The organic phase was spun dry, evaporated and recrystallization to give compound **3j** (57.9 mg, 87% yield). If the reaction is good and the product is solid, we directly perform recrystallization to obtain the purified product. If recrystallization is not possible, flash chromatography is used to obtain the purified product.

### 3) Procedure III: Cyanidation reaction of 4-bromoacetophenone at gram-scale reaction

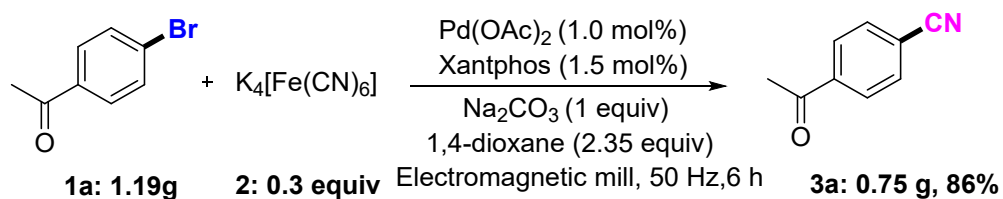

Aryl halide **1a** (1.19 g, 6.0 mmol 1.0 equiv),  $K_4[Fe(CN)_6]$  **2** (0.66 g, 1.8 mmol, 0.3 equiv),  $Pd(OAc)_2$  (0.0135 g, 0.06mmol) and Xantphos (0.054 g, 0.09mmol),  $Na_2CO_3$  (0.636 g, 6.0 mmol 1.0 equiv), 1,4-dioxane (1.2 mL, 2.35 equiv), ferromagnetic rods 20 g (a diameter of 1.0 mm and a length of 10 mm) were placed in a stainless-steel milling jar. Put it in magnetic grinder. After 6 h, the mixture was dissolved in EA. Then filter out the inorganic salt from the mixture with sand core funnel. The organic phase was spun dry, evaporated and recrystallization to give compound **3a** (0.75g, 86% yield).

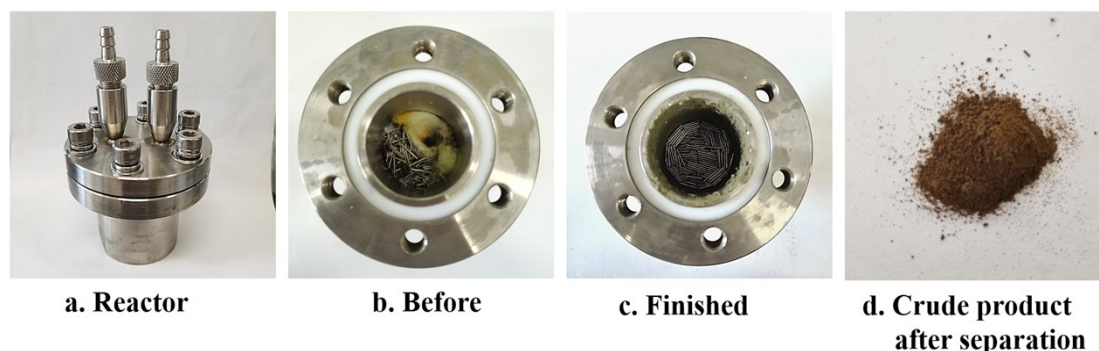

**Figure S3.** Crude product after separating the ferromagnetic rods.

---

#### 4. Ferromagnetic rods of different specifications

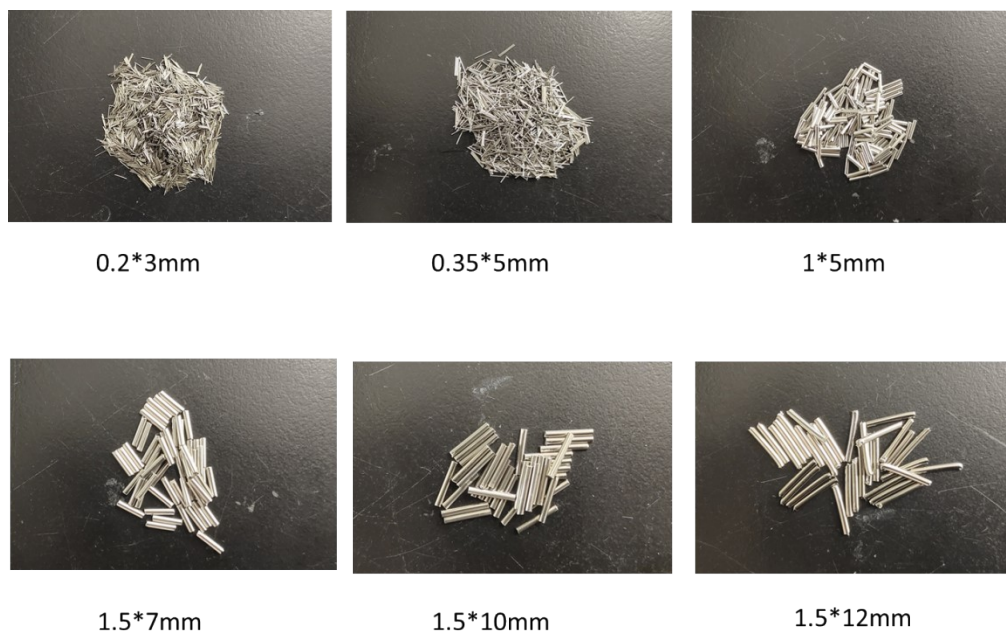

**Figure S4.** Ferromagnetic rods of different sizes used in experiments

#### 5. SEM-EDS data analysis of ferromagnetic rod (0.35\*0.5mm)

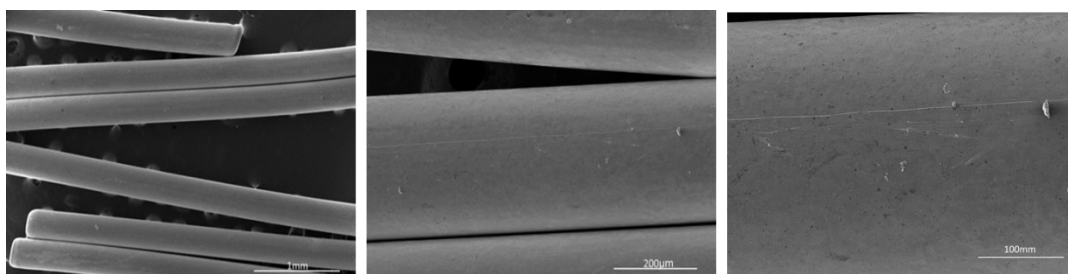

**Figure S5.** Morphology of ferromagnetic rod under scanning electron microscope



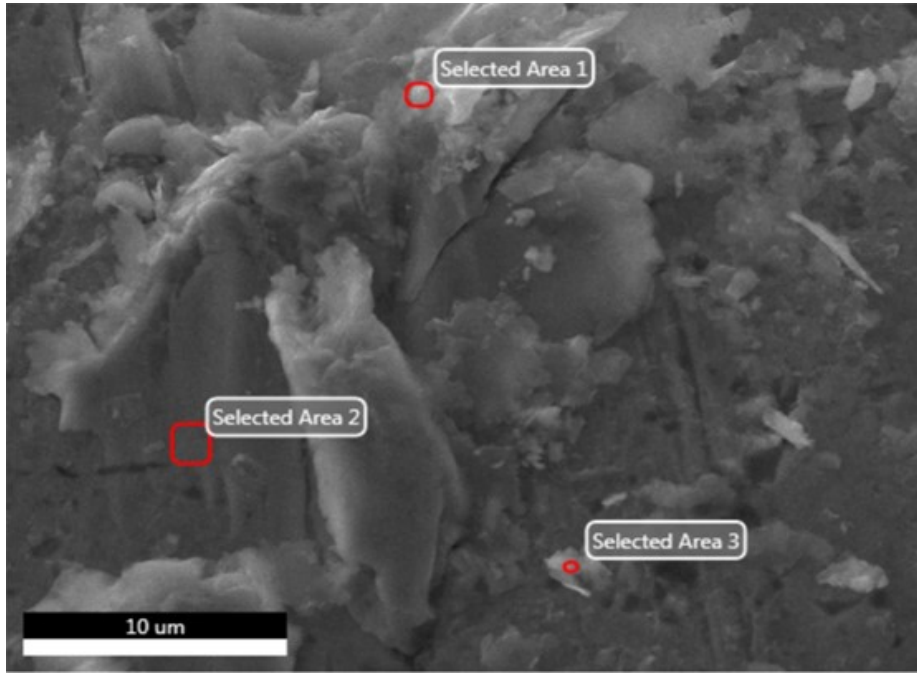

**Selected Area 1**

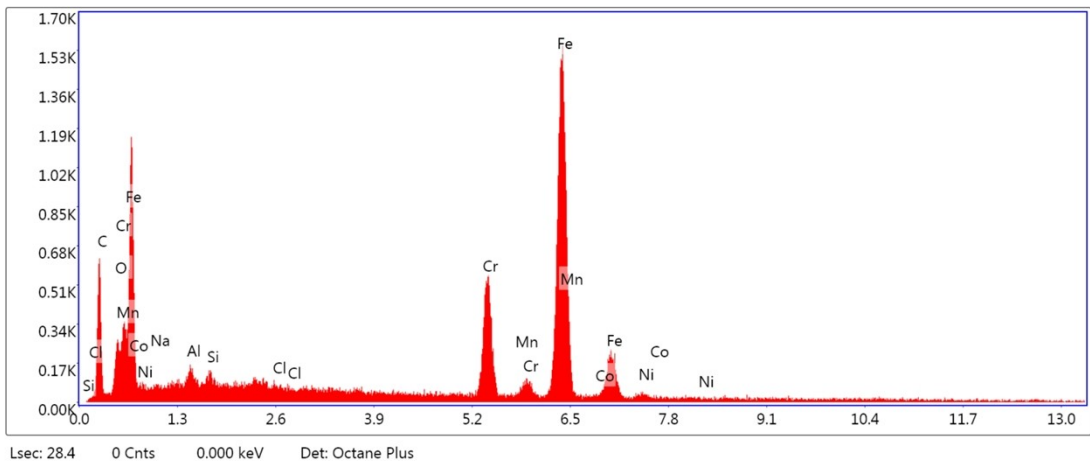

**Selected Area 2**

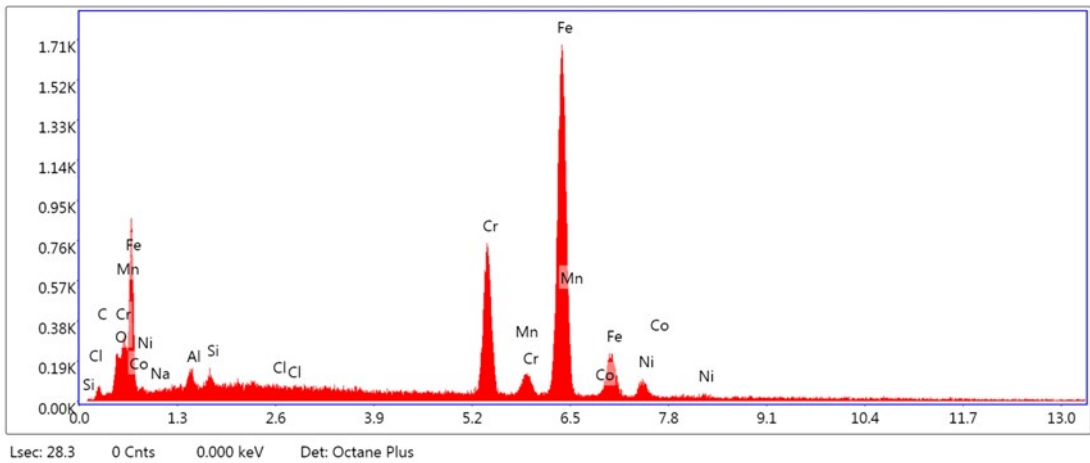

### Selected Area 3

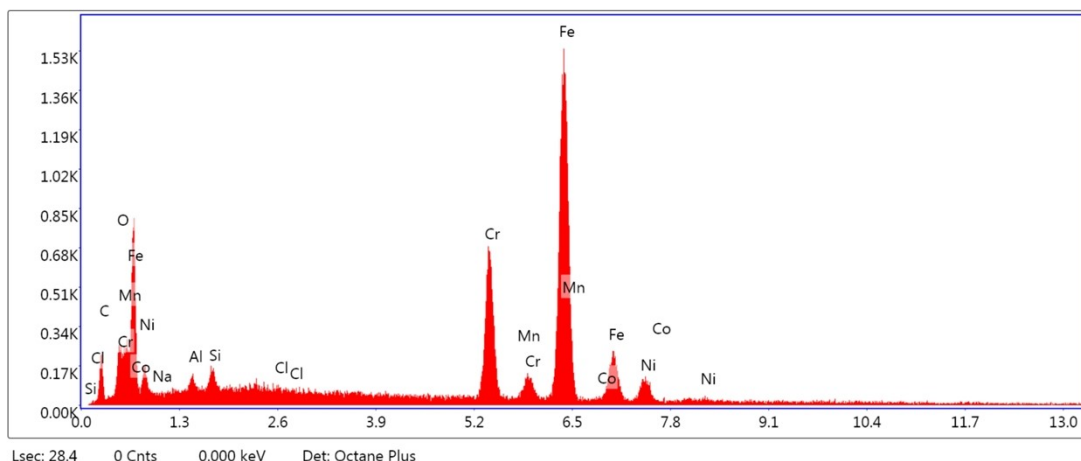

## 6. SEM analysis for crude product and Mapping images of palladium.

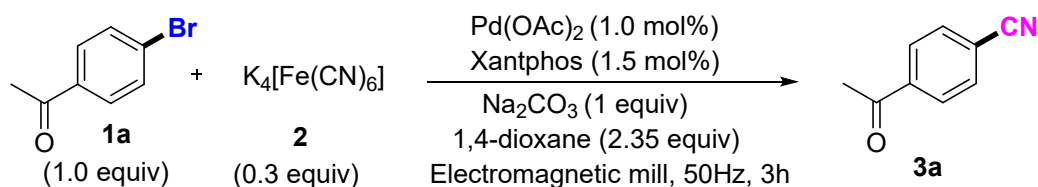

Aryl halide **1a** (199.04 mg, 1 mmol 1.0 equiv),  $K_4[Fe(CN)_6]$  **2** (110.5 mg, 0.3 mmol, 0.3 equiv),  $Pd(OAc)_2$  (2.2 mg, 0.01 mmol) and Xantphos (8.68 mg, 0.015 mmol),  $Na_2CO_3$  (106.0 mg, 1 mmol 1.0 equiv), 1,4-dioxane (0.2 mL, 2.35 equiv), ferromagnetic rods 4 g (a diameter of 0.3 mm and a length of 15 mm) were placed in a flat bottom flask. Put it in magnetic grinder. Set up a set of control experiment (before the reaction) and one put in the grinder for 3 h (after the reaction). The ferromagnetic rods were separated, and the crude product was ground into powder for SEM analysis and the results as follows:

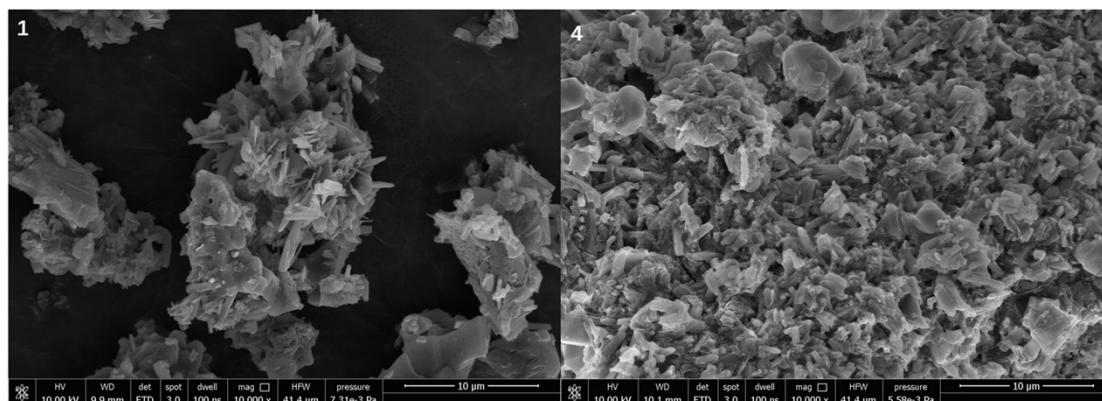

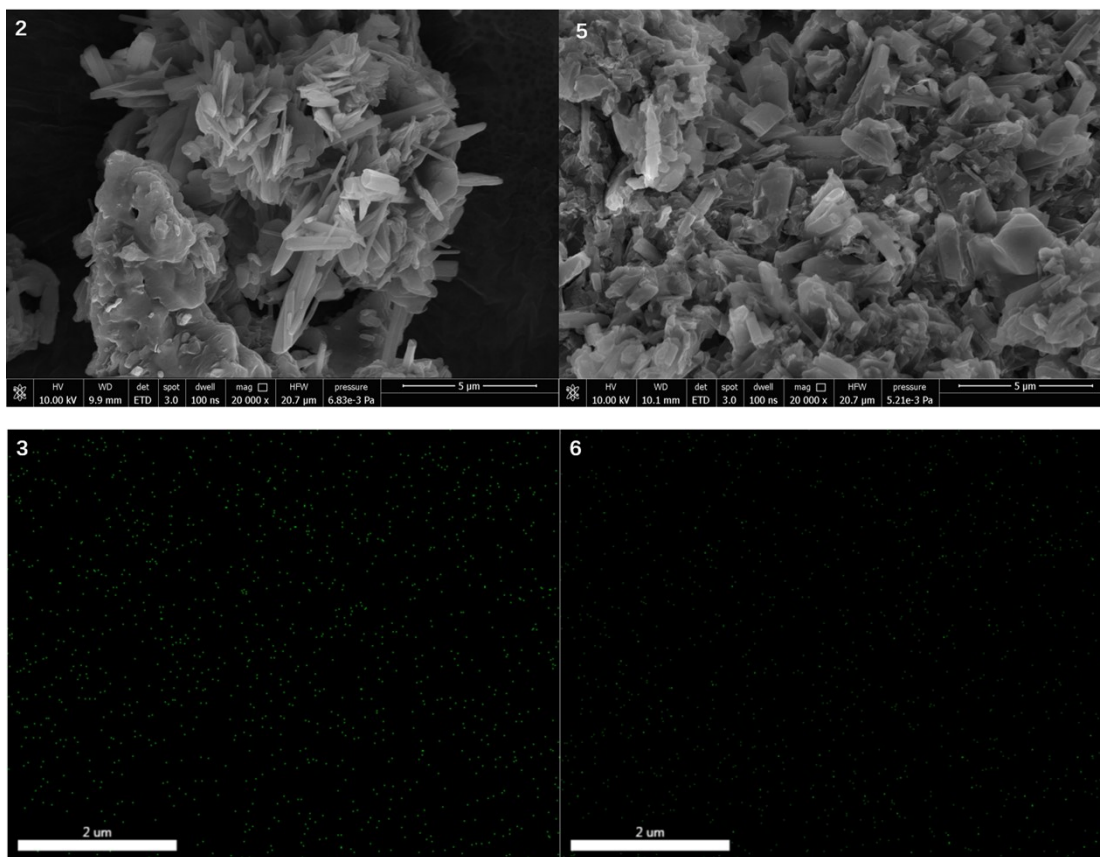

**Figure S6.** 1 and 2: SEM images of the crude reaction mixtures before the reaction. 3: Mapping images of palladium before the reaction. 4 and 5: SEM images of the crude mixture after three hours of reaction. 6: Mapping image of palladium after the reaction was completed.

## 7. Temperature for different reaction times

The temperature of the reaction flask was measured at different times using an electronic thermometer gun. The data obtained show that the temperature rises to about 80°C within one hour, and the highest temperature can reach 96°C during the reaction.

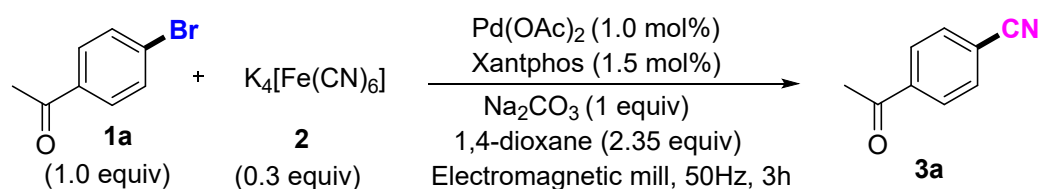

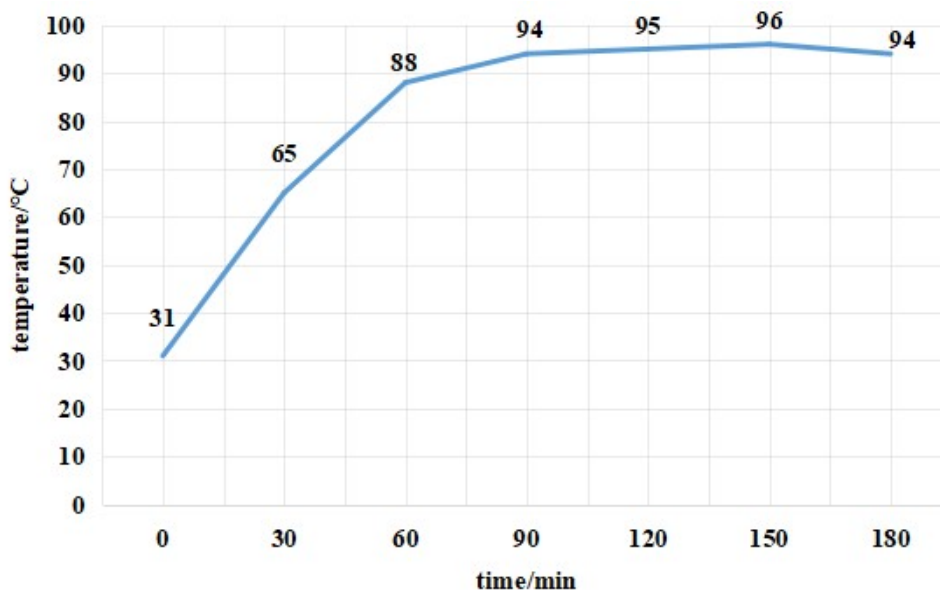

**Figure S7.** Temperature curve with time. Reaction conditions: 1a (0.5 mmol), 2 (0.15 mmol), Pd(OAc)<sub>2</sub> (0.005 mmol), Xantphos (0.0075 mmol), Na<sub>2</sub>CO<sub>3</sub> (1 mmol), 1,4-dioxane (0.1 mL), in a flat bottom flask (10 mL) with ferromagnetic rods (0.3 mm×15 mm, 4 g), EMM, 50 Hz, 3 h.

## 8. Characterization of Obtained Products.

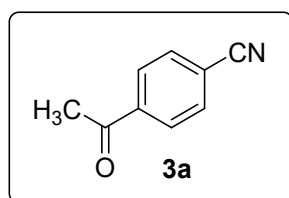

### 4-acetylbenzonitrile

<sup>1</sup>H and <sup>13</sup>C NMR were in agreement with the literature<sup>[1]</sup>.

C<sub>9</sub>H<sub>7</sub>NO

**MW:** 145.16 g·mol<sup>-1</sup> **Light yellow Solid** **Isolated amounts:** 121.9 mg **Yield:** 84%

<sup>1</sup>H NMR (400 MHz, CDCl<sub>3</sub>, δ ppm): 7.96 (d, J = 7.6 Hz, 2H), 7.69 (d, J = 7.6 Hz, 2H), 2.56 (s, 3H).

<sup>13</sup>C NMR (100 MHz, CDCl<sub>3</sub>, δ ppm): 196.35, 139.55, 132.19, 128.40, 117.65, 115.92, 26.49.

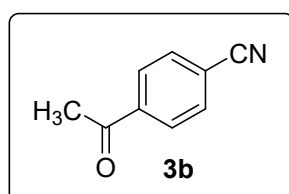

### 4-acetylbenzonitrile

<sup>1</sup>H and <sup>13</sup>C NMR were in agreement with the literature<sup>[1]</sup>.

C<sub>9</sub>H<sub>7</sub>NO

**MW:** 145.16 g·mol<sup>-1</sup> **Light yellow Solid** **Isolated amounts:** 72.58 mg **Yield:** 50%

---

**<sup>1</sup>H NMR (400 MHz, CDCl<sub>3</sub>, δ ppm):** 7.96 (d, J = 7.6 Hz, 2H), 7.69 (d, J = 7.6 Hz, 2H), 2.56 (s, 3H).

**<sup>13</sup>C NMR (100 MHz, CDCl<sub>3</sub>, δ ppm):** 196.35, 139.55, 132.19, 128.40, 117.65, 115.92, 26.49.

---

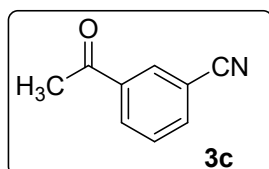

**3-acetylbenzonitrile**

**<sup>1</sup>H and <sup>13</sup>C NMR were in agreement with the literature<sup>[1]</sup>.**

**C<sub>9</sub>H<sub>7</sub>NO**

**MW:** 145.16 g·mol<sup>-1</sup> **White Solid** **Isolated amounts:** 117.58 mg **Yield:** 81%

**<sup>1</sup>H NMR (400 MHz, CDCl<sub>3</sub>, δ ppm):** 8.25 (s, 1H), 8.19 (d, J = 7.6 Hz, 1H), 7.86 (d, J = 7.2 Hz, 1H), 7.63 (t, J = 7.8 Hz, 1H), 2.65 (s, 3H).

**<sup>13</sup>C NMR (101 MHz, CDCl<sub>3</sub>, δ ppm):** 195.79, 137.64, 135.94, 132.16, 131.95, 129.63, 117.85, 113.08, 26.53.

---

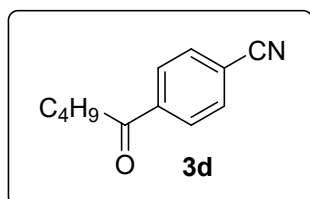

**4-pentanoylbenzonitrile**

**<sup>1</sup>H and <sup>13</sup>C NMR were in agreement with the literature<sup>[2]</sup>**

**C<sub>12</sub>H<sub>13</sub>NO**

**MW:** 187.24 g·mol<sup>-1</sup> **White Solid** **Isolated amounts:** 159.15 mg **Yield:** 85%

**<sup>1</sup>H NMR (400 MHz, CDCl<sub>3</sub>, δ ppm):** 8.06 (d, J = 7.6 Hz, 2H), 7.78 (d, J = 7.6 Hz, 2H), 3.00 (t, J = 7.2 Hz, 2H), 1.77-1.69 (m, 2H), 1.47-1.37 (m, 2H), 0.96 (t, J = 7.4 Hz, 3H).

**<sup>13</sup>C NMR (100 MHz, CDCl<sub>3</sub>, δ ppm):** 198.91, 139.81, 132.35, 128.31, 117.86, 115.97, 38.46, 25.93, 22.20, 13.77.

---

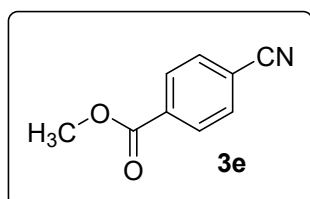

**methyl 4-cyanobenzoate**

**<sup>1</sup>H and <sup>13</sup>C NMR were in agreement with the literature<sup>[3]</sup>**

**C<sub>9</sub>H<sub>7</sub>NO<sub>2</sub>**

**MW:** 161.16 g·mol<sup>-1</sup> **White Solid** **Isolated amounts:** 128.93 mg **Yield:** 80%

---

**$^1\text{H}$  NMR (400 MHz,  $\text{CDCl}_3$ ,  $\delta$  ppm):** 8.05 (d,  $J = 8.0$  Hz, 2H), 7.67 (d,  $J = 7.6$  Hz, 2H), 3.88 (s, 3H).

**$^{13}\text{C}$  NMR (100 MHz,  $\text{CDCl}_3$ ,  $\delta$  ppm):** 165.24, 133.73, 132.07, 129.92, 117.81, 116.19, 52.58.

---

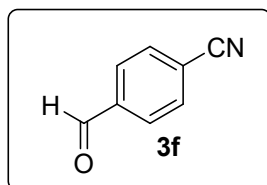

**4-formylbenzonitrile**

**$^1\text{H}$  and  $^{13}\text{C}$  NMR were in agreement with the literature<sup>[3]</sup>**

**$\text{C}_8\text{H}_5\text{NO}$**

**MW:** 131.13  $\text{g}\cdot\text{mol}^{-1}$  **White Solid Isolated amounts:** 89.17 mg **Yield:** 68%

**$^1\text{H}$  NMR (400 MHz,  $\text{CDCl}_3$ ,  $\delta$  ppm):** 10.03 (s, 1H), 7.93 (d,  $J = 7.2$  Hz, 2H), 7.78 (d,  $J = 7.2$  Hz, 2H).

**$^{13}\text{C}$  NMR (100 MHz,  $\text{CDCl}_3$ ,  $\delta$  ppm):** 190.62, 138.45, 132.66, 129.65, 117.53, 117.19.

---

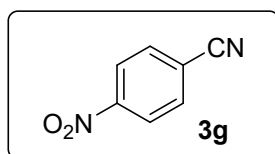

**4-nitrobenzonitrile**

**$^1\text{H}$  and  $^{13}\text{C}$  NMR were in agreement with the literature<sup>[4]</sup>.**

**$\text{C}_7\text{H}_4\text{N}_2\text{O}_2$**

**MW:** 148.12  $\text{g}\cdot\text{mol}^{-1}$  **White Solid Isolated amounts:** 108.13 mg **Yield:** 73%

**$^1\text{H}$  NMR (400 MHz,  $\text{CDCl}_3$ ,  $\delta$  ppm):** 8.38 (d,  $J = 8.4$  Hz, 2H), 7.92 (d,  $J = 8.4$  Hz, 2H).

**$^{13}\text{C}$  NMR (100 MHz,  $\text{CDCl}_3$ ,  $\delta$  ppm):** 149.95, 133.44, 124.24, 118.26, 116.76.

---

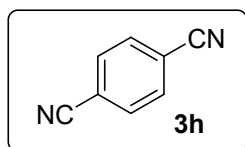

**terephthalonitrile**

**$^1\text{H}$  and  $^{13}\text{C}$  NMR were in agreement with the literature<sup>[3]</sup>**

**$\text{C}_8\text{H}_4\text{N}_2$**

**MW:** 128.13  $\text{g}\cdot\text{mol}^{-1}$  **White Solid Isolated amounts:** 92.25 mg **Yield:** 72%

**$^1\text{H}$  NMR (400 MHz,  $\text{CDCl}_3$ ,  $\delta$  ppm):** 7.74 (s, 4H).

**$^{13}\text{C}$  NMR (100 MHz,  $\text{CDCl}_3$ ,  $\delta$  ppm):** 132.75, 116.97, 116.64.

---

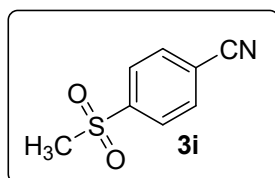

**4-(methylsulfonyl)benzonitrile**

**$^1\text{H}$  and  $^{13}\text{C}$  NMR were in agreement with the literature<sup>[5]</sup>**

**$\text{C}_8\text{H}_7\text{N}_2\text{OS}$**

---

**MW:** 181.21 g·mol<sup>-1</sup> **White Solid** **Isolated amounts:** 168.53 mg **Yield:** 93%

**<sup>1</sup>H NMR (400 MHz, CDCl<sub>3</sub>, δ ppm):** 8.02 (d, J = 7.6 Hz, 2H), 7.84 (d, J = 7.6 Hz, 2H), 3.04 (s, 3H).

**<sup>13</sup>C NMR (100 MHz, CDCl<sub>3</sub>, δ ppm):** 144.26, 133.10, 128.06, 117.38, 116.98, 44.06.

---

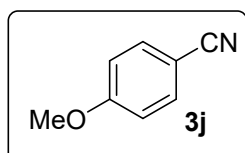

**4-methoxybenzonitrile**

**<sup>1</sup>H and <sup>13</sup>C NMR were in agreement with the literature<sup>[3]</sup>**

**C<sub>8</sub>H<sub>7</sub>NO**

**MW:** 133.15 g·mol<sup>-1</sup> **White Solid** **Isolated amounts:** 115.84 mg **Yield:** 87%

**<sup>1</sup>H NMR (400 MHz, CDCl<sub>3</sub>, δ ppm):** 7.59 (d, J = 8.0 Hz, 2H), 6.96 (d, J = 8.4 Hz, 2H), 3.86 (s, 3H).

**<sup>13</sup>C NMR (100 MHz, CDCl<sub>3</sub>, δ ppm):** 162.78, 133.93, 119.20, 114.69, 103.88, 55.50.

---

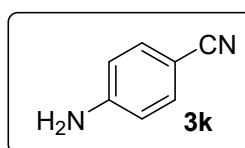

**4-aminobenzonitrile**

**<sup>1</sup>H and <sup>13</sup>C NMR were in agreement with the literature<sup>[6]</sup>**

**C<sub>7</sub>H<sub>6</sub>N<sub>2</sub>**

**MW:** 118.14 g·mol<sup>-1</sup> **White Solid** **Isolated amounts:** 81.52 mg **Yield:** 69%

**<sup>1</sup>H NMR (400 MHz, CDCl<sub>3</sub>, δ ppm):** 7.41 (d, J = 8.0 Hz, 2H), 6.65 (d, J = 8.0 Hz, 2H), 4.22 (s, 2H).

**<sup>13</sup>C NMR (100 MHz, CDCl<sub>3</sub>, δ ppm):** 150.47, 133.68, 120.17, 114.32, 99.77.

---

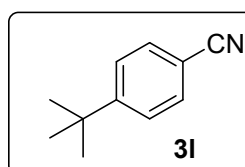

**4-(tert-butyl)benzonitrile**

**<sup>1</sup>H and <sup>13</sup>C NMR were in agreement with the literature<sup>[7]</sup>**

**C<sub>11</sub>H<sub>13</sub>N**

**MW:** 159.23g·mol<sup>-1</sup> **White Solid** **Isolated amounts:** 149.68 mg **Yield:** 94%

**<sup>1</sup>H NMR (400 MHz, CDCl<sub>3</sub>, δ ppm):** 7.59 (d, J = 7.6 Hz, 2H), 7.48 (d, J = 7.2 Hz, 2H), 1.33 (s, 9H).

---

**<sup>13</sup>C NMR (100 MHz, CDCl<sub>3</sub>, δ ppm):** 156.61, 131.95, 126.14, 119.17, 109.26, 35.26, 30.93.

---

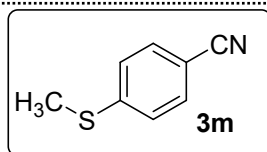

**4-(methylthio)benzonitrile**

**<sup>1</sup>H and <sup>13</sup>C NMR were in agreement with the literature<sup>[8]</sup>**

**C<sub>8</sub>H<sub>7</sub>NS**

**MW:** 149.21 g·mol<sup>-1</sup> **White Solid Isolated amounts:** 94.00 mg **Yield:** 63%

**<sup>1</sup>H NMR (400 MHz, CDCl<sub>3</sub>, δ ppm):** 7.45 (d, J = 8.0 Hz, 2H), 7.18 (d, J = 8.4 Hz, 2H), 2.43 (s, 3H).

**<sup>13</sup>C NMR (100 MHz, CDCl<sub>3</sub>, δ ppm):** 146.02, 132.03, 125.33,

---

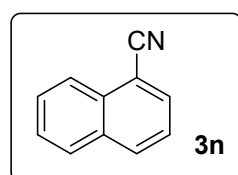

118.89, 107.45, 14.56.

---

**naphthonitrile**

**<sup>1</sup>H and <sup>13</sup>C NMR were in agreement with the literature<sup>[1]</sup>**

**C<sub>11</sub>H<sub>7</sub>N**

**MW:** 153.18 g·mol<sup>-1</sup> **White Solid Isolated amounts:** 110.29 mg **Yield:** 72%

**<sup>1</sup>H NMR (400 MHz, CDCl<sub>3</sub>, δ ppm):** 8.11 (d, J = 8.4 Hz, 1H), 7.95 (d, J = 8.0 Hz, 1H), 7.79 (t, J = 7.6 Hz, 2H), 7.57 (t, J = 7.4 Hz, 1H), 7.50 (t, J = 7.4 Hz, 1H), 7.40 (t, J = 7.2 Hz, 1H).

**<sup>13</sup>C NMR (100 MHz, CDCl<sub>3</sub>, δ ppm):** 133.18, 132.77, 132.51, 132.20, 128.55, 128.48, 127.43, 124.98, 124.81, 117.73, 110.00.

---

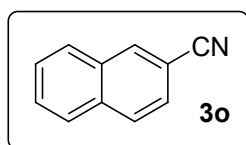

**2-naphthonitrile**

**<sup>1</sup>H and <sup>13</sup>C NMR were in agreement with the literature<sup>[3]</sup>**

**C<sub>11</sub>H<sub>7</sub>N**

**MW:** 153.18 g·mol<sup>-1</sup> **White Solid Isolated amounts:** 93.44 mg **Yield:** 61%

**<sup>1</sup>H NMR (400 MHz, CDCl<sub>3</sub>, δ ppm):** 8.10 (s, 1H), 7.78 (t, J = 8.0 Hz, 3H), 7.52 (dt, J = 17.2, 7.5 Hz, 3H).

**<sup>13</sup>C NMR (100 MHz, CDCl<sub>3</sub>, δ ppm):** 134.51, 134.03, 132.10, 129.08, 128.95, 128.30, 127.94, 127.55, 126.20, 119.17, 109.22.

---

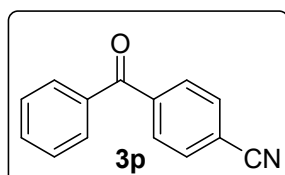

**4-benzoylbenzonitrile**



---

$^1\text{H}$  and  $^{13}\text{C}$  NMR were in agreement with the literature<sup>[9]</sup>

$\text{C}_{14}\text{H}_9\text{NO}$

MW: 207.23  $\text{g}\cdot\text{mol}^{-1}$  White Solid Isolated amounts: 186.51 mg Yield: 90%

$^1\text{H}$  NMR (400 MHz,  $\text{CDCl}_3$ ,  $\delta$  ppm): 7.88 (d,  $J = 8.0$  Hz, 2H), 7.80 (d,  $J = 9.2$  Hz, 4H), 7.65 (t,  $J = 13.4$  Hz, 1H), 7.52 (t,  $J = 7.4$  Hz, 2H).

$^{13}\text{C}$  NMR (100 MHz,  $\text{CDCl}_3$ ,  $\delta$  ppm): 195.01, 141.16, 136.25, 133.29, 132.13, 130.20, 130.02, 128.59, 117.98, 115.60.

---

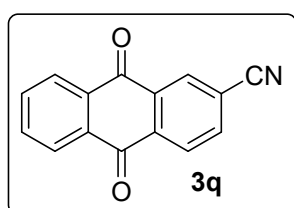

**9,10-dioxo-9,10-dihydroanthracene-2-carbonitrile**

$^1\text{H}$  and  $^{13}\text{C}$  NMR were in agreement with the literature<sup>[10]</sup>

$\text{C}_{15}\text{H}_7\text{NO}_2$

MW: 233.23  $\text{g}\cdot\text{mol}^{-1}$  White Solid Isolated amounts: 205.24 mg Yield: 88%

$^1\text{H}$  NMR (400 MHz,  $\text{CDCl}_3$ ,  $\delta$  ppm): 8.60 (s, 1H), 8.43 (d,  $J = 8.0$  Hz, 1H), 8.33 (d,  $J = 2.8$  Hz, 2H), 8.06 (d,  $J = 8.0$  Hz, 1H), 7.88 (t,  $J = 2.8$  Hz, 2H).

$^{13}\text{C}$  NMR (100 MHz,  $\text{CDCl}_3$ ,  $\delta$  ppm): 181.63, 181.15, 136.61, 135.57, 134.81, 133.76, 133.03, 132.91, 131.25, 128.00, 127.57, 117.68, 117.16.

---

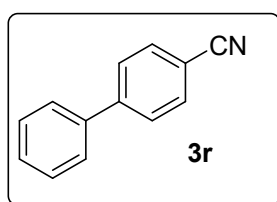

**[1,1'-biphenyl]-4-carbonitrile**

$^1\text{H}$  and  $^{13}\text{C}$  NMR were in agreement with the literature<sup>[3]</sup>

$\text{C}_{13}\text{H}_9\text{N}$

MW: 179.22  $\text{g}\cdot\text{mol}^{-1}$  White Solid Isolated amounts: 163.09 mg Yield: 91%

$^1\text{H}$  NMR (400 MHz,  $\text{CDCl}_3$ ,  $\delta$  ppm): 7.67 (q,  $J = 8.0$  Hz, 4H), 7.57 (d,  $J = 7.2$  Hz, 2H), 7.47 (t,  $J = 7.2$  Hz, 2H), 7.41 (t,  $J = 7.0$  Hz, 1H).

$^{13}\text{C}$  NMR (100 MHz,  $\text{CDCl}_3$ ,  $\delta$  ppm): 145.46, 138.97, 132.44, 128.98, 128.54, 127.56, 127.07, 118.82, 110.72.

---

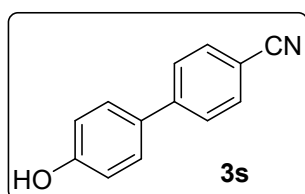

**4'-hydroxy-[1,1'-biphenyl]-4-carbonitrile**

$^1\text{H}$  and  $^{13}\text{C}$  NMR were in agreement with the literature<sup>[11]</sup>

$\text{C}_{13}\text{H}_9\text{NO}$

---

**MW:** 195.22 g·mol<sup>-1</sup>      **White Solid Isolated amounts:** 144.46 mg      **Yield:** 74%

**<sup>1</sup>H NMR (400 MHz, DMSO-d<sub>6</sub>, δ ppm):** 9.86 (s, 1H), 7.81 (d, *J*=8.0 Hz, 2H), 7.75 (d, *J*=8.0 Hz, 2H), 7.58 (d, *J*=12.0 Hz, 2H), 6.90 (d, *J*=8.0 Hz, 2H).

**<sup>13</sup>C NMR (100 MHz, DMSO-d<sub>6</sub>, δ ppm):** 158.42, 144.66, 132.74, 128.83, 128.37, 126.57, 119.15, 116.06, 108.78.

---

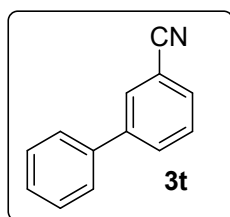

**[1,1'-biphenyl]-3-carbonitrile**

**<sup>1</sup>H and <sup>13</sup>C NMR were in agreement with the literature<sup>[12]</sup>**  
**C<sub>13</sub>H<sub>9</sub>N**

**MW:** 179.22 g·mol<sup>-1</sup>      **White Solid Isolated amounts:** 170.26 mg      **Yield:** 95%

**<sup>1</sup>H NMR (400 MHz, CDCl<sub>3</sub>, δ ppm):** 7.83 (s, 1H), 7.79 (d, *J* = 8.0 Hz, 1H), 7.61 (d, *J* = 7.6 Hz, 1H), 7.53 (t, *J* = 8.4 Hz, 3H), 7.47 (t, *J* = 7.2 Hz, 2H), 7.40 (t, *J* = 7.0 Hz, 1H).

**<sup>13</sup>C NMR (100 MHz, CDCl<sub>3</sub>, δ ppm):** 142.26, 138.70, 131.37, 130.57, 130.55, 129.50, 129.01, 128.28, 126.95, 118.76, 112.78.

---

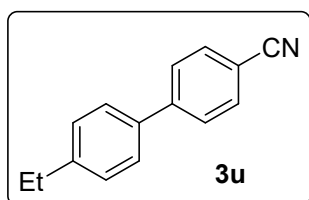

**4'-ethyl-[1,1'-biphenyl]-4-carbonitrile**

**<sup>1</sup>H and <sup>13</sup>C NMR were in agreement with the literature<sup>[13]</sup>**  
**C<sub>15</sub>H<sub>13</sub>N**

**MW:** 207.28 g·mol<sup>-1</sup>      **White Solid Isolated amounts:** 128.51 mg      **Yield:** 62%

**<sup>1</sup>H NMR (400 MHz, CDCl<sub>3</sub>, δ ppm):** 7.61 (q, *J* = 7.6 Hz, 4H), 7.44 (d, *J* = 7.6 Hz, 2H), 7.24 (d, *J* = 7.2 Hz, 2H), 2.63 (q, *J* = 7.6 Hz, 2H), 1.21 (t, *J* = 7.8 Hz, 3H).

**<sup>13</sup>C NMR (100 MHz, CDCl<sub>3</sub>, δ ppm):** 145.57, 145.03, 136.44, 132.52, 128.61, 127.44, 127.11, 119.03, 110.46, 28.53, 15.49.

---

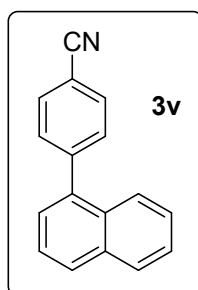

**4-(naphthalen-1-yl)benzonitrile**

**<sup>1</sup>H and <sup>13</sup>C NMR were in agreement with the literature<sup>[14]</sup>**  
**C<sub>17</sub>H<sub>11</sub>N**

MW: 229.28 g·mol<sup>-1</sup>

White Solid

Isolated amounts: 96.30mg Yield: 42%

<sup>1</sup>H NMR (400 MHz, CDCl<sub>3</sub>, δ ppm): 7.89 (t, J = 7.7 Hz, 2H), 7.72 (dd, J = 16.9, 8.4 Hz, 3H), 7.54 – 7.47 (m, 4H), 7.43 (td, J = 7.6, 6.8, 1.2 Hz, 1H), 7.34 (d, J = 7.0 Hz, 1H).

<sup>13</sup>C NMR (100 MHz, CDCl<sub>3</sub>, δ ppm): 145.38, 137.96, 131.93, 130.71, 130.59, 128.61, 128.39, 126.88, 126.49, 126.02, 125.19, 124.99, 118.78, 110.90.

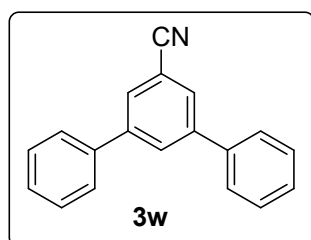

**[1,1':3',1''-terphenyl]-5'-carbonitrile**

<sup>1</sup>H and <sup>13</sup>C NMR were in agreement with the literature<sup>[15]</sup>

C<sub>19</sub>H<sub>13</sub>N

MW: 255.32g·mol<sup>-1</sup>

White Solid

Isolated amounts: 229.79 mg Yield: 90%

<sup>1</sup>H NMR (400 MHz, CDCl<sub>3</sub>, δ ppm): 7.98 (s, 1H), 7.82 (d, J = 4.0 Hz, 2H), 7.60 (d, J = 8.0 Hz, 4H), 7.49 (t, J = 8.0 Hz, 4H), 7.43 (t, J = 8.0 Hz, 2H).

<sup>13</sup>C NMR (100 MHz, CDCl<sub>3</sub>, δ ppm): 142.94, 138.87, 130.32, 129.26, 129.12, 128.45, 127.13, 118.83, 113.34.

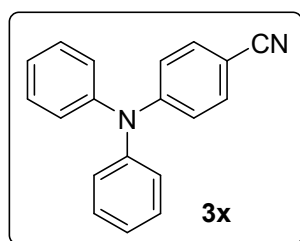

**4-(diphenylamino)benzonitrile**

<sup>1</sup>H and <sup>13</sup>C NMR were in agreement with the literature<sup>[16]</sup>

C<sub>19</sub>H<sub>14</sub>N<sub>2</sub>

MW: 270.34 g·mol<sup>-1</sup> White Solid Isolated

amounts:135.17 mg Yield: 50%

<sup>1</sup>H NMR (400 MHz, CDCl<sub>3</sub>, δ ppm): 7.24 (d, J = 8.0 Hz, 2H), 7.18 (t, J = 8.0 Hz, 4H), 7.01 (t, J = 8.0 Hz, 6H), 6.81 (d, J = 8.0 Hz, 2H).

<sup>13</sup>C NMR (100 MHz, CDCl<sub>3</sub>, δ ppm): 151.27, 145.64, 132.91, 129.57, 125.89, 124.93, 119.39, 102.16.

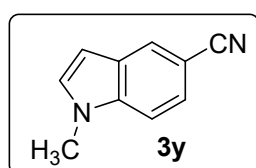

**methyl-1H-indole-5-carbonitrile**

<sup>1</sup>H and <sup>13</sup>C NMR were in agreement with the literature<sup>[17]</sup>

C<sub>10</sub>H<sub>8</sub>N<sub>2</sub>

MW: 156.19 g·mol<sup>-1</sup>

White Solid

---

**Isolated amounts:** 87.47 mg    **Yield:** 56%

**<sup>1</sup>H NMR (400 MHz, CDCl<sub>3</sub>, δ ppm):** 7.92 (s, 1H), 7.40 (d, J = 8.4 Hz, 1H), 7.33 (d, J = 8.4 Hz, 1H), 7.16 (s, 1H), 6.54 (s, 1H), 3.81 (s, 3H).

**<sup>13</sup>C NMR (100 MHz, CDCl<sub>3</sub>, δ ppm):** 137.98, 131.07, 127.98, 126.27, 124.21, 120.81, 109.97, 102.06, 101.95, 32.94.

---

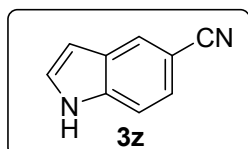

**1H-indole-5-carbonitrile**

**<sup>1</sup>H and <sup>13</sup>C NMR were in agreement with the literature<sup>[18]</sup>**

**C<sub>9</sub>H<sub>6</sub>N<sub>2</sub>**

**MW:** 142.16 g·mol<sup>-1</sup>

**White Solid**

**Isolated amounts:** 102.2 mg    **Yield:** 72%

**<sup>1</sup>H NMR (400 MHz, CDCl<sub>3</sub>, δ ppm):** 8.95 (s, 1H), 7.98 (s, 1H), 7.48 (d, J = 8.4 Hz, 1H), 7.40 (d, J = 8.4 Hz, 1H), 7.34 (s, 1H), 6.61 (s, 1H).

**<sup>13</sup>C NMR (100 MHz, CDCl<sub>3</sub>, δ ppm):** 137.50, 127.54, 126.61, 126.25, 124.57, 121.00, 112.06, 103.10, 102.20.

---

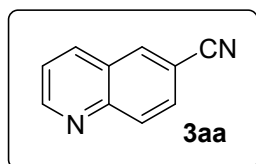

**quinoline-6-carbonitrile**

**<sup>1</sup>H and <sup>13</sup>C NMR were in agreement with the literature<sup>[31]</sup>**

**C<sub>10</sub>H<sub>6</sub>N<sub>2</sub>**

**MW:** 154.17 g·mol<sup>-1</sup>

**White Solid Isolated amounts:** 146.46 mg    **Yield:** 95%

**<sup>1</sup>H NMR (400 MHz, CDCl<sub>3</sub>, δ ppm):** 8.96 (s, 1H), 8.13 (s, 2H), 8.09 (d, J = 8.8 Hz, 1H), 7.75 (d, J = 8.8 Hz, 1H), 7.46 (t, J = 3.8 Hz, 1H).

**<sup>13</sup>C NMR (100 MHz, CDCl<sub>3</sub>, δ ppm):** 153.08, 148.86, 136.21, 133.95, 130.82, 129.90, 127.32, 122.56, 118.32, 110.13.

---

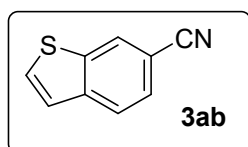

**benzo[b]thiophene-6-carbonitrile**

**<sup>1</sup>H and <sup>13</sup>C NMR were in agreement with the literature<sup>[19]</sup>**

**C<sub>9</sub>H<sub>5</sub>NS Melting Point :**41.5 °C -42.0 °C

**MW:** 159.21 g·mol<sup>-1</sup> **Transparent liquid Isolated amounts:** 105.08 mg **Yield:** 66%

---

**$^1\text{H}$  NMR (400 MHz,  $\text{CDCl}_3$ ,  $\delta$  ppm):** 7.98 (s, 1H), 7.71 (d,  $J = 8.0$  Hz, 1H), 7.56 (d,  $J = 4.0$  Hz, 1H), 7.40 (dd,  $J = 8.3, 1.4$  Hz, 1H), 7.27 – 7.23 (m, 1H).

**$^{13}\text{C}$  NMR (100 MHz,  $\text{CDCl}_3$ ,  $\delta$  ppm):** 142.08, 139.19, 131.06, 126.87, 126.41, 123.99, 123.68, 119.06, 107.06.

---

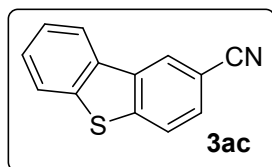

**dibenzo[b,d]thiophene-2-carbonitrile**

**$^1\text{H}$  and  $^{13}\text{C}$  NMR were in agreement with the literature<sup>[20]</sup>**  
 **$\text{C}_{13}\text{H}_7\text{NS}$**

**MW:** 209.27  $\text{g}\cdot\text{mol}^{-1}$     **White Solid**    **Isolated amounts:** 110.91 mg    **Yield:** 53%

**$^1\text{H}$  NMR (400 MHz,  $\text{CDCl}_3$ ,  $\delta$  ppm):** 8.28 (s, 1H), 8.06 (d,  $J = 4.0$  Hz, 1H), 7.83 (t,  $J = 8.0$  Hz, 2H), 7.62 – 7.57 (m, 1H), 7.53 – 7.45 (m, 2H).

**$^{13}\text{C}$  NMR (100 MHz,  $\text{CDCl}_3$ ,  $\delta$  ppm):** 143.94, 139.45, 135.58, 133.78, 128.67, 127.91, 125.36, 125.06, 123.41, 122.77, 121.75, 119.18, 107.74.

---

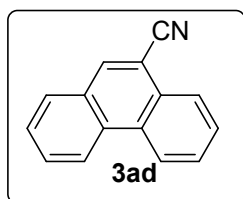

**phenanthrene-9-carbonitrile**

**$^1\text{H}$  and  $^{13}\text{C}$  NMR were in agreement with the literature<sup>[4]</sup>**  
 **$\text{C}_{15}\text{H}_9\text{N}$**

**MW:** 203.24  $\text{g}\cdot\text{mol}^{-1}$     **Yellow Solid**

**Isolated amounts:** 160.56 mg    **Yield:** 79%

**$^1\text{H}$  NMR (400 MHz,  $\text{CDCl}_3$ ,  $\delta$  ppm):** 8.70 (t,  $J = 8.0$  Hz, 2H), 8.35 – 8.21 (m, 2H), 7.93 (d,  $J = 8.0$  Hz, 1H), 7.86 – 7.64 (m, 4H).

**$^{13}\text{C}$  NMR (100 MHz,  $\text{CDCl}_3$ ,  $\delta$  ppm):** 135.64, 131.74, 129.98, 129.81, 129.74, 129.48, 128.82, 128.19, 128.09, 127.61, 126.07, 123.06, 122.84, 117.92, 109.35.

---

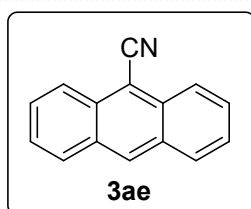

**anthracene-9-carbonitrile**

**$^1\text{H}$  and  $^{13}\text{C}$  NMR were in agreement with the literature<sup>[12]</sup>**  
 **$\text{C}_{15}\text{H}_9\text{N}$**

**MW:** 203.24  $\text{g}\cdot\text{mol}^{-1}$     **Green Solid**

**Isolated amounts:** 178.85 mg    **Yield:** 88%

**$^1\text{H}$  NMR (400 MHz,  $\text{CDCl}_3$ ,  $\delta$  ppm):** 8.62 (s, 1H), 8.38 (d,  $J = 8.4$  Hz, 2H), 8.04 (d,  $J = 8.4$  Hz, 2H), 7.69 (t,  $J = 7.6$  Hz, 2H), 7.56 (t,  $J = 7.4$  Hz, 2H).

**$^{13}\text{C}$  NMR (100 MHz,  $\text{CDCl}_3$ ,  $\delta$  ppm):** 133.22, 132.69, 130.53, 128.90, 128.89, 126.30,

125.21, 117.23, 105.33.

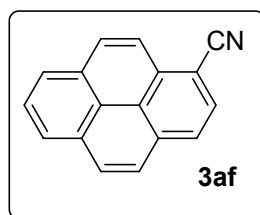

**pyrene-1-carbonitrile**

**$^1\text{H}$  and  $^{13}\text{C}$  NMR were in agreement with the literature<sup>[21]</sup>**

**$\text{C}_{17}\text{H}_9\text{N}$**

**MW:** 227.27 g·mol<sup>-1</sup> **White Solid** **Isolated amounts:** 211.36 mg **Yield:** 93%

**$^1\text{H}$  NMR (400 MHz,  $\text{CDCl}_3$ ,  $\delta$  ppm):** 8.00 (t,  $J$  = 8.6 Hz, 3H), 7.90 – 7.85 (m, 4H), 7.76 (d,  $J$  = 7.6 Hz, 1H), 7.70 (d,  $J$  = 8.8 Hz, 1H).

**$^{13}\text{C}$  NMR (100 MHz,  $\text{CDCl}_3$ ,  $\delta$  ppm):** 133.67, 132.40, 130.40, 130.08, 129.99, 129.07, 126.74, 126.68, 126.64, 126.45, 123.97, 123.38, 123.33, 122.93, 118.64, 105.09.

## 9. References

- [1] T. Schareina, A. Zapf, M. Beller, *Chem. Commun.* 2004, **12**, 1388.
- [2] K. Saikia, D. K. Dutta, *J. Mol. Catal. A. Chem.* 2015, **408**, 20.
- [3] S. Shi, M. Szostak, *Org. Lett.* 2017, **19**, 3095.
- [4] A. R. Hajipour, K. Karami, A. Pirisedigh, *Appl. Organomet. Chem.* 2010, **24**, 454.
- [5] W. Y. Fang, H. L. Qin, *J. Org. Chem.* 2019, **84**, 5803.
- [6] H. Yu, R. N. Richey, W. D. Miller, J. Xu, *J. Org. Chem.* 2011, **76**, 665.
- [7] X. Nie, Y. Zheng, L. Ji, H. Fu, H. Chen, R. Li, *J. Catal.* 2020, **391**, 378.
- [8] C. Fang, M. Li, X. Hu, W. Mo, B. Hu, N. Sun, L. Jin, Z. Shen, *Adv. Synth. Catal.* 2016, **358**, 1157.
- [9] M. Guo, J. Ge, Z. Zhu, X. Wu, *Lett. Org. Chem.* 2013, **10**, 213.
- [10] M. E. Mohanty, C. Madhu, V. L. Reddy, M. Paramasivam, P. R. Bangal, V. J. Rao, *Phys. Chem. Chem. Phys.* 2017, **19**, 9118.
- [11] Y. Sang, S. Han, S. Han, C. Pannecouque, E. De Clercq, C. Zhuang, F. Chen, *Bioorg.* 2019, **89**, 102974.
- [12] G. Zhang, H. Miao, C. Guan, C. Ding, *J. Org. Chem.* 2022, **87**, 12791.
- [13] D. Zhang, T. Iwai, M. Sawamura, *Org. Lett.* 2019, **21**, 5867.
- [14] M. Akkoç, N. Buğday, S. Altın, İ. Özdemir, S. Yaşar, *Catal. Lett.* 2022, **152**, 1621.
- [15] Polaczkowa, *Roczniki Chemii.* 1961, vol. 35, p. 1263.
- [16] S. B. Mane, C. F. Cheng, A. A. Sutanto, A. Datta, A. Dutta, C. H. Hung, *Tetrahedron.* 2015, **71**, 7977.
- [17] P. Anbarasan, H. Neumann, M. Beller, *Angew. Chem. Int. Ed.* 2011, **50**, 519.
- [18] A. T. Murray, J. D. Challinor, C. E. Gulacsy, C. Lujan, L. E. Hatcher, C. R. Pudney, P. R. Raithby, M. P. John, D. R. Carbery, *Org. Biomol. Chem.*, 2016, **14**, 3787.
- [19] D. Allen, O. Callaghan, F. L. Cordier, D. R. Dobson, J. R. Harris, T. M. Hotten,

- W. M. Owton, R. E. Rathmell, V. A. Wood, *Tetrahedron. Lett.* 2004, **45**, 9645.
- [20] Y. Masuya, Y. Kawashima, T. Kodama, N. Chatani, M. Tobisu, *Synlett.* 2019, **30**, 1995.
- [21] M. E. Mohanty, C. Madhu, V. L. Reddy, M. Paramasivam, P. R. Bangal, V. J. Rao, *Phys. Chem. Chem. Phys.* 2017, **19**, 9118.

## 10. Copies of the $^1\text{H}$ NMR, $^{13}\text{C}$ NMR

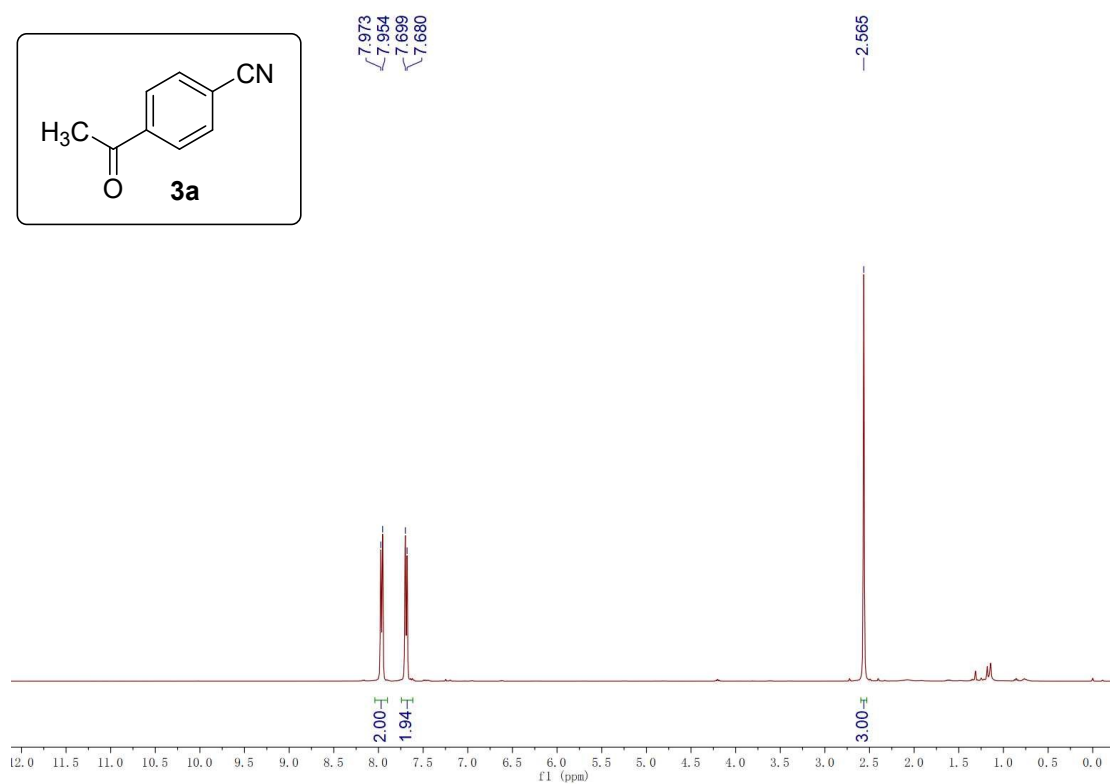

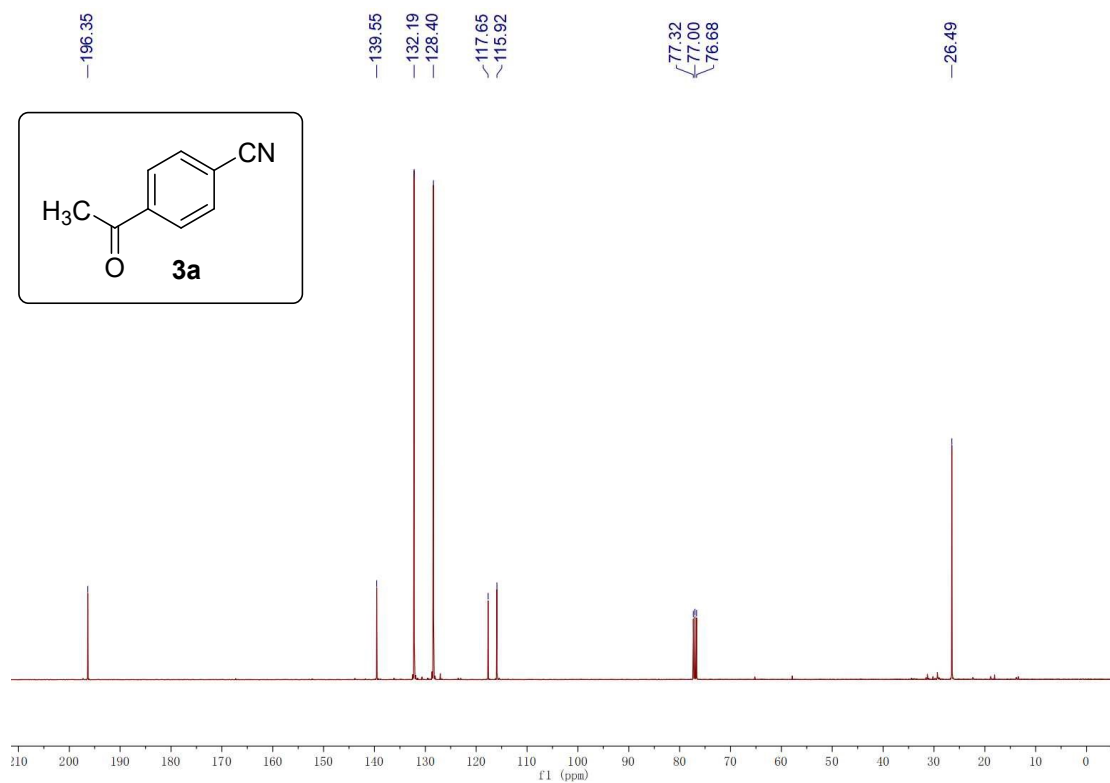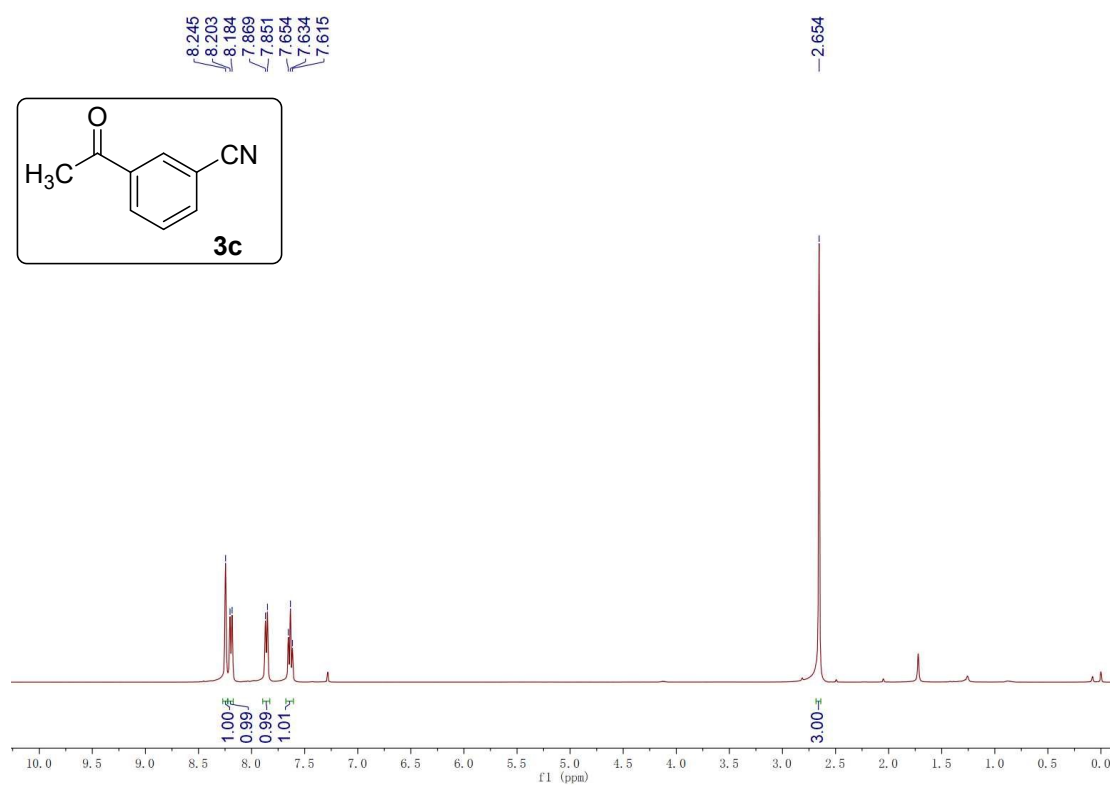



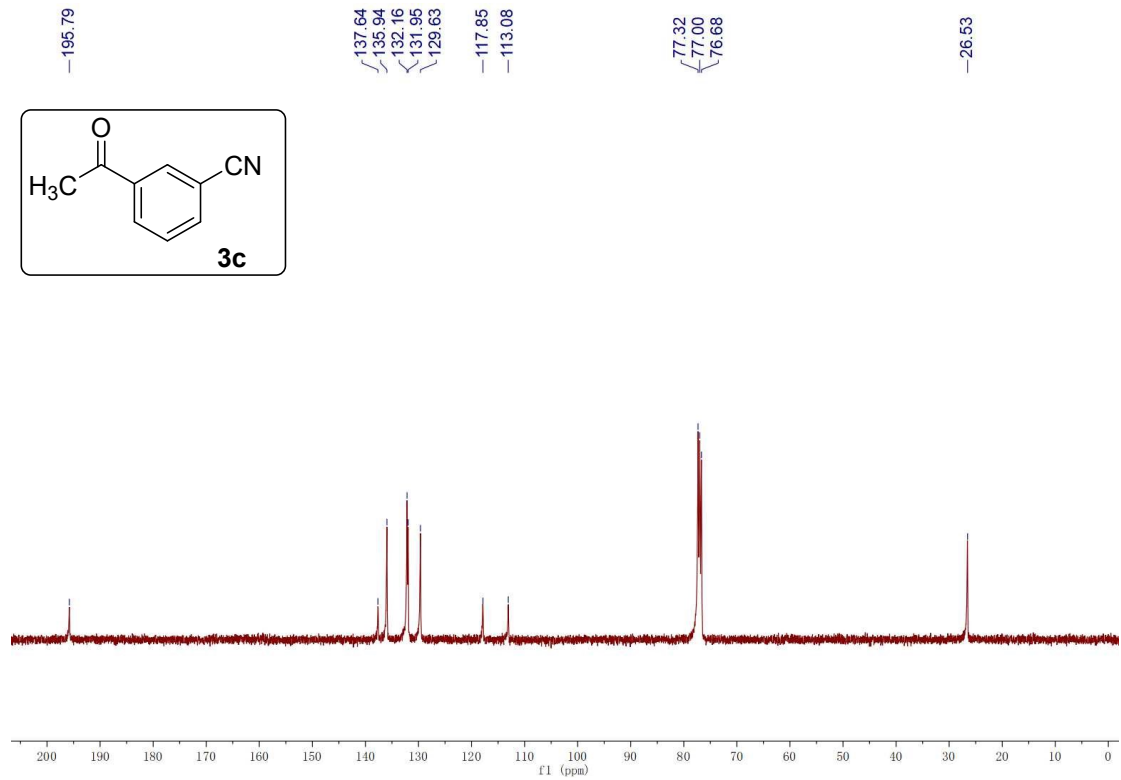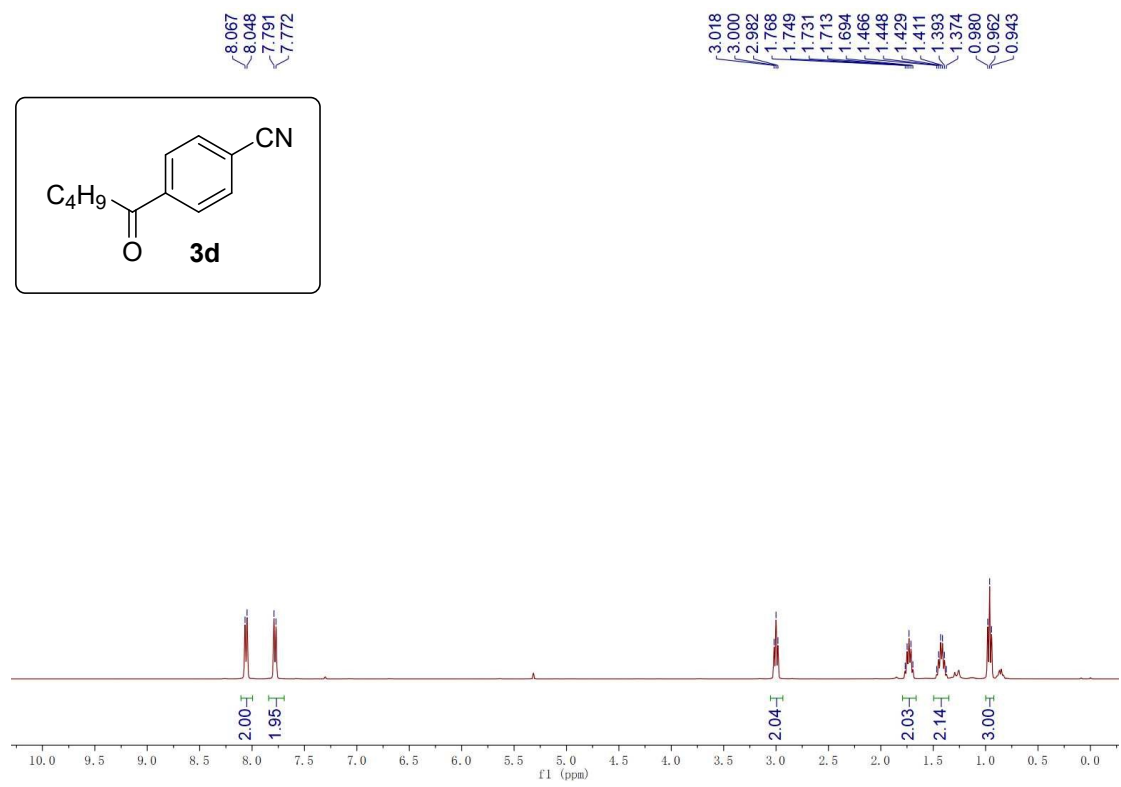

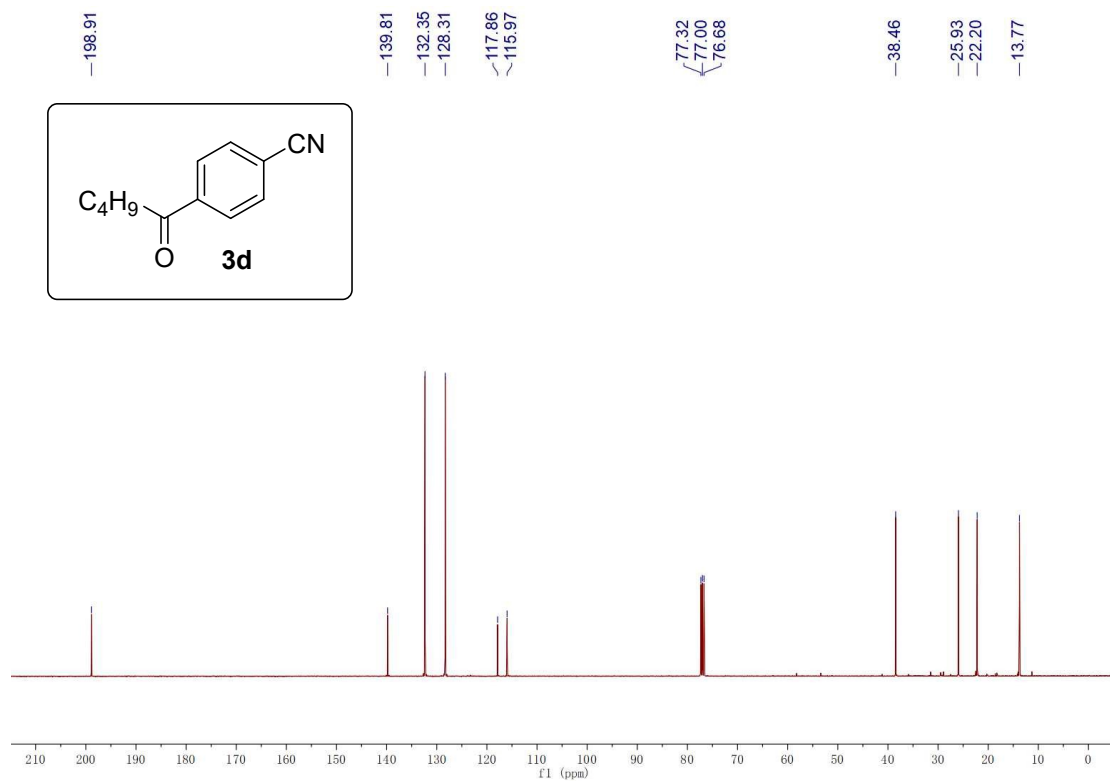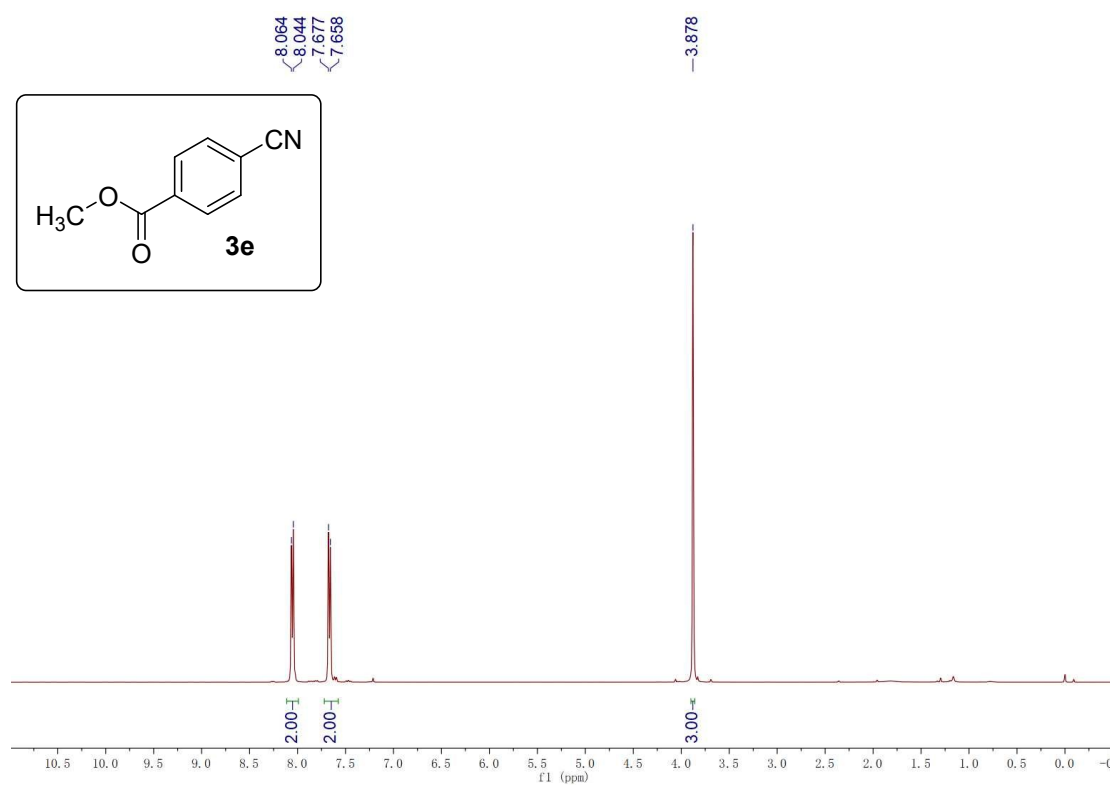

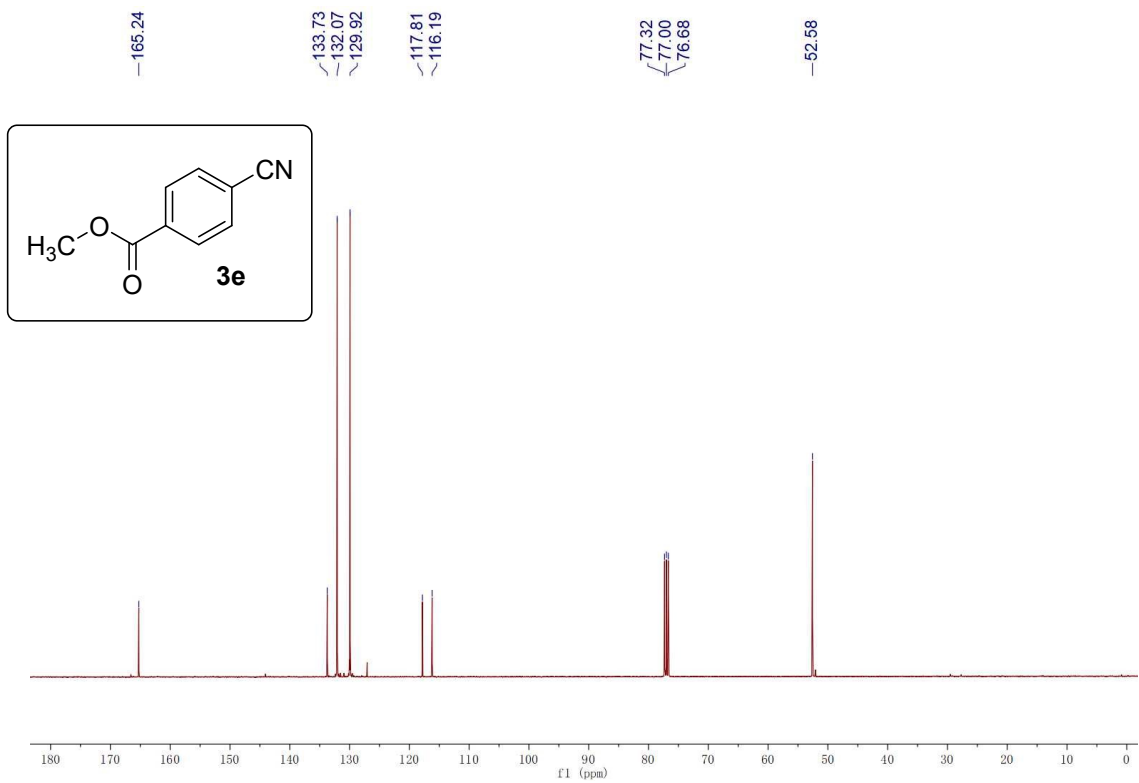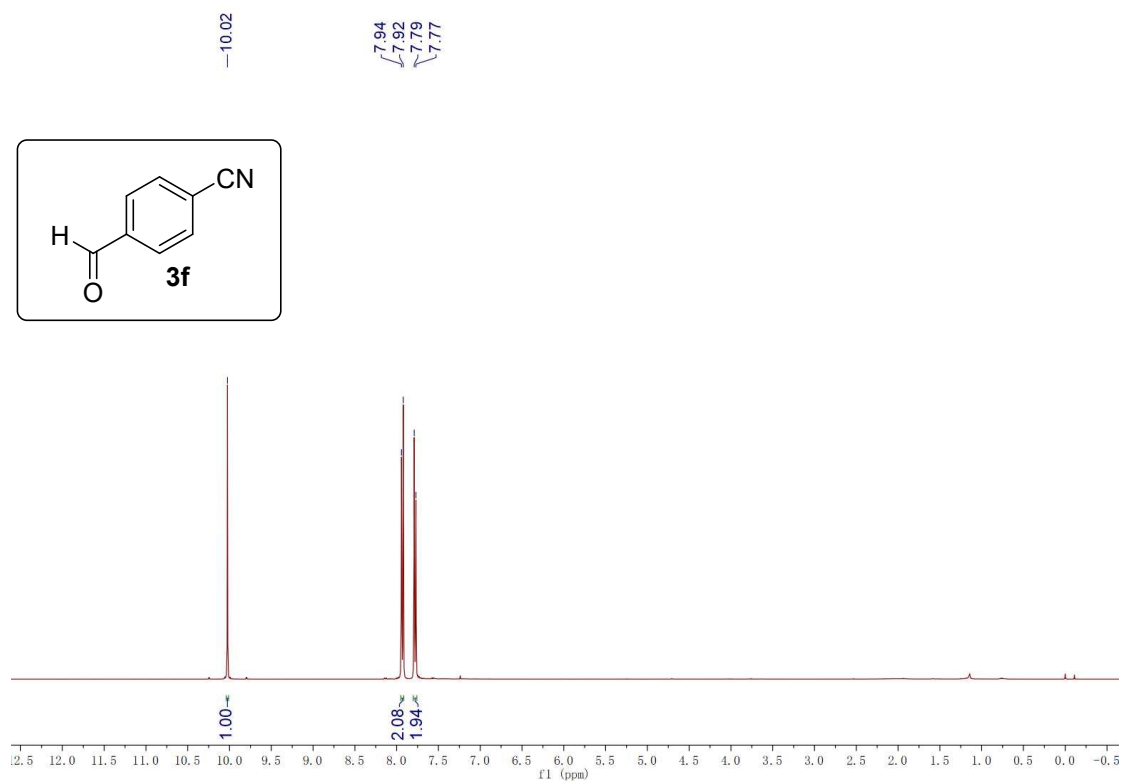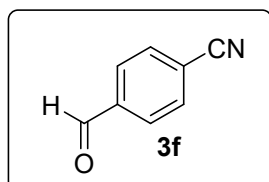

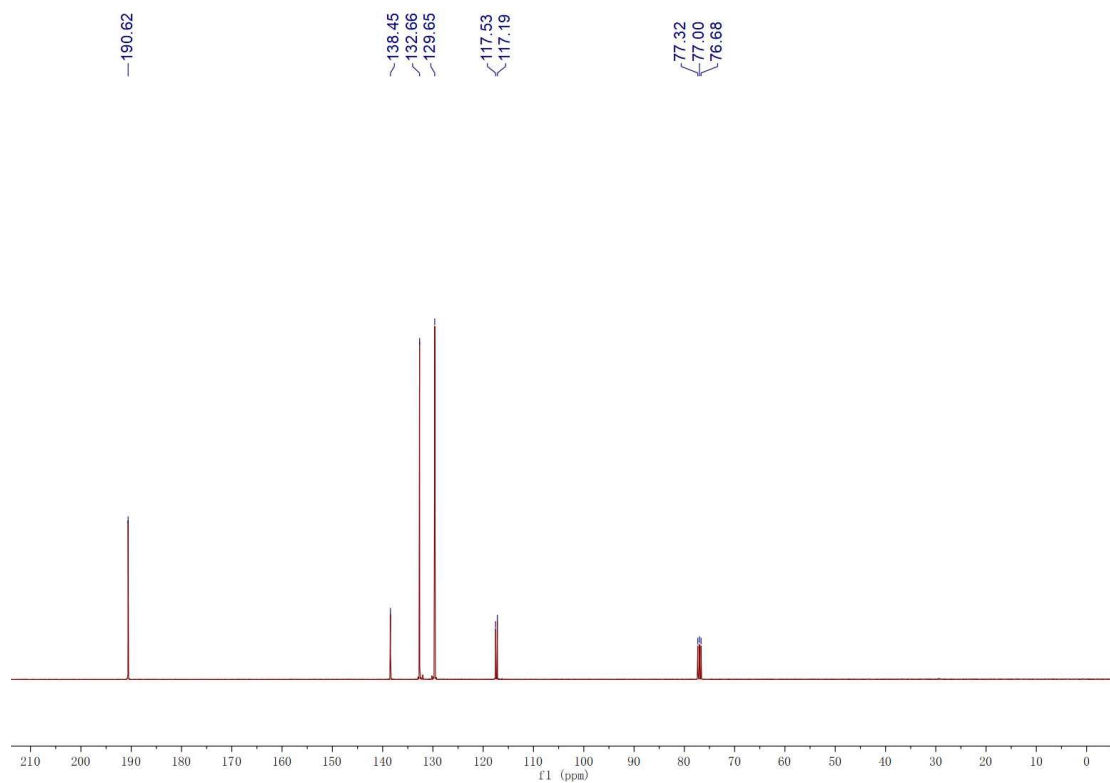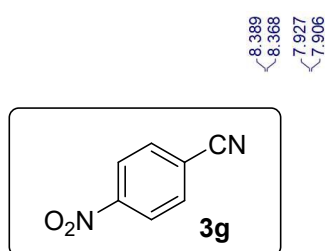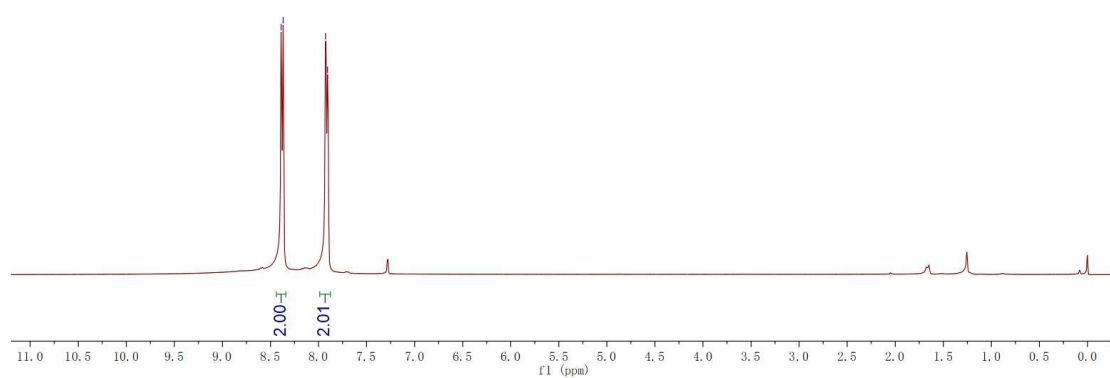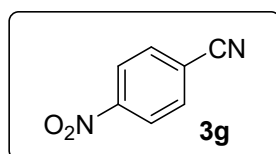

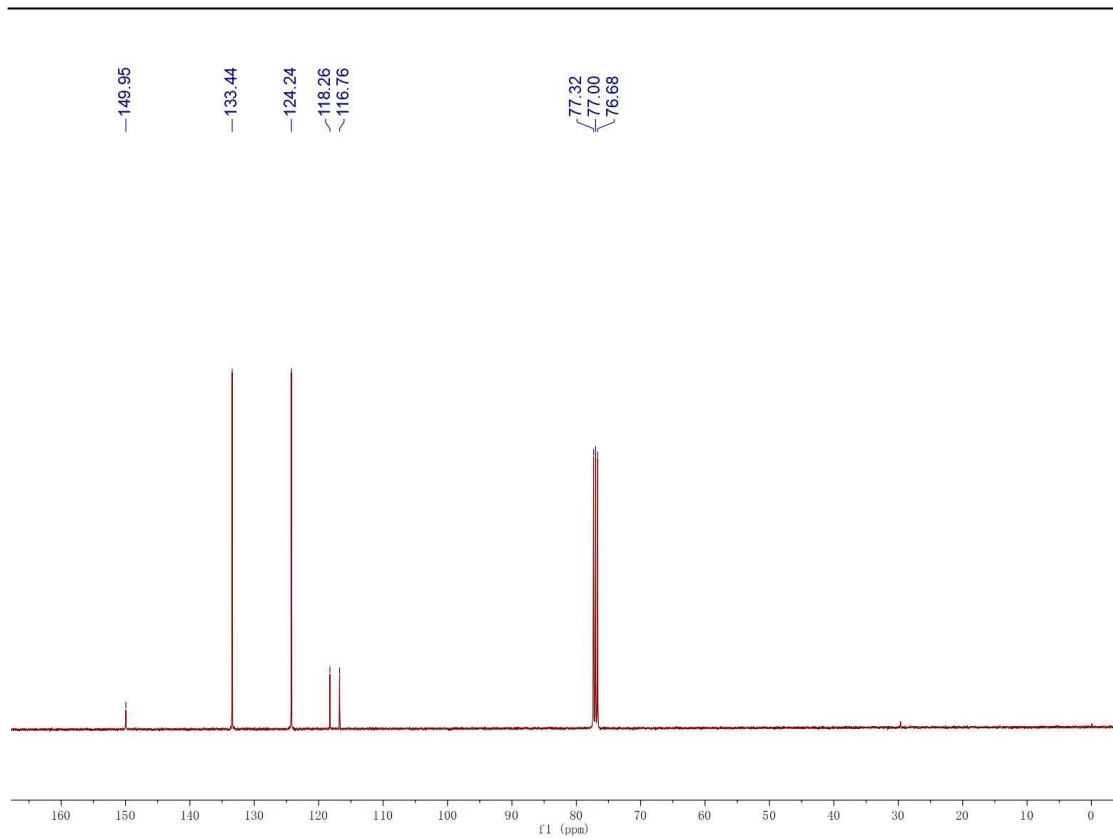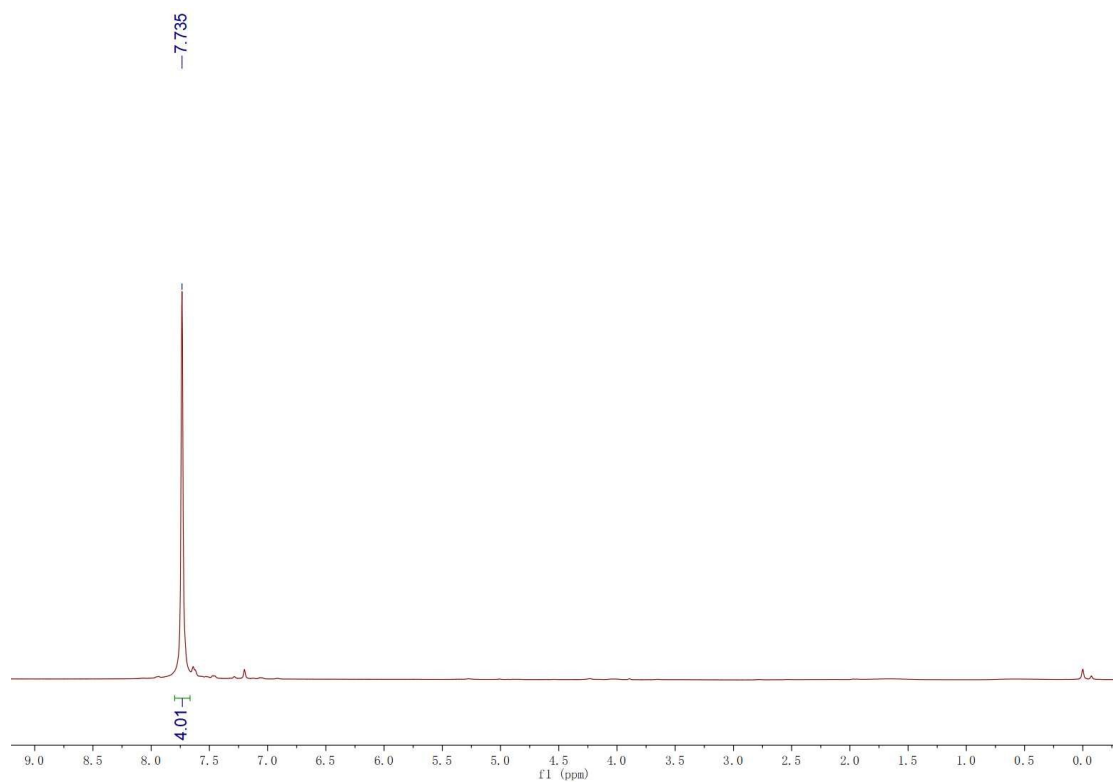

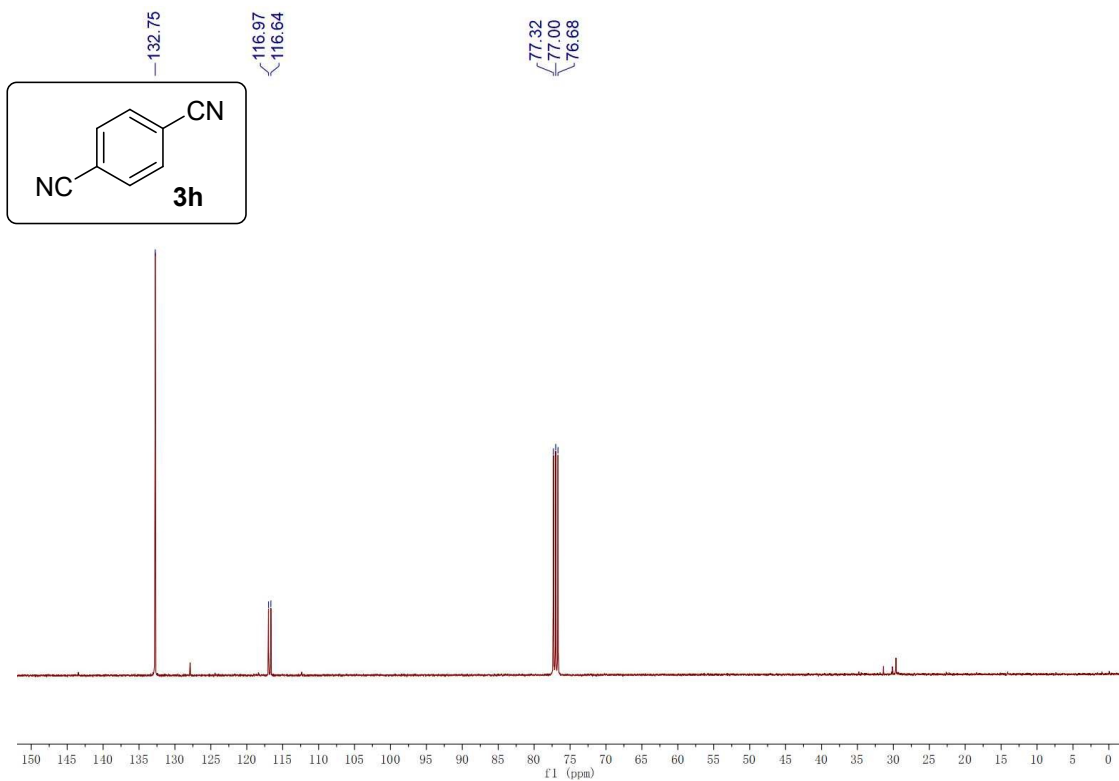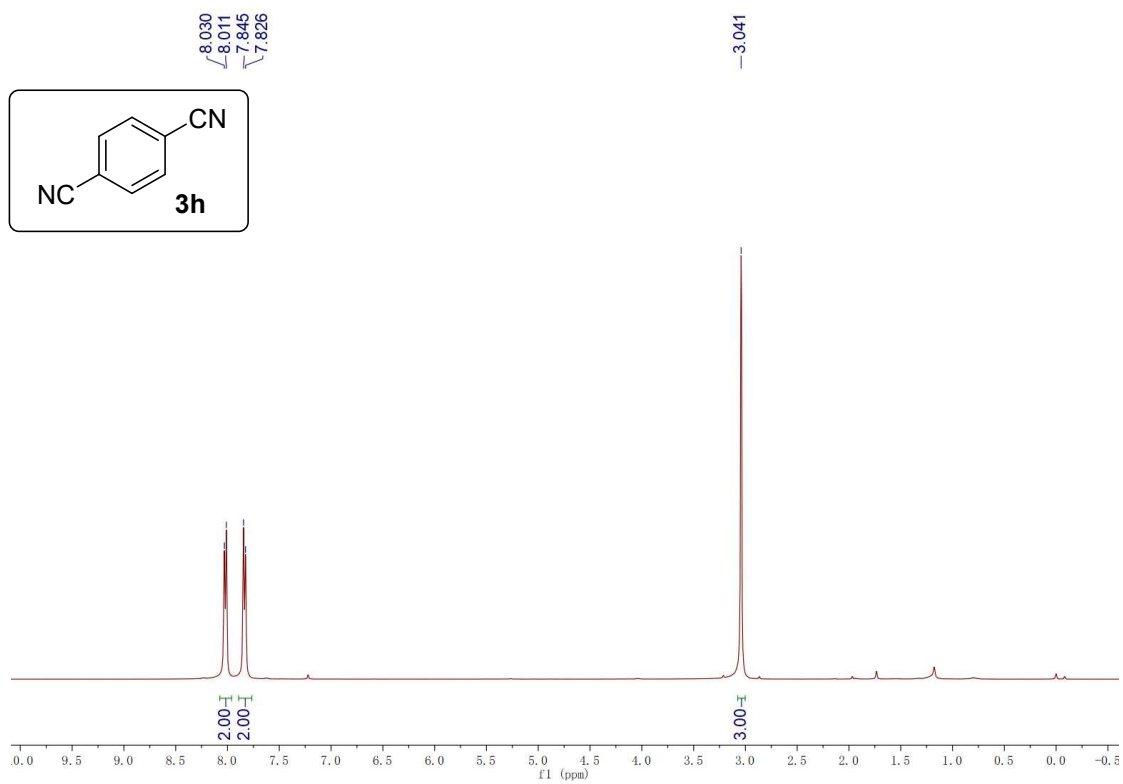

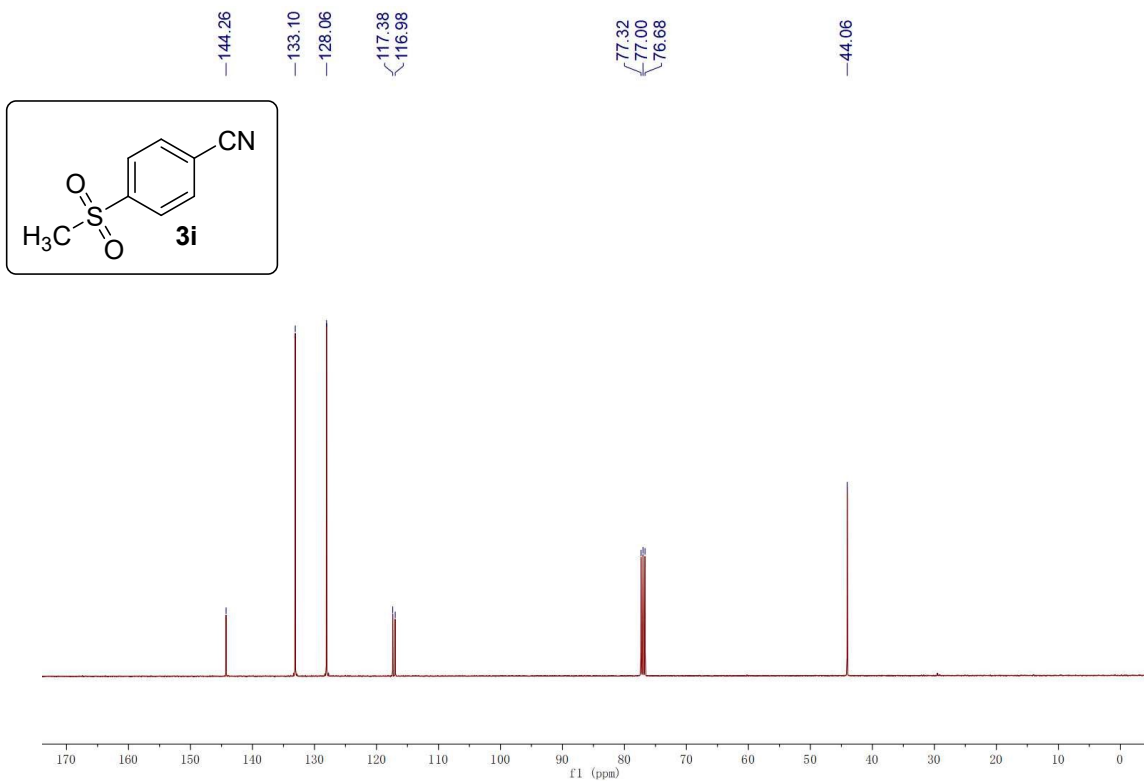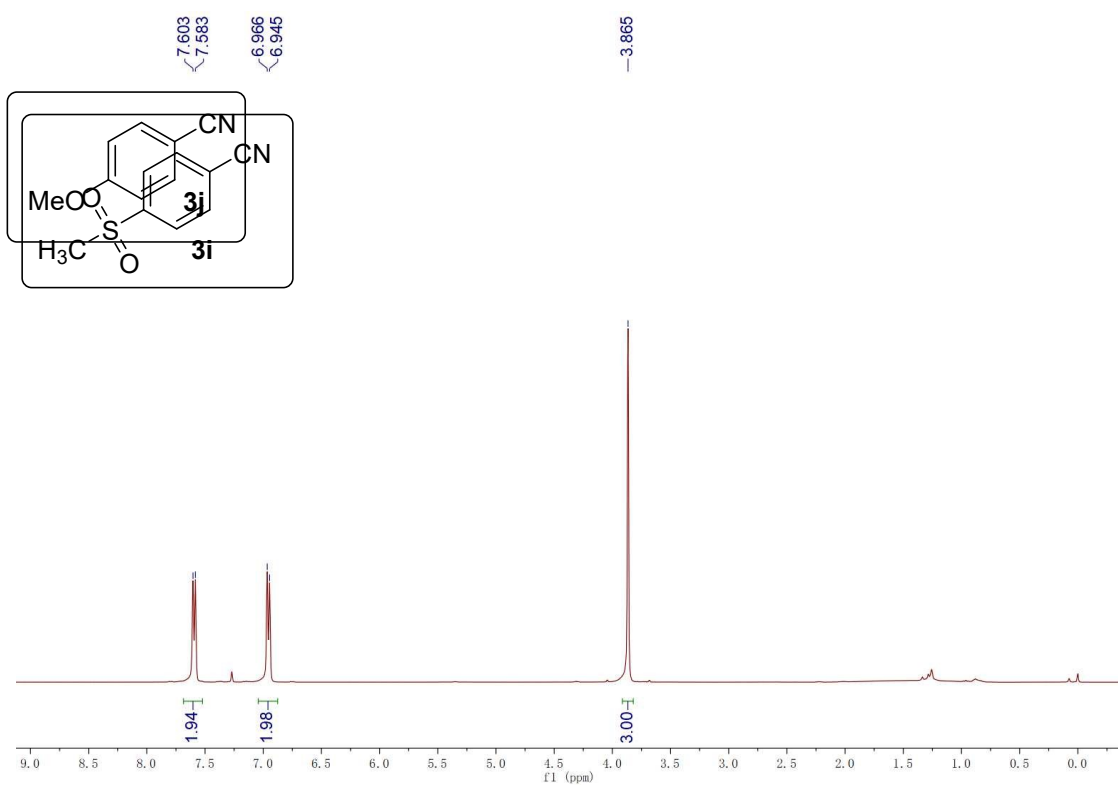

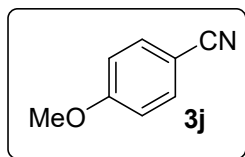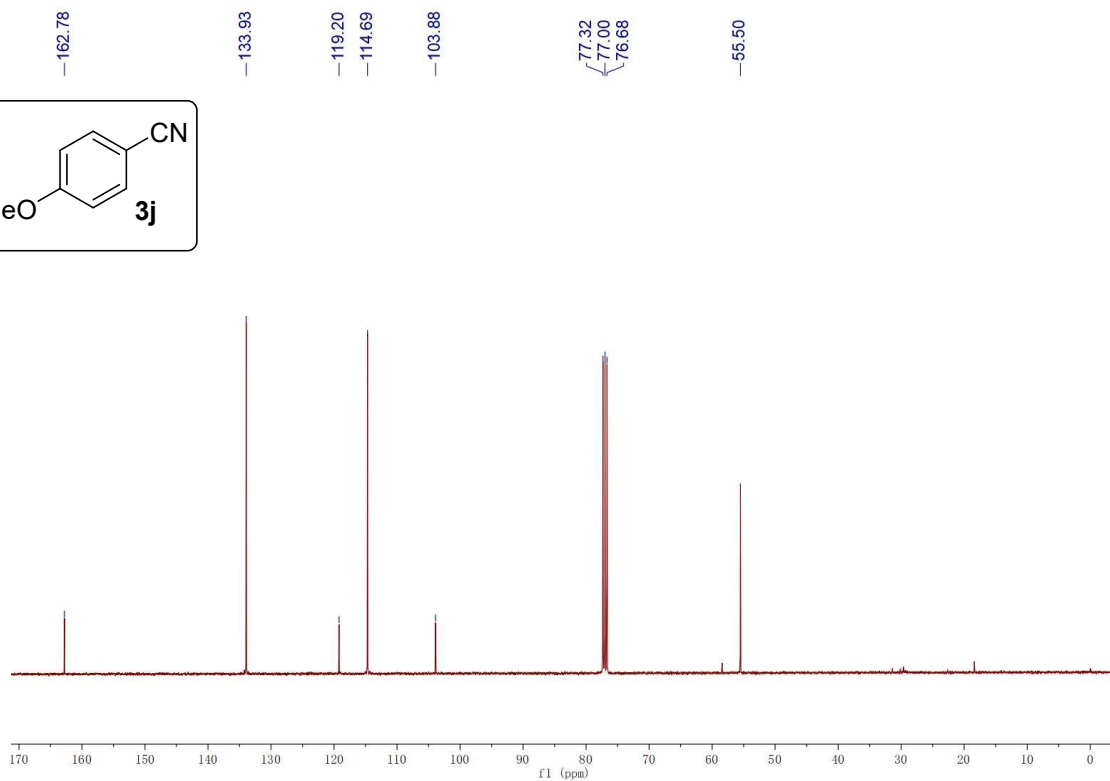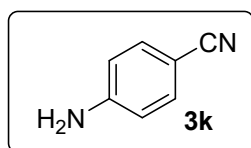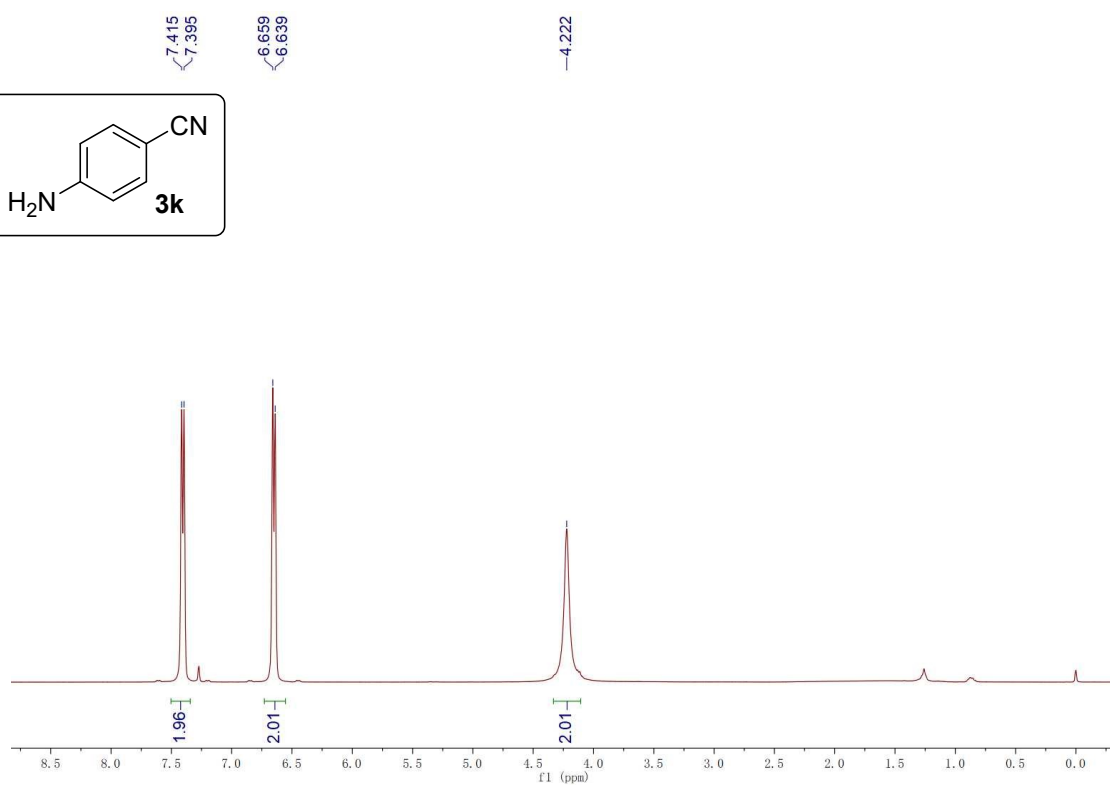



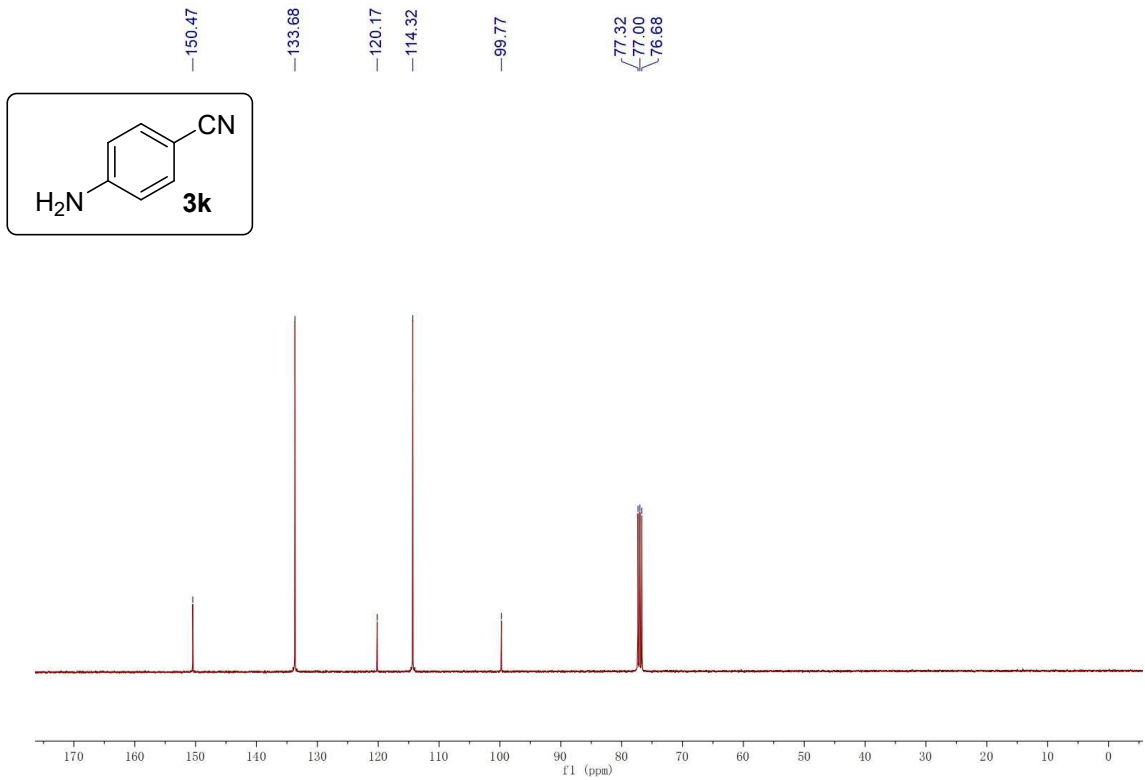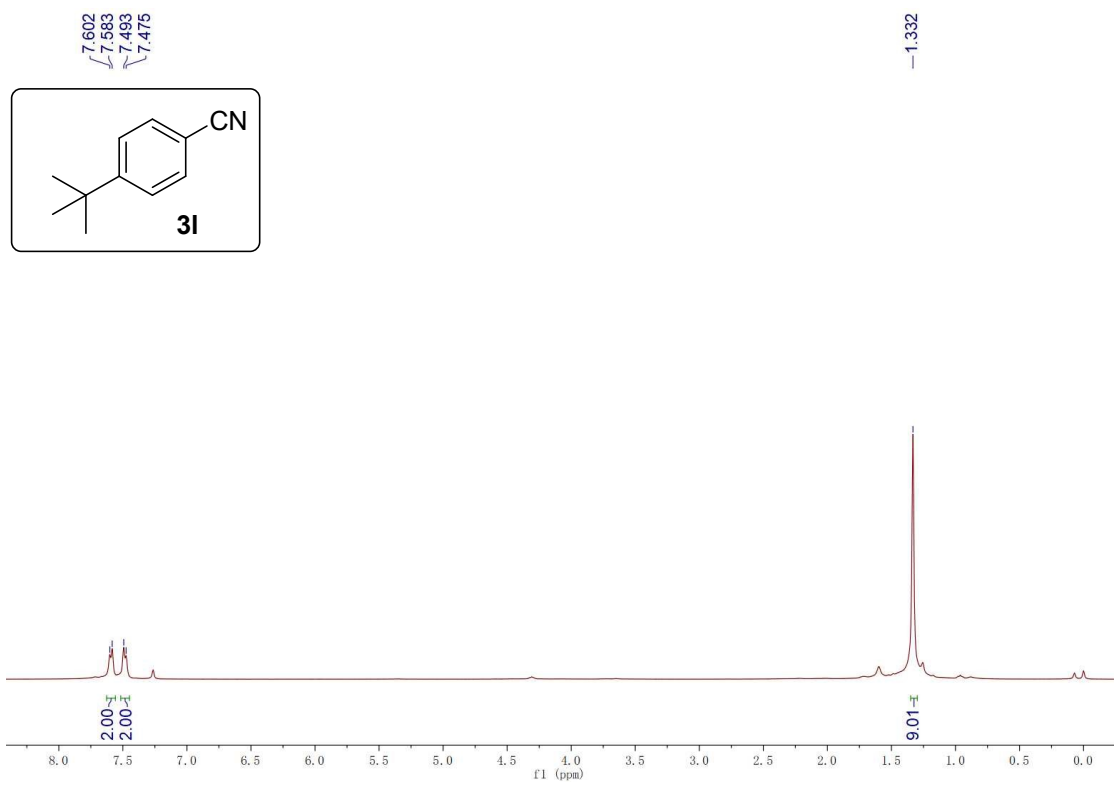

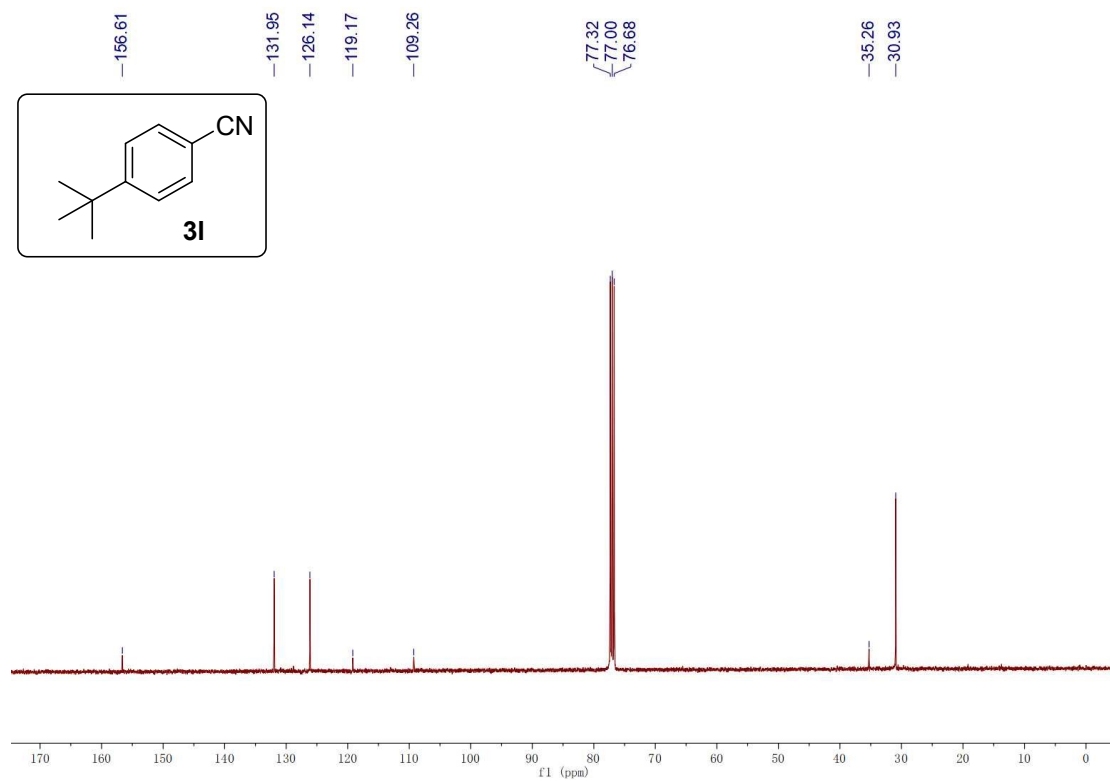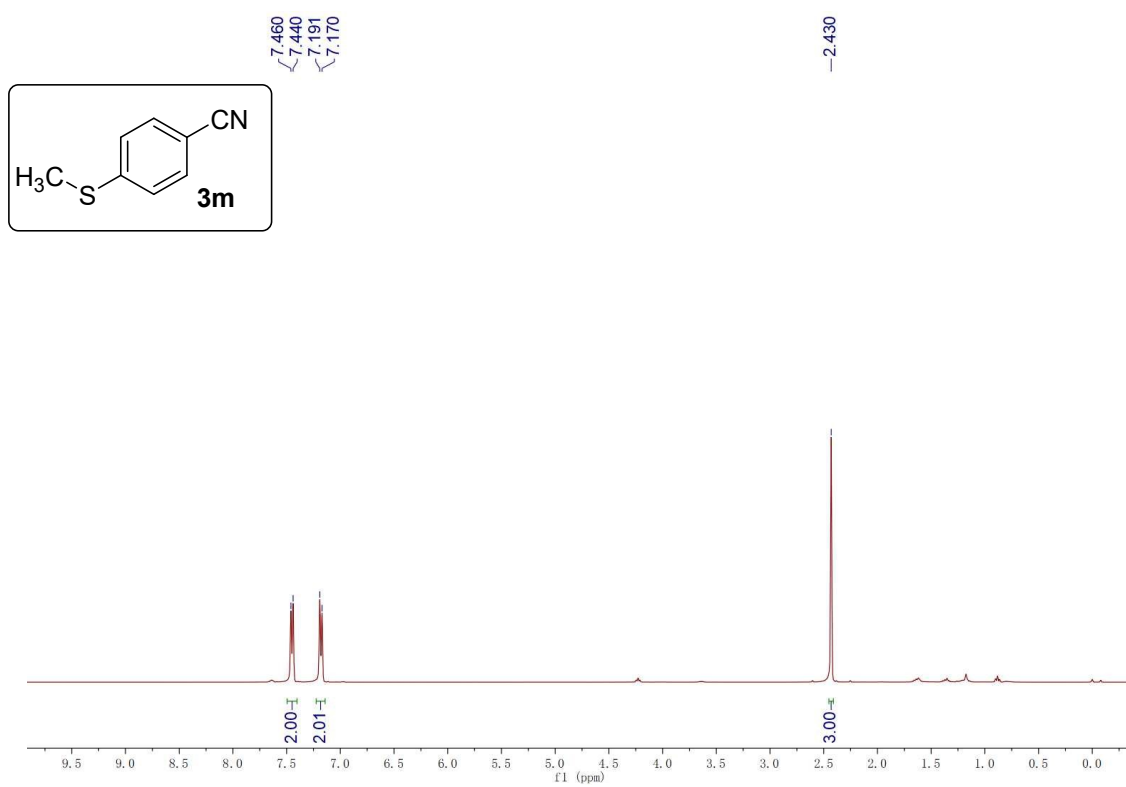

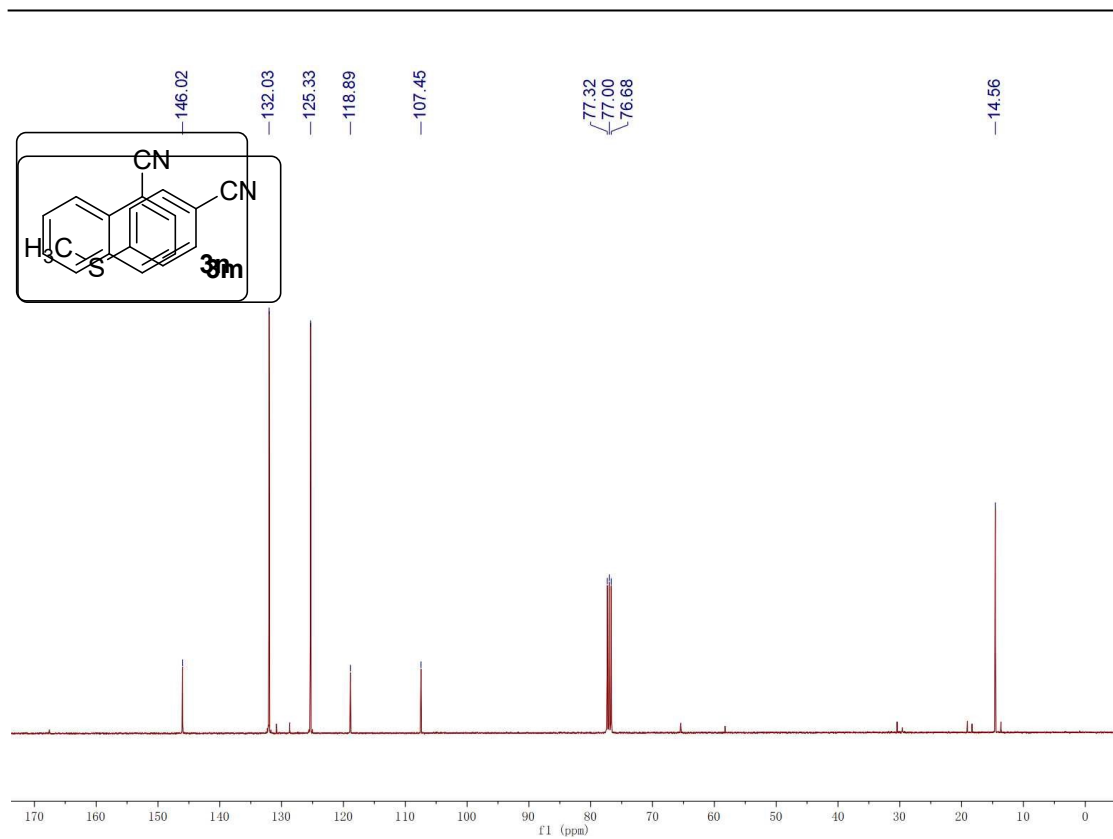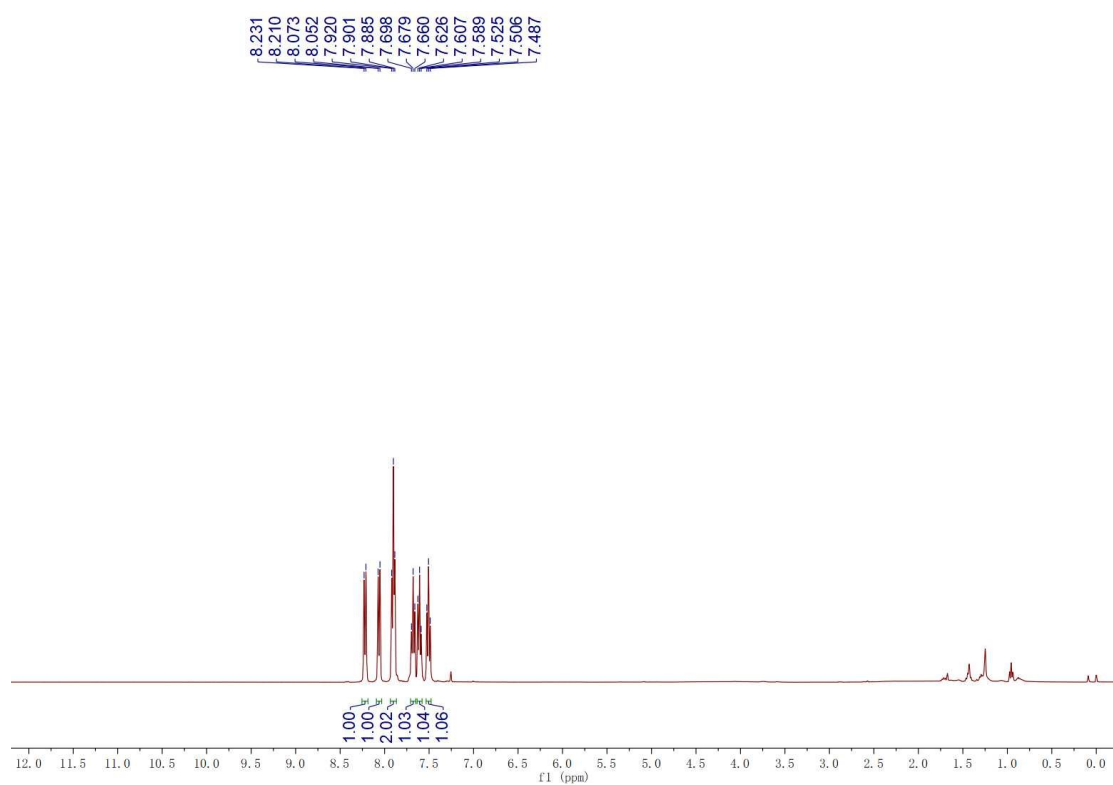

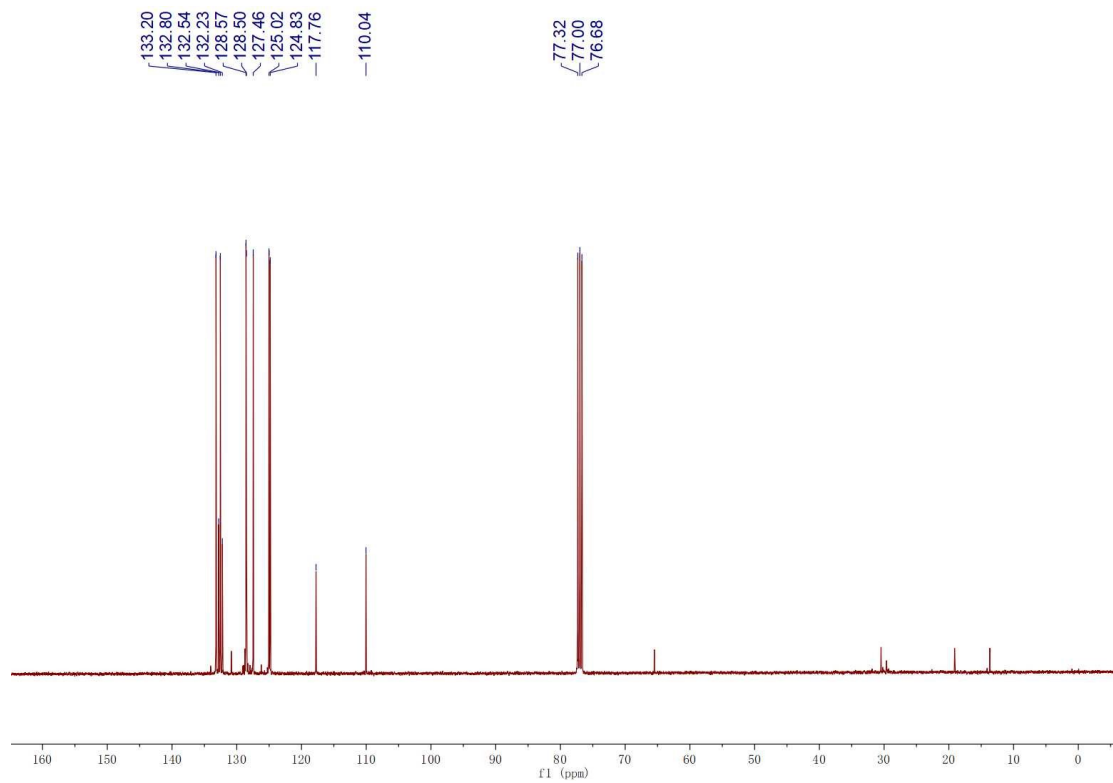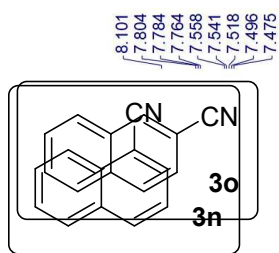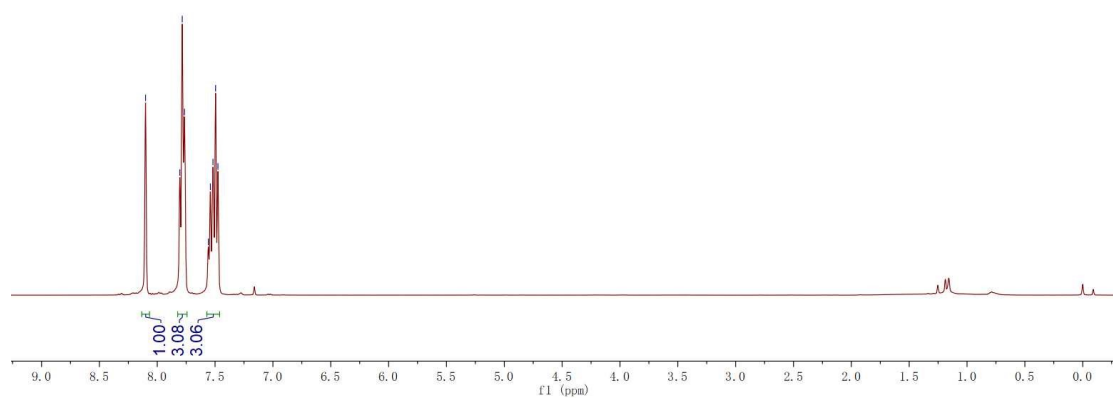

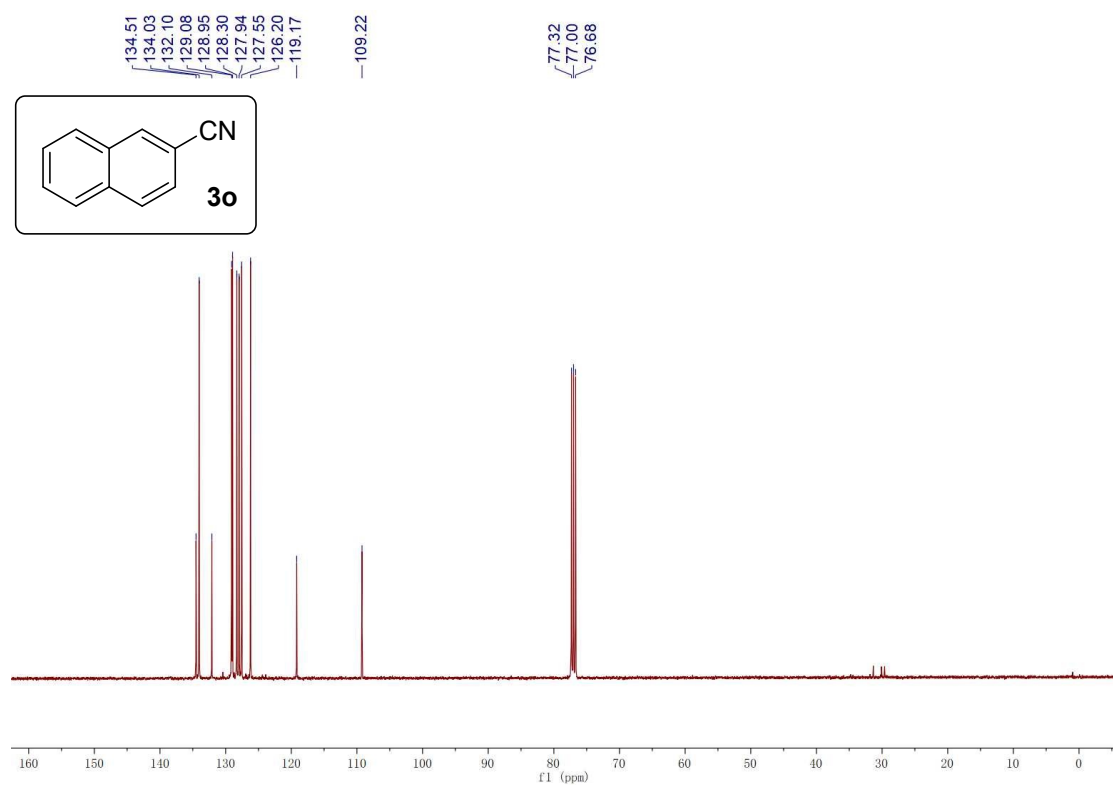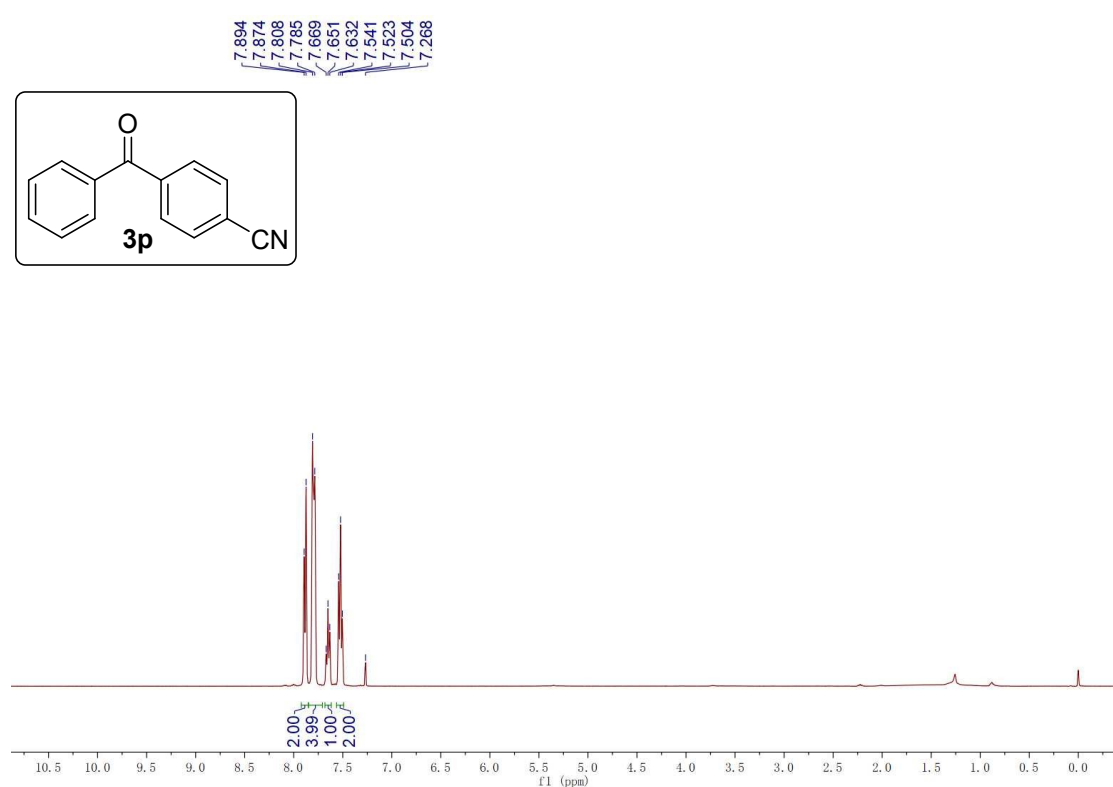

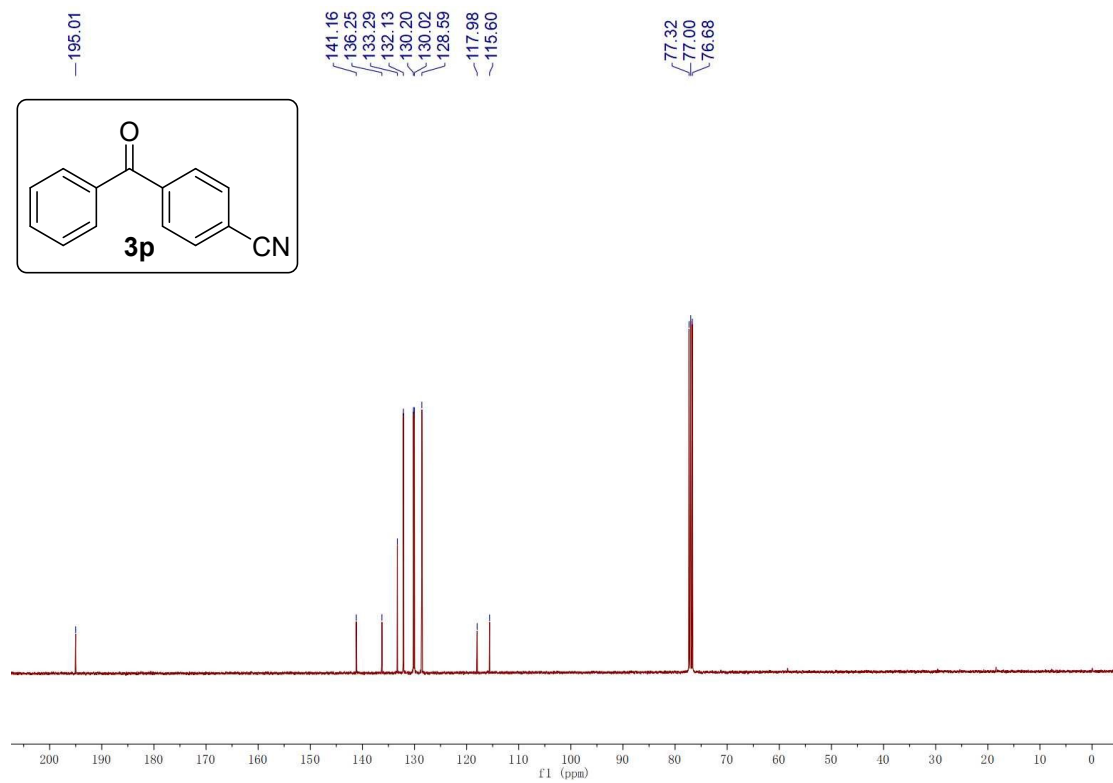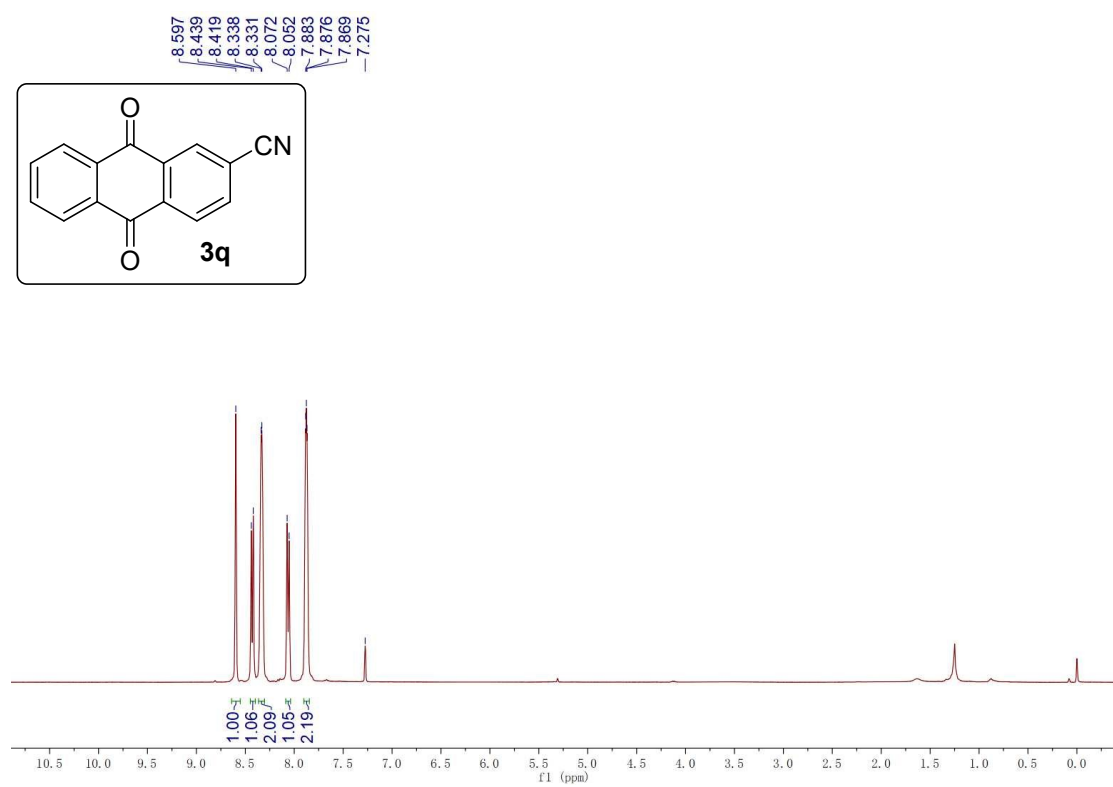

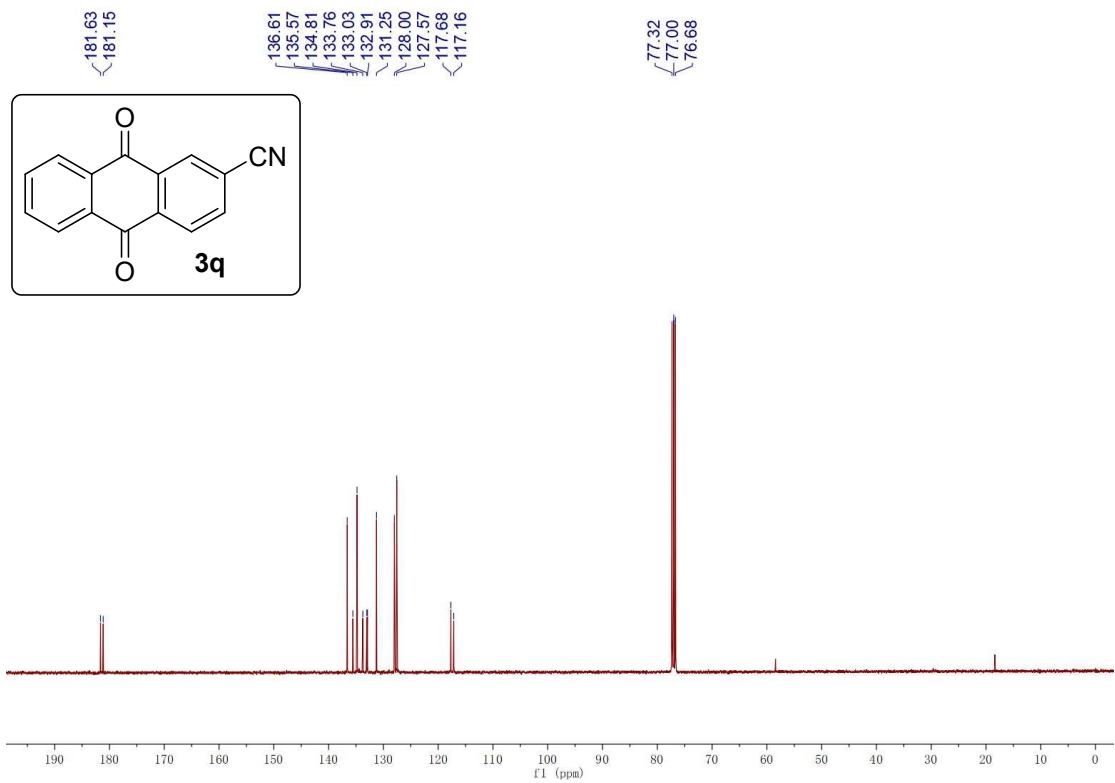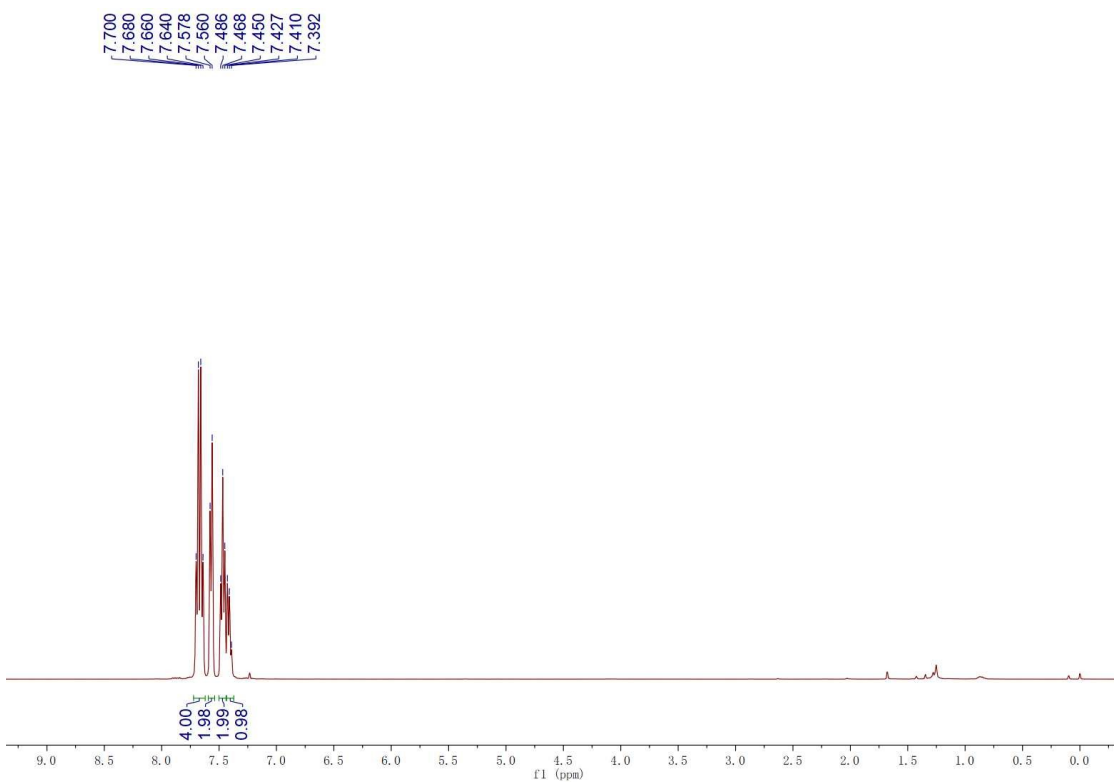

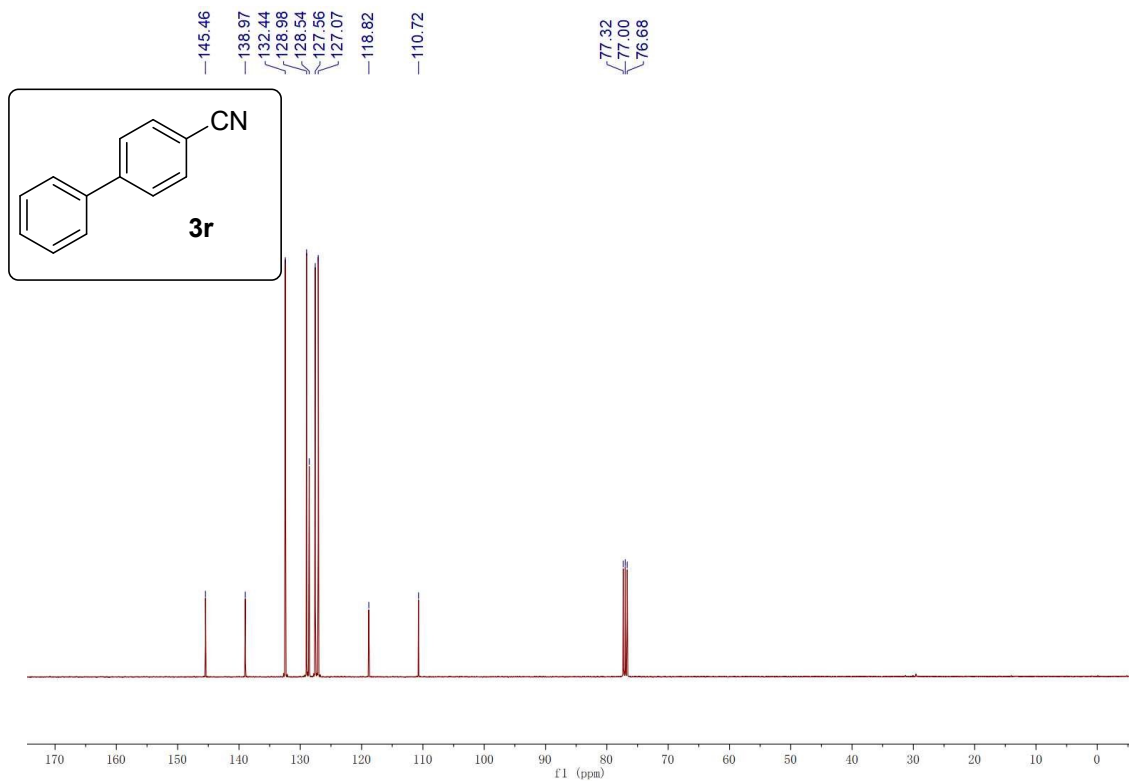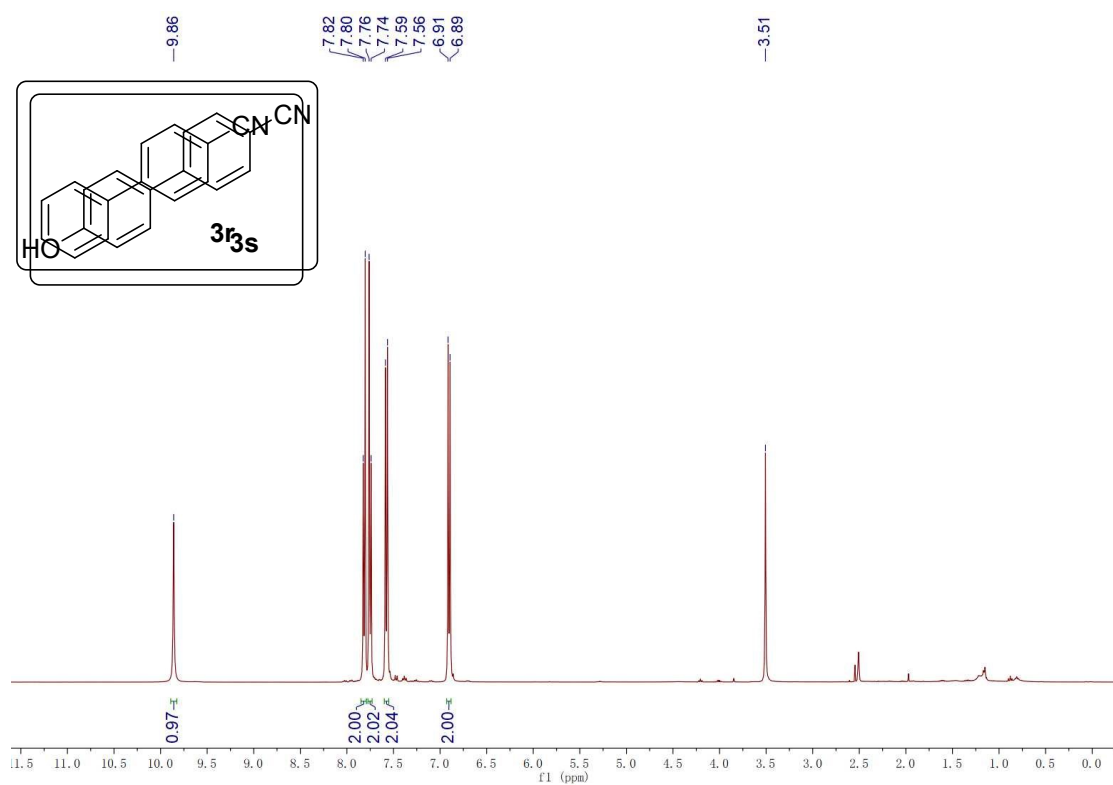



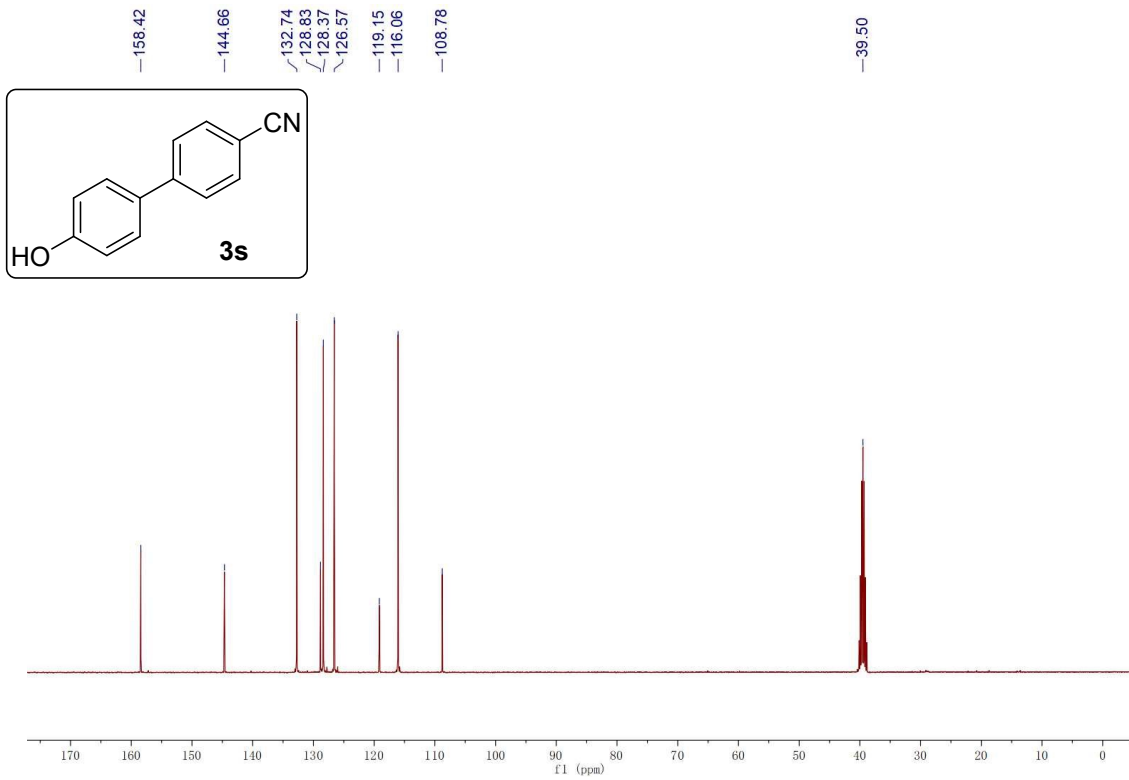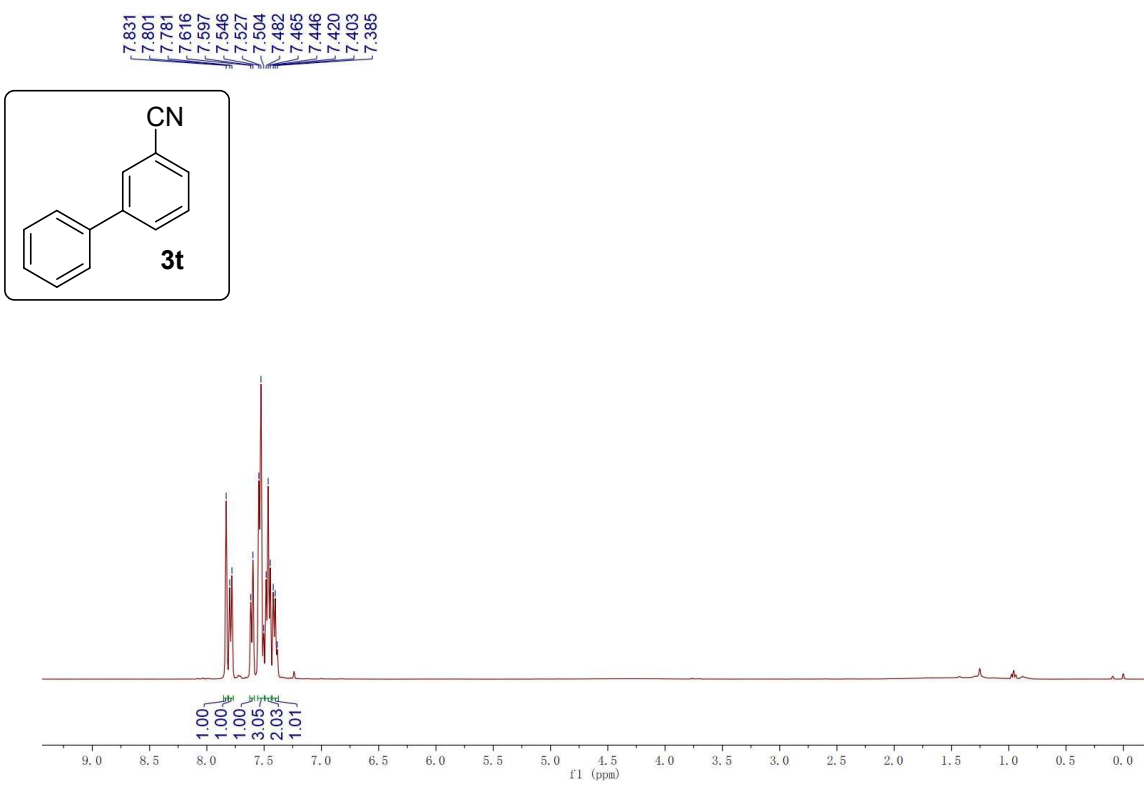

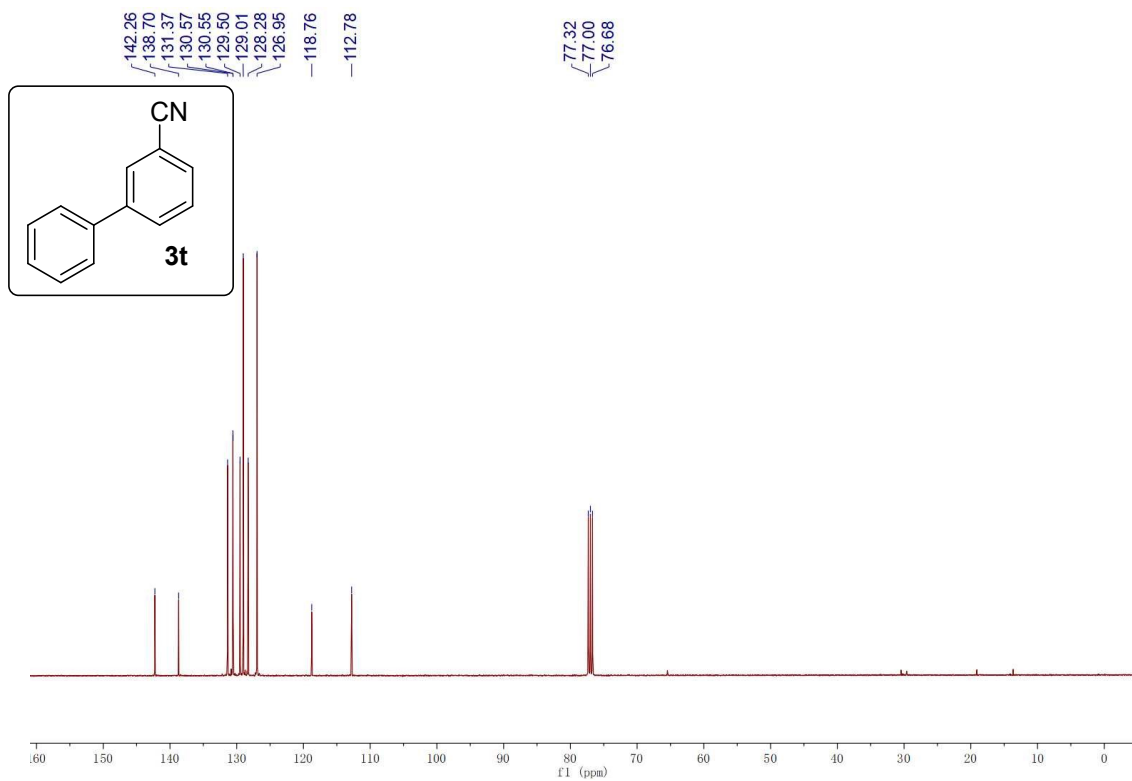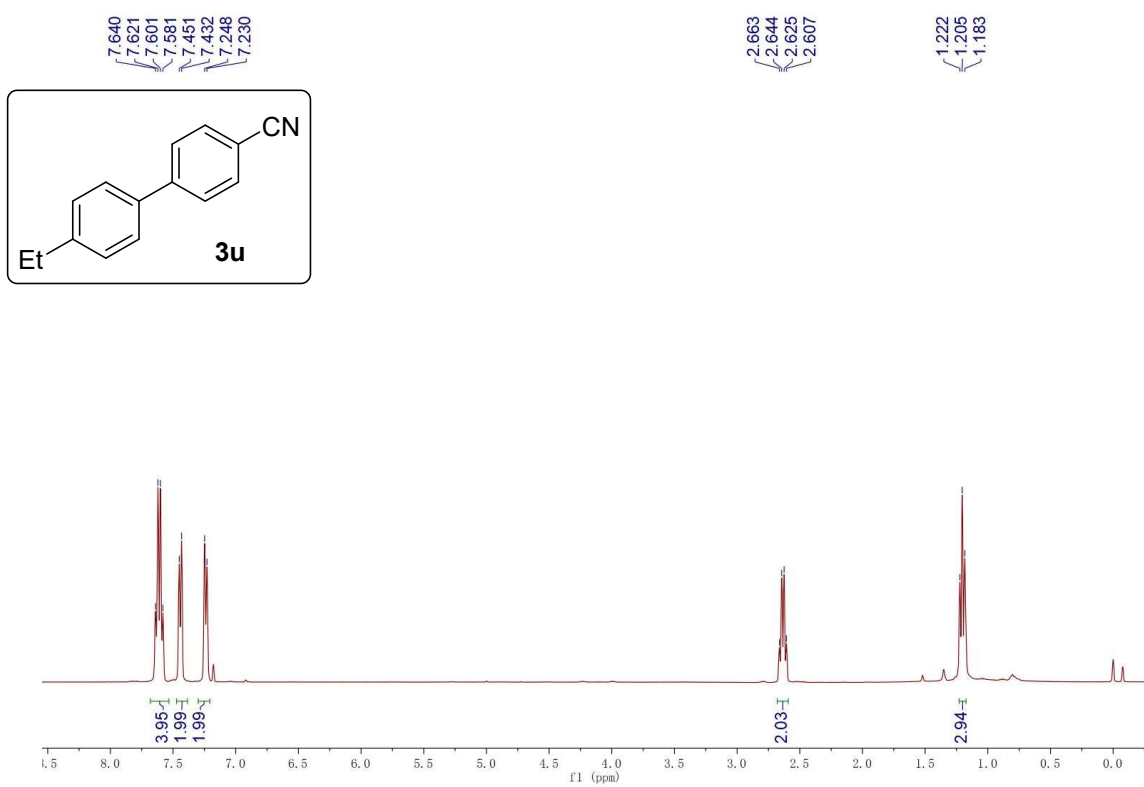

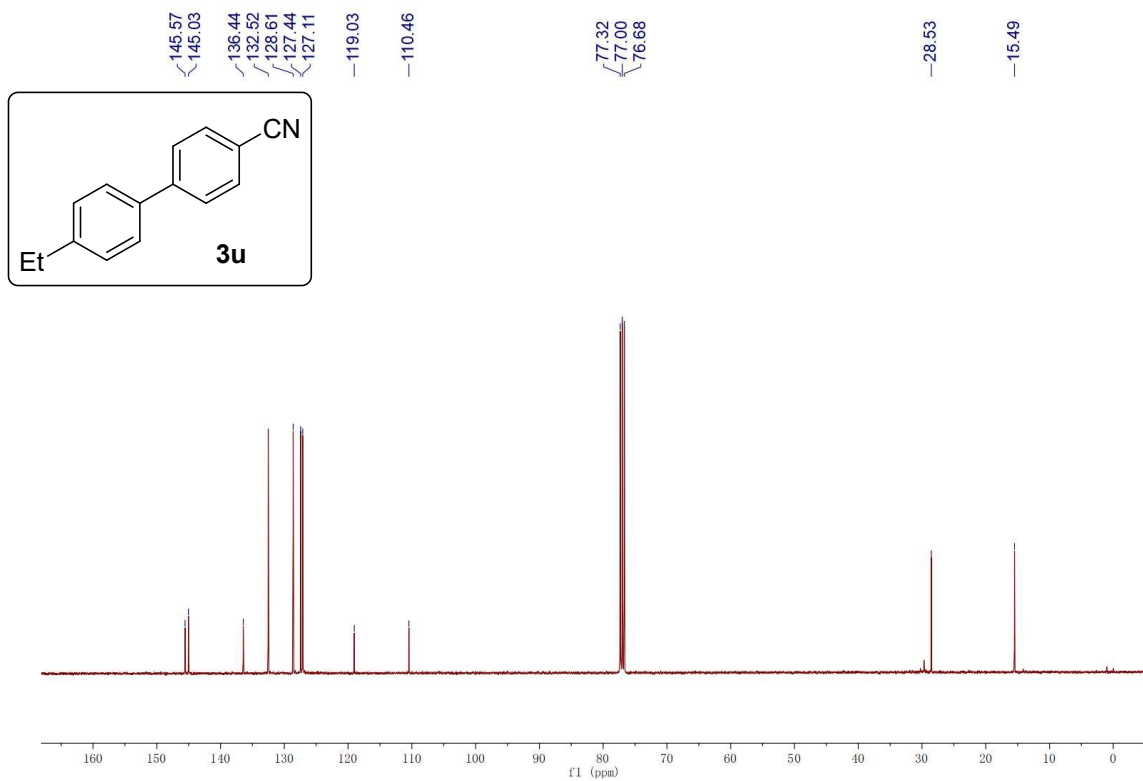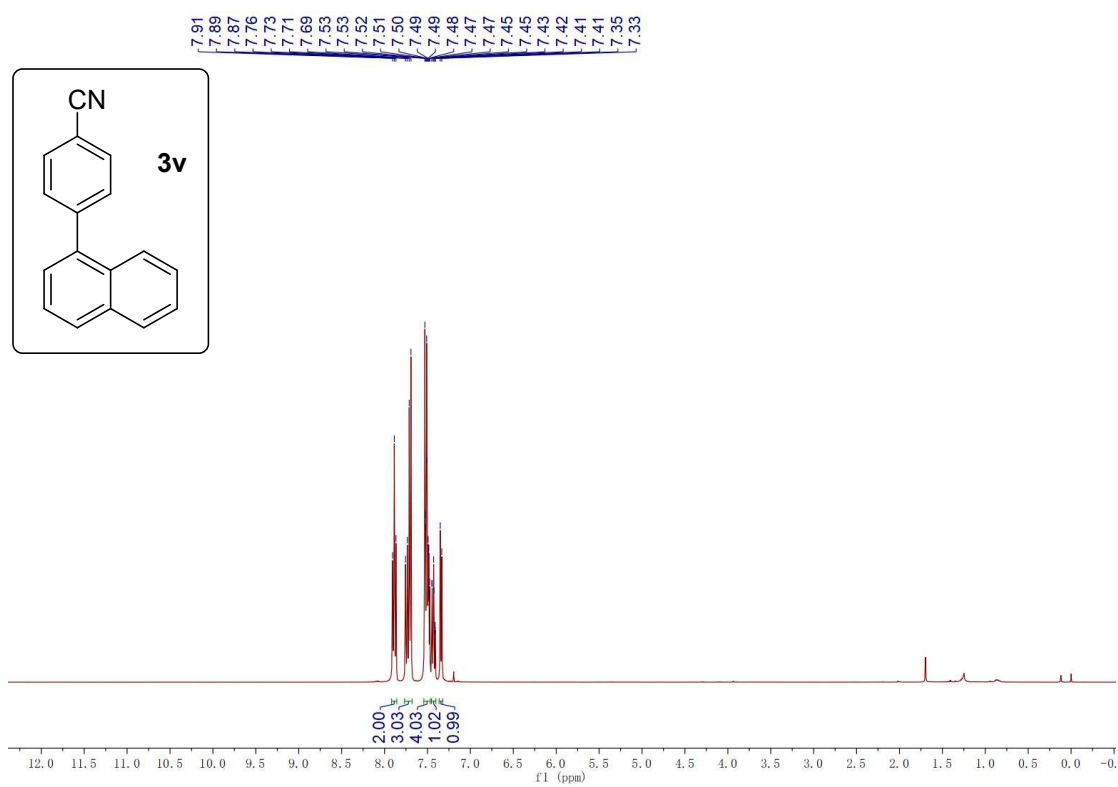

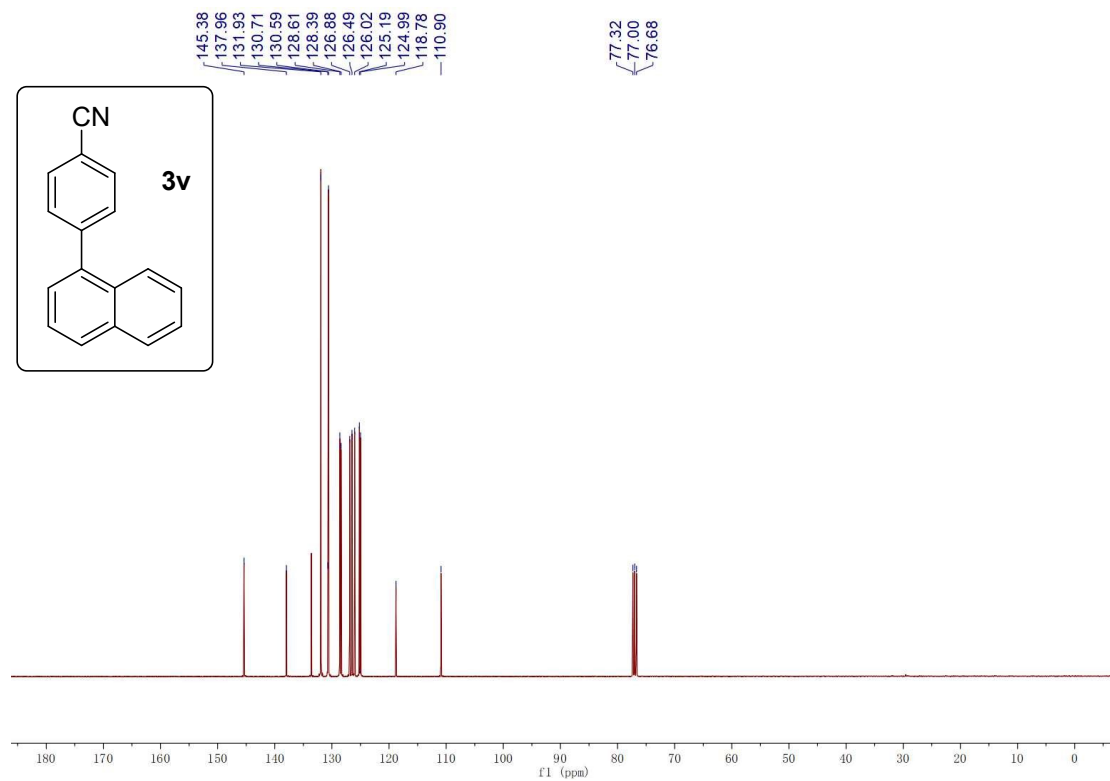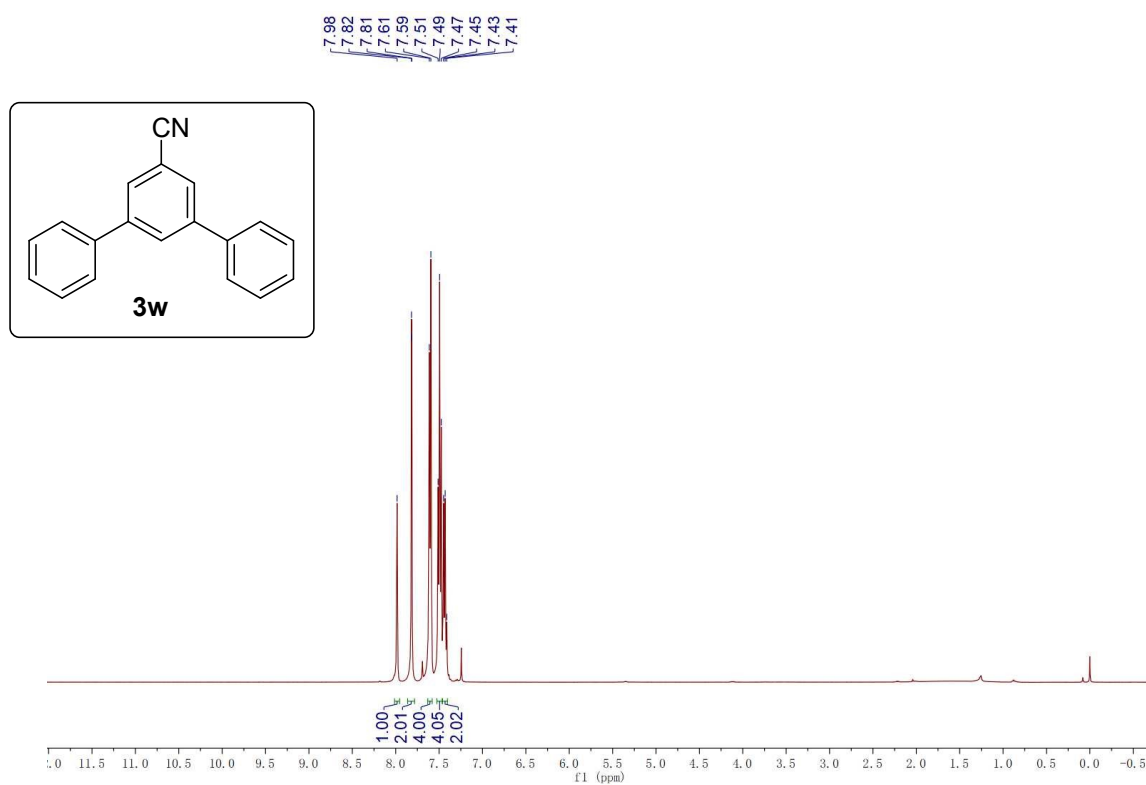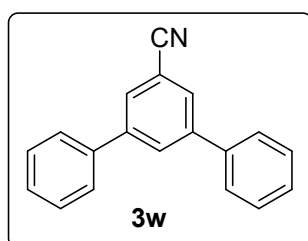

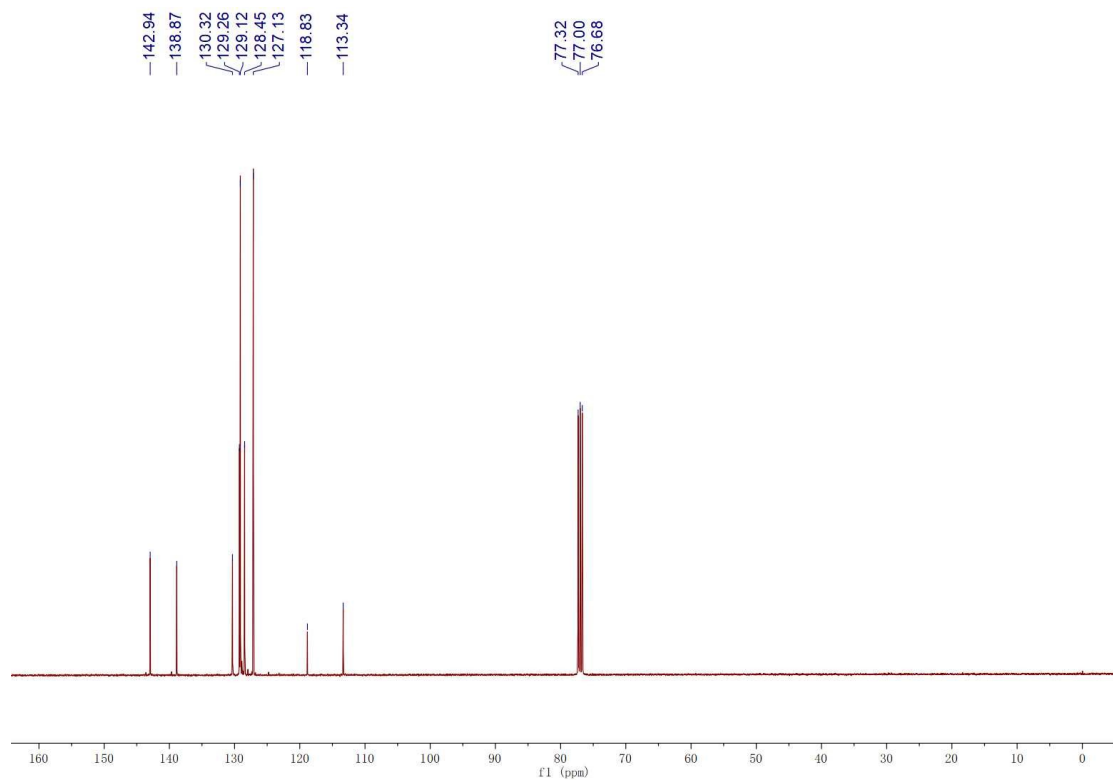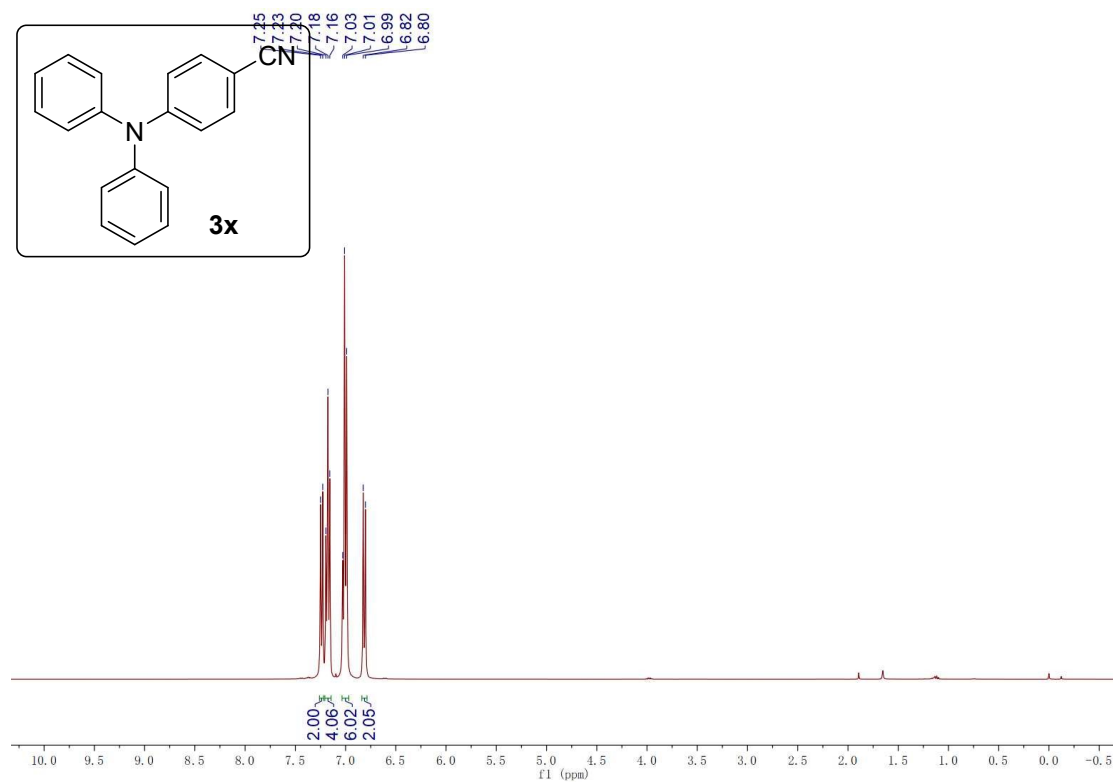

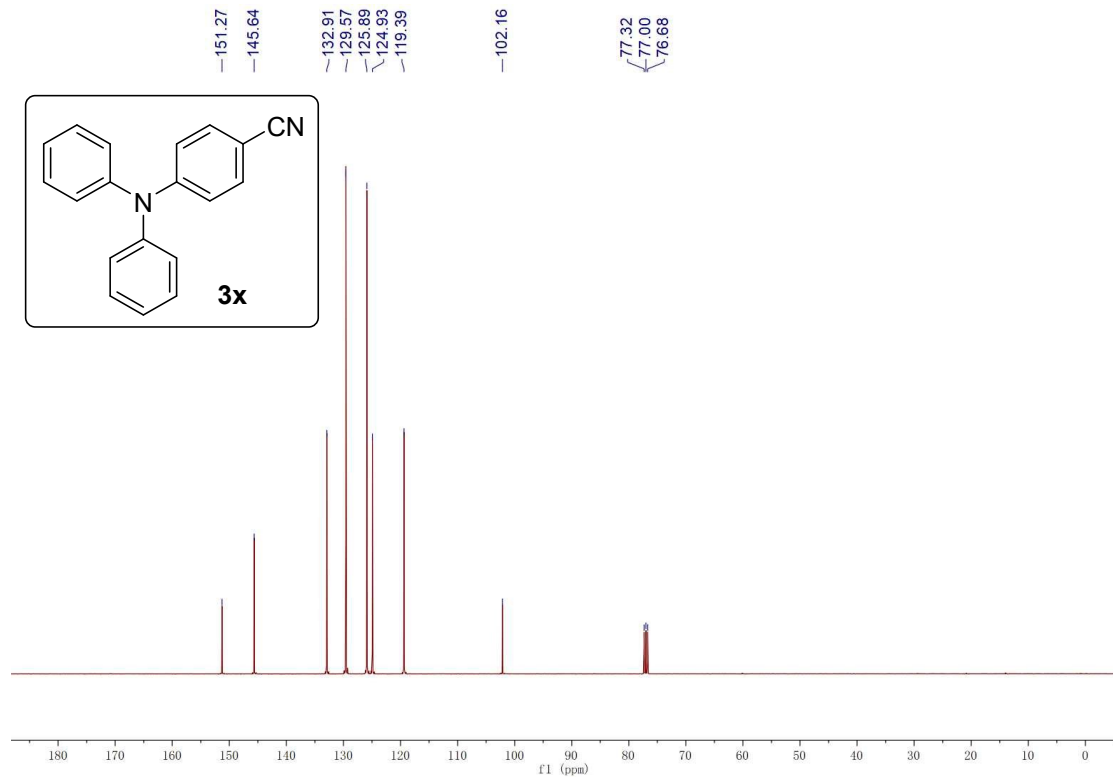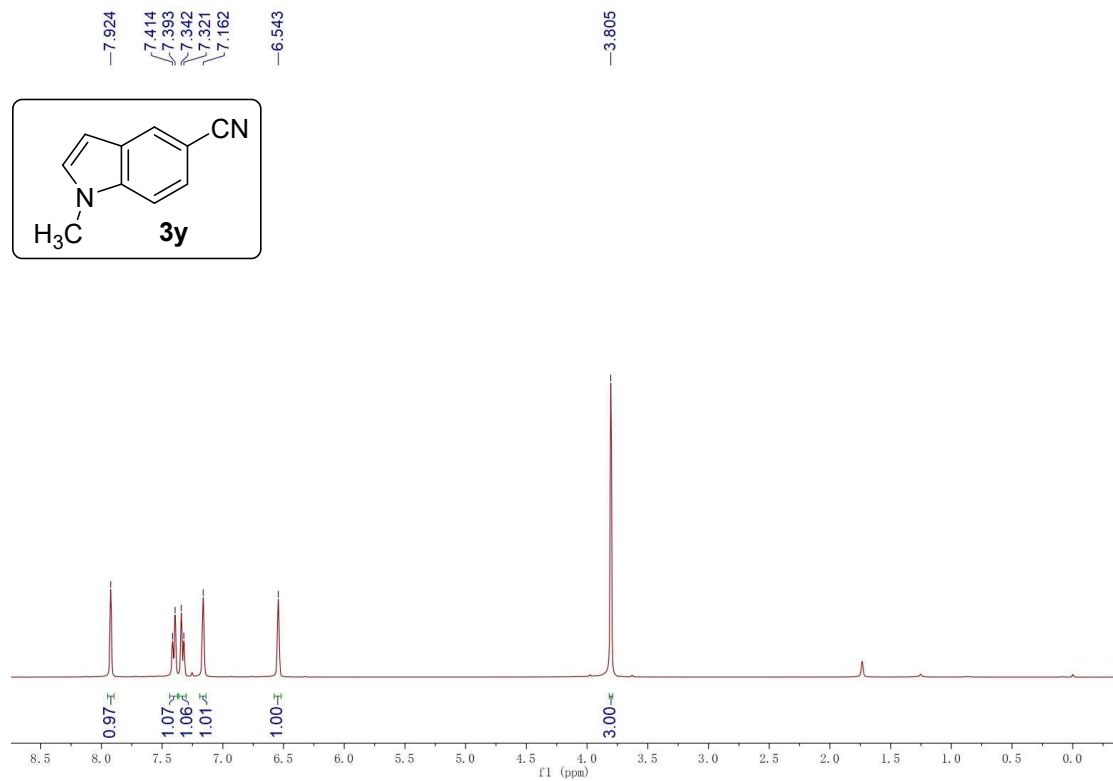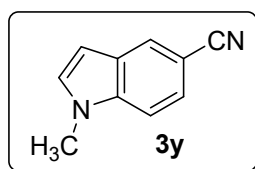

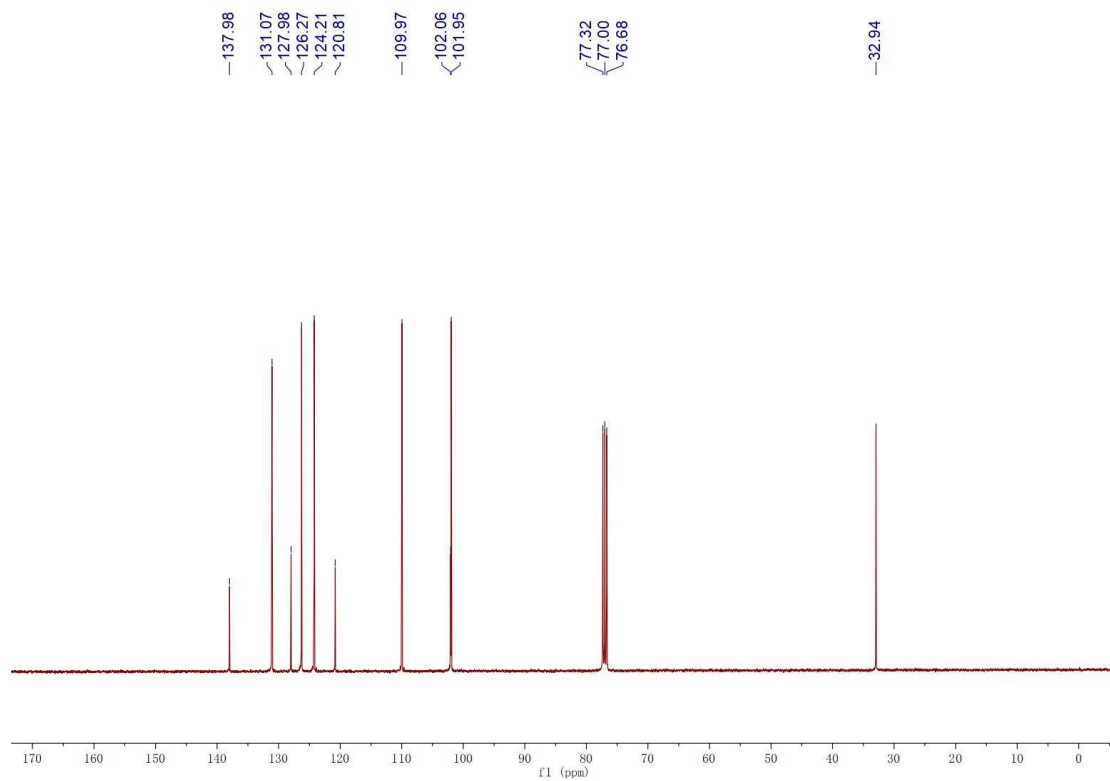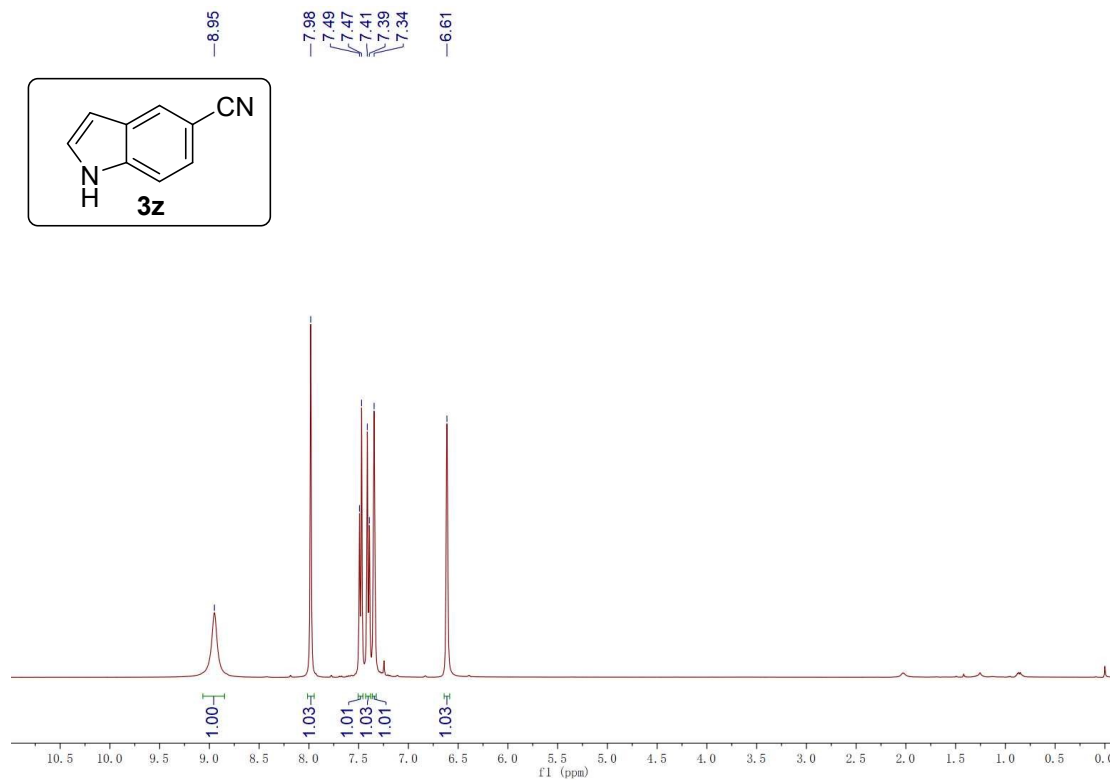

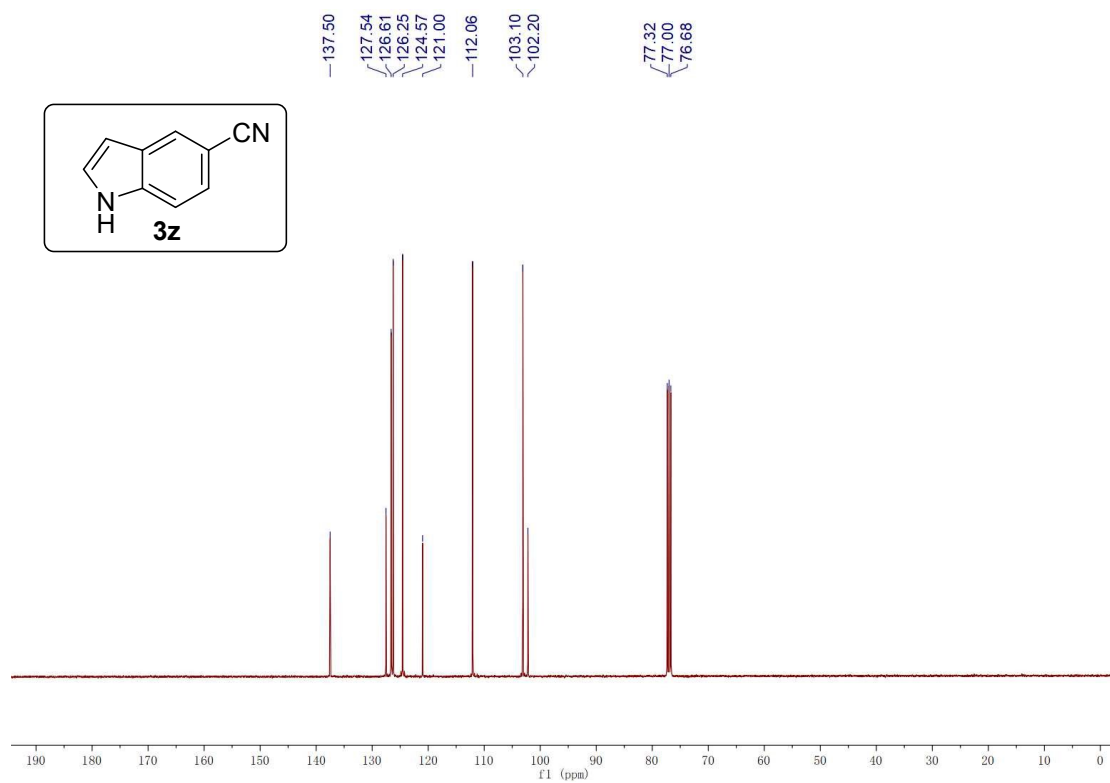



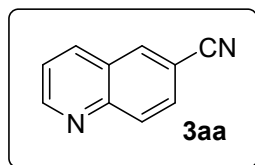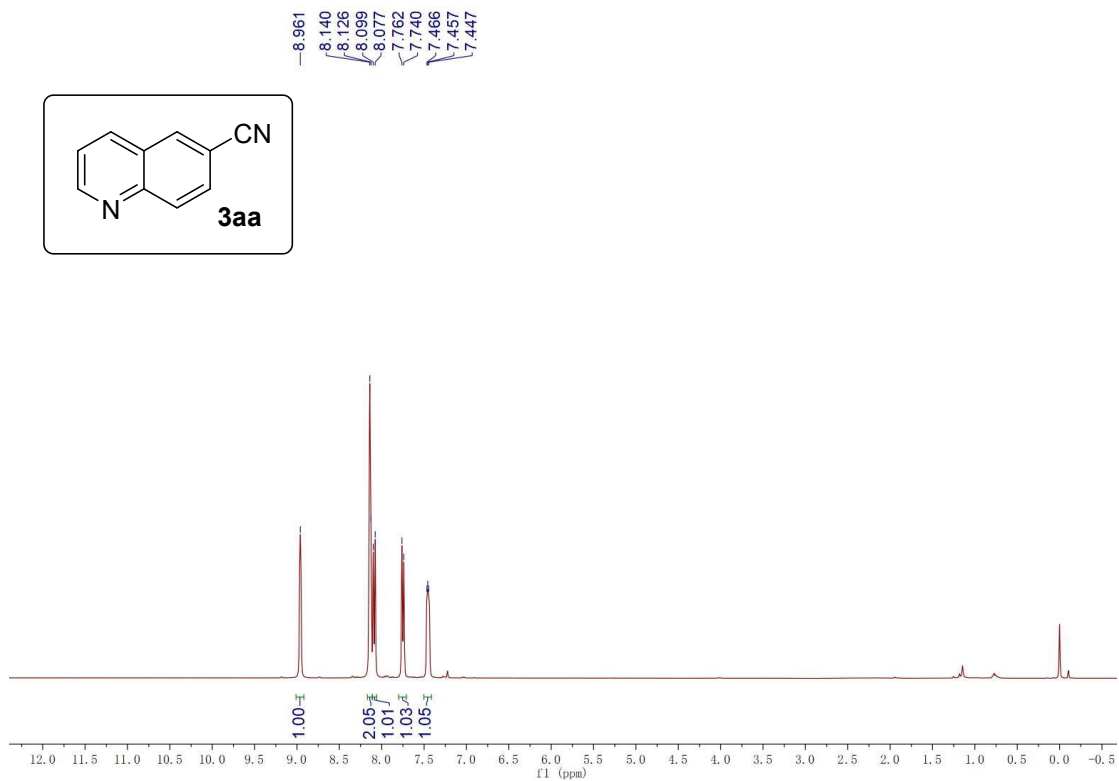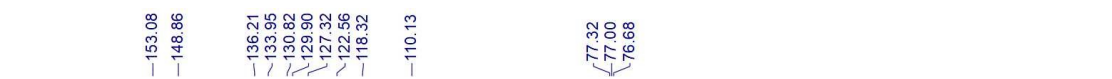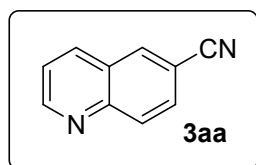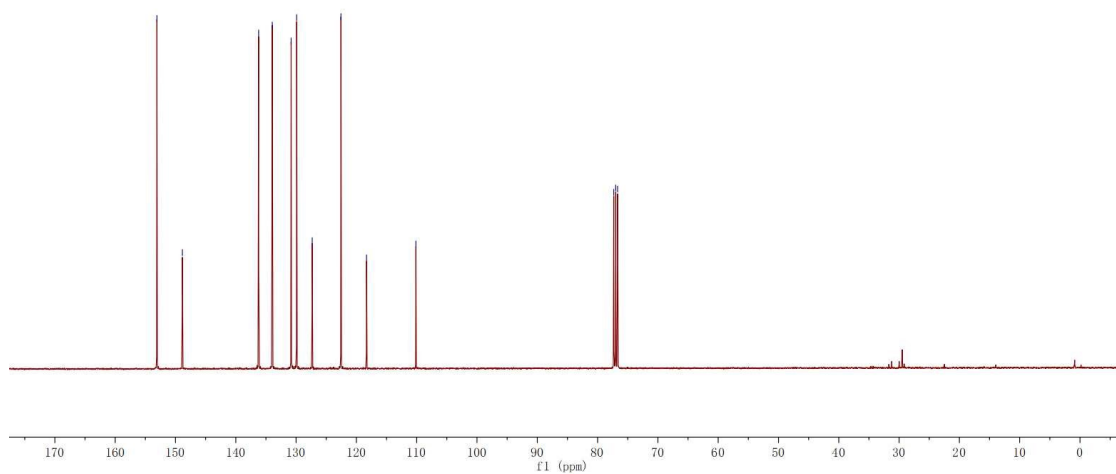

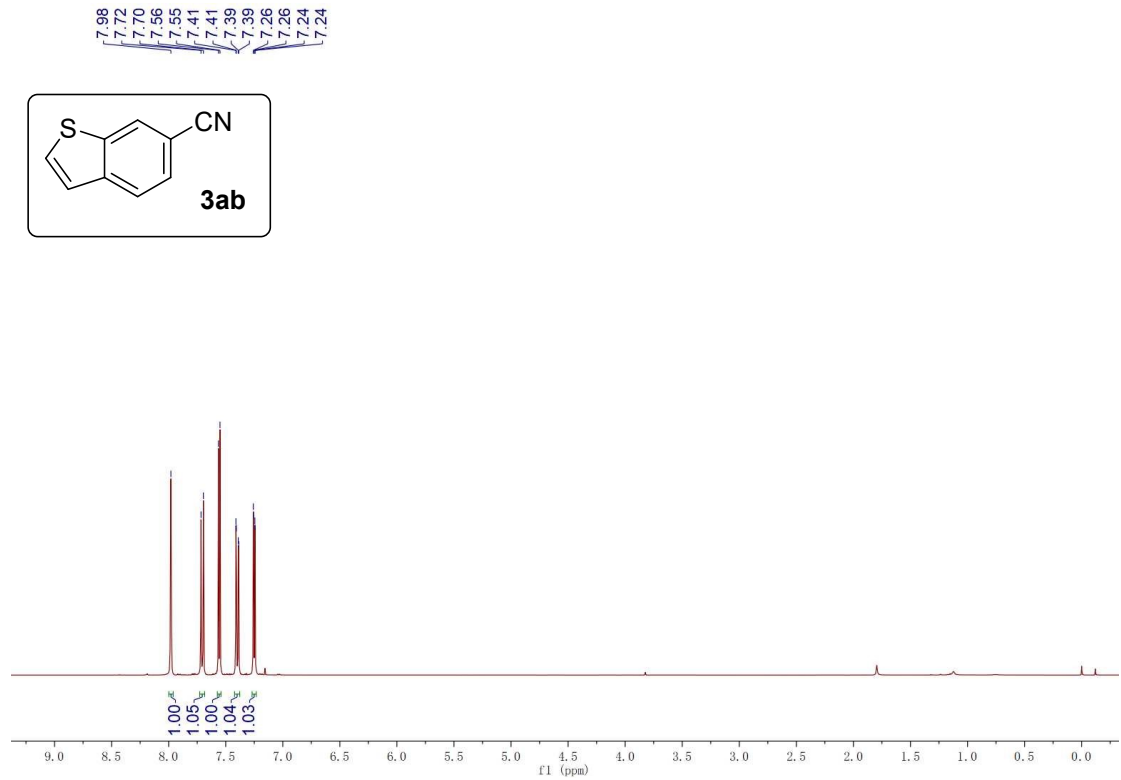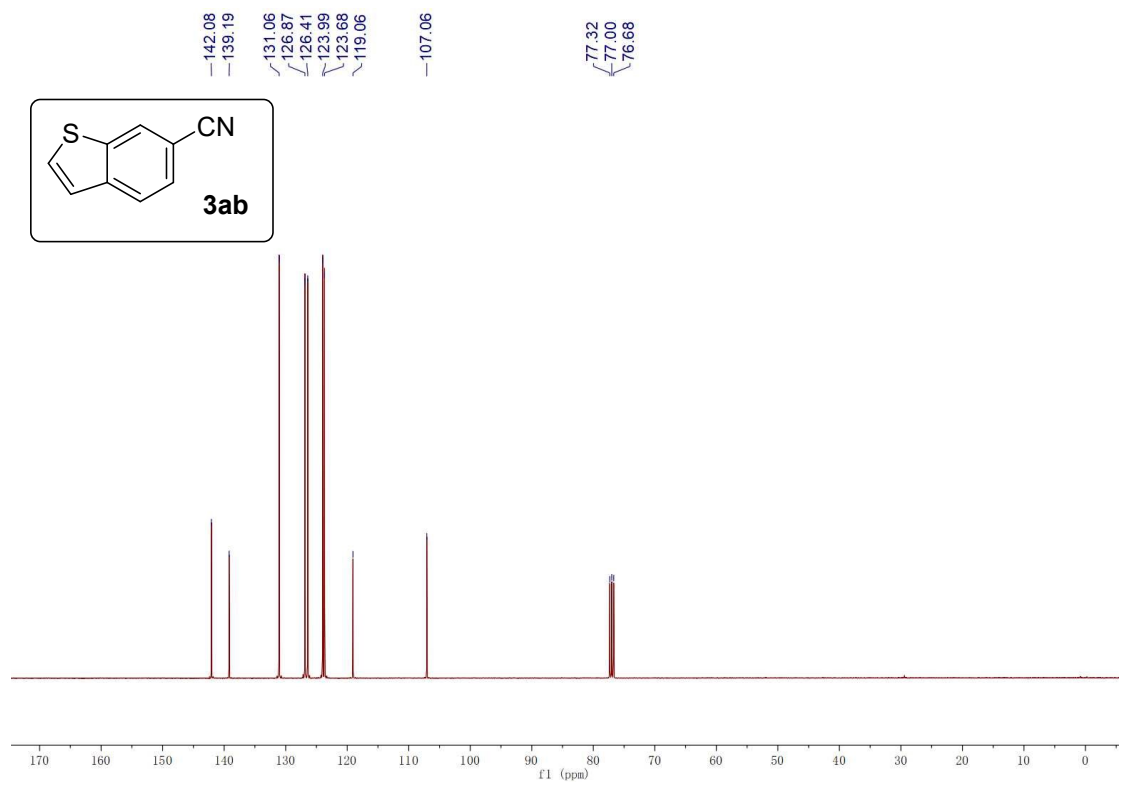

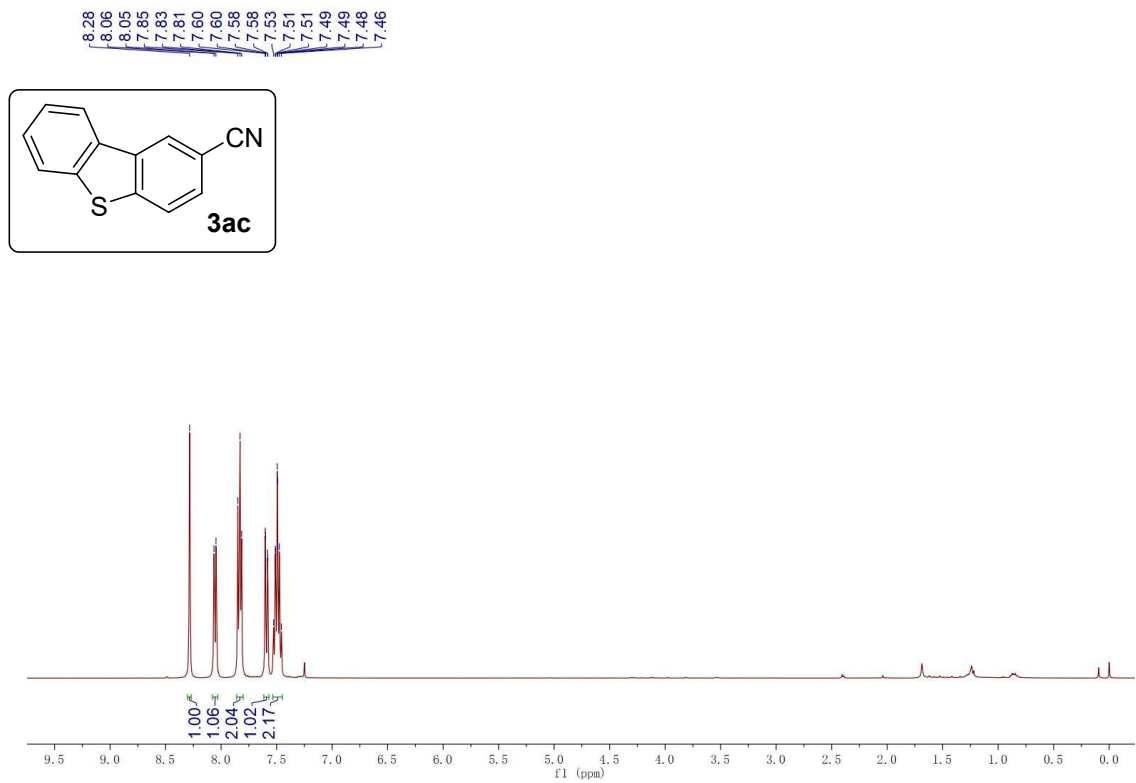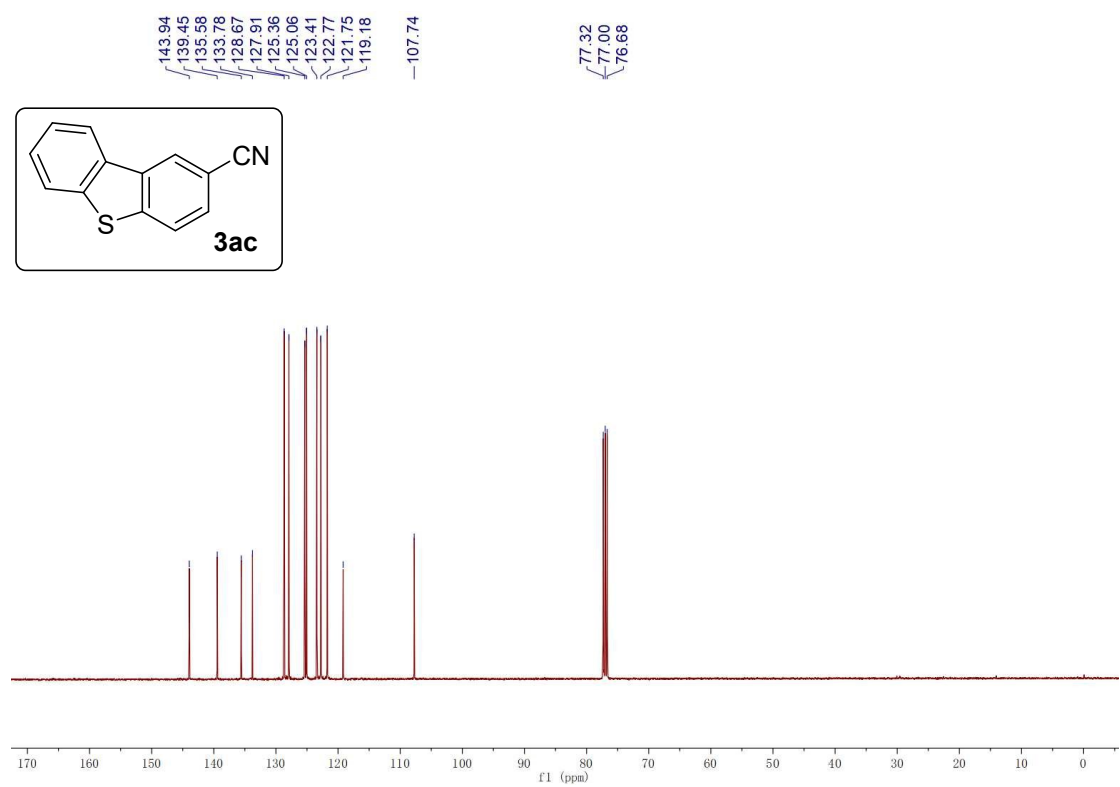

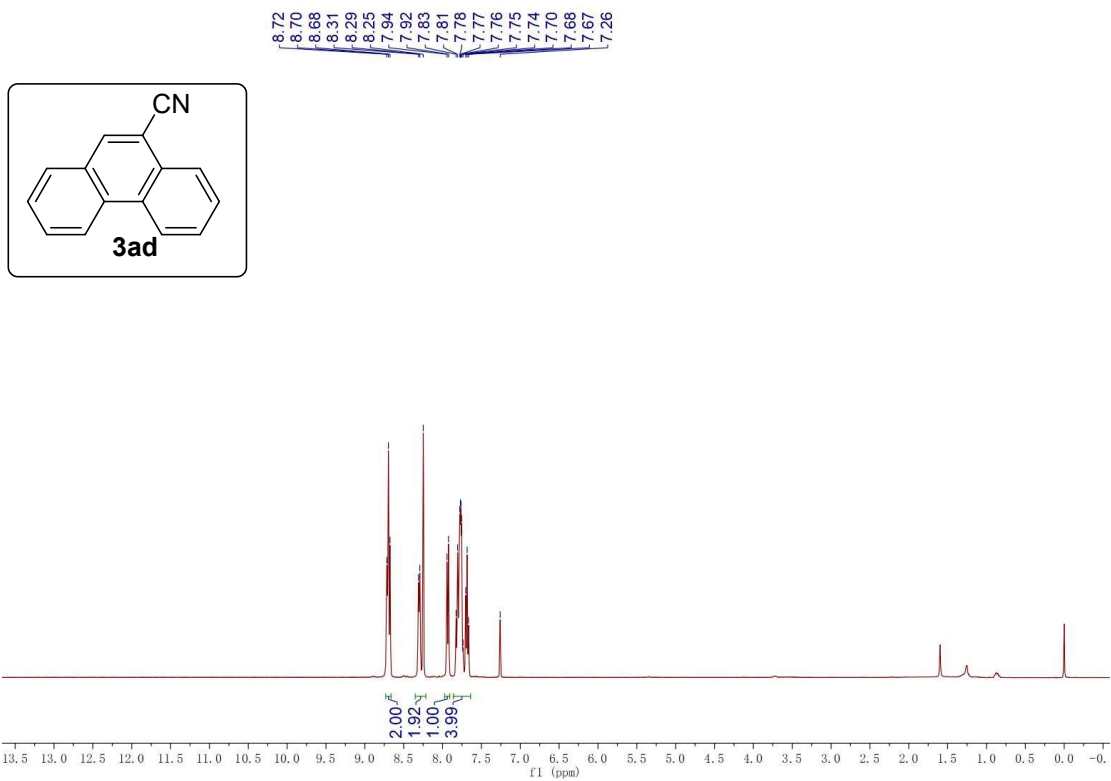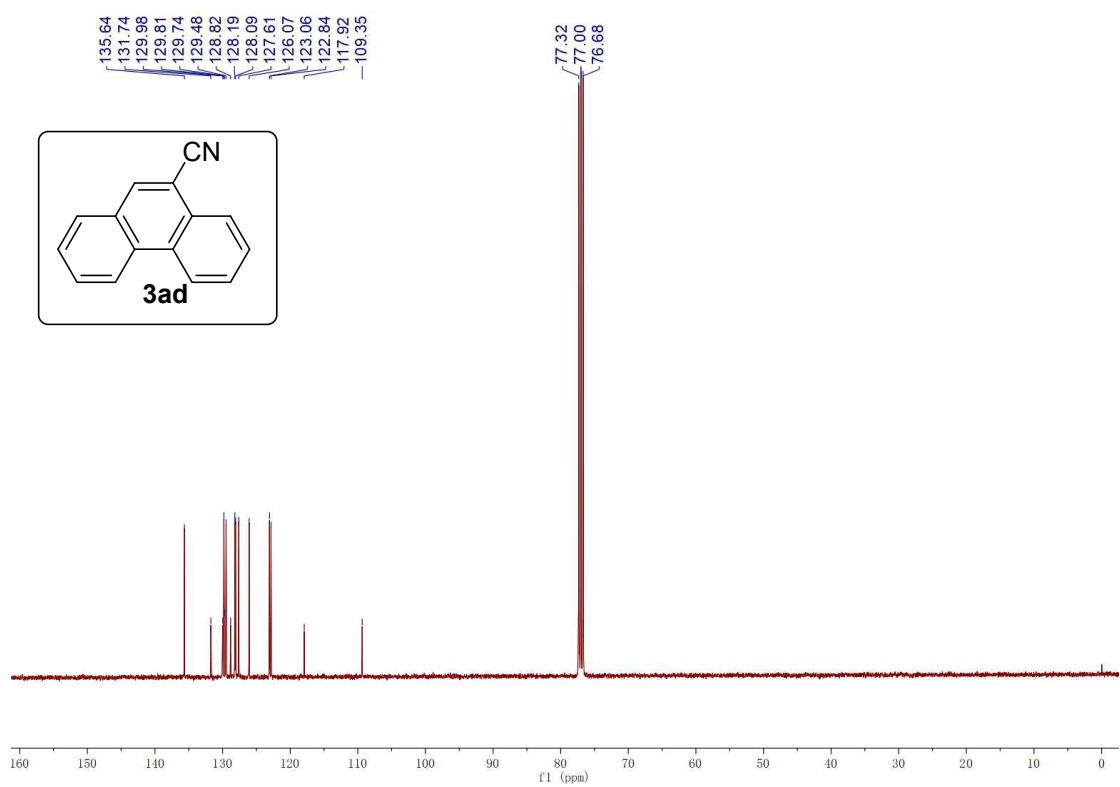

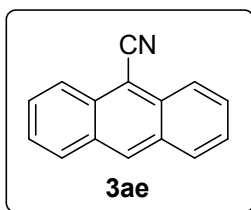

8.62  
8.39  
8.37  
8.05  
8.03  
7.71  
7.69  
7.67  
7.58  
7.54

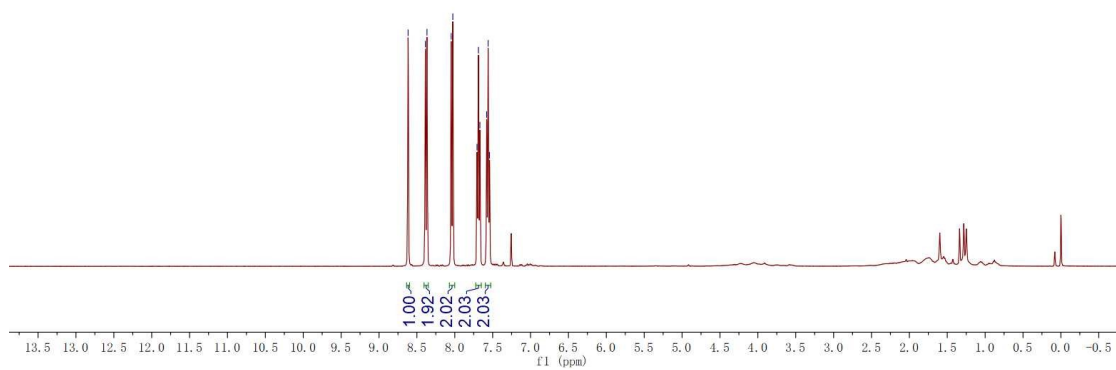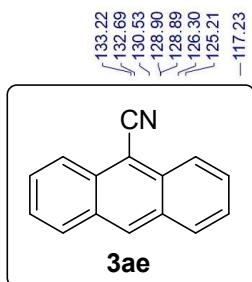

133.22  
132.69  
130.53  
128.90  
128.89  
126.30  
125.21  
117.23

105.33

77.32  
77.00  
76.68

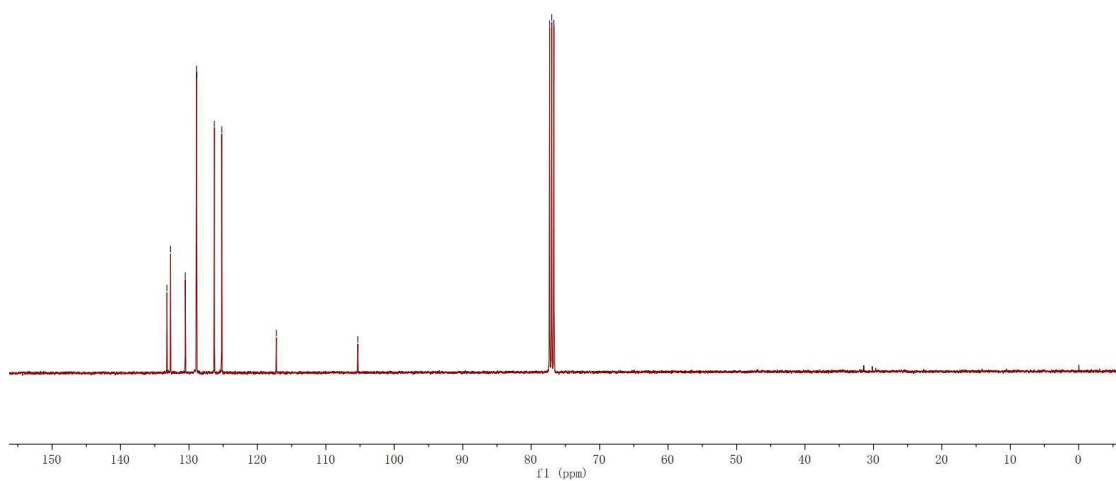

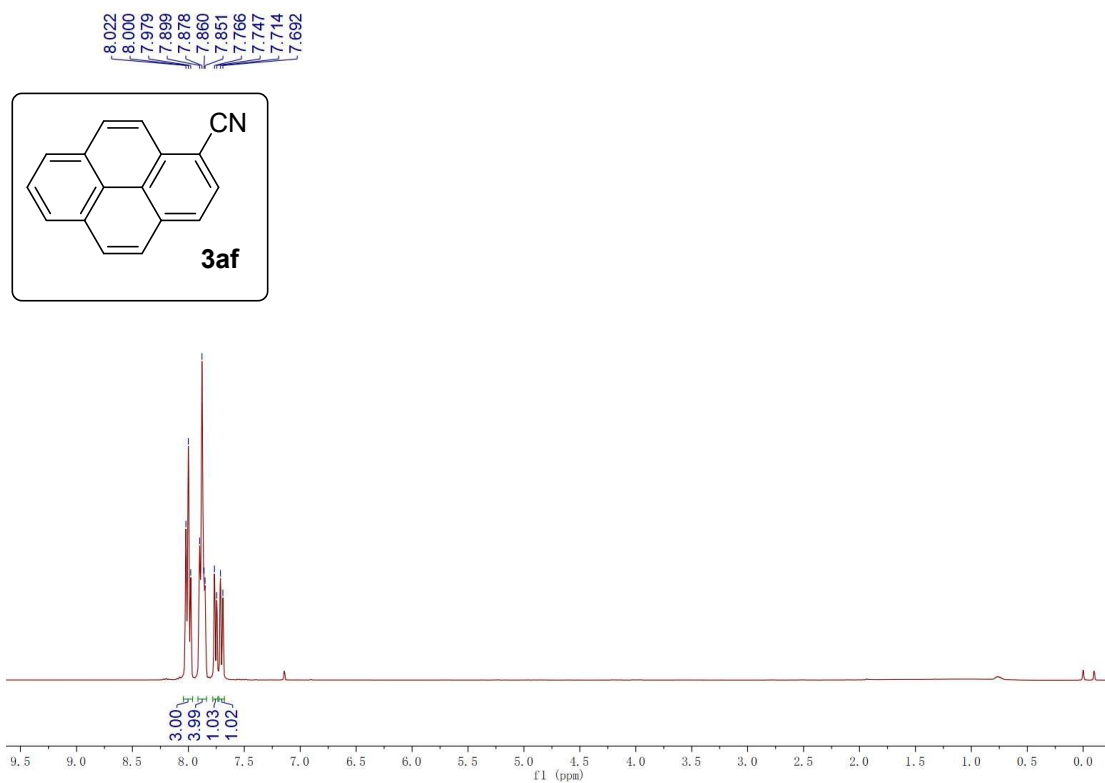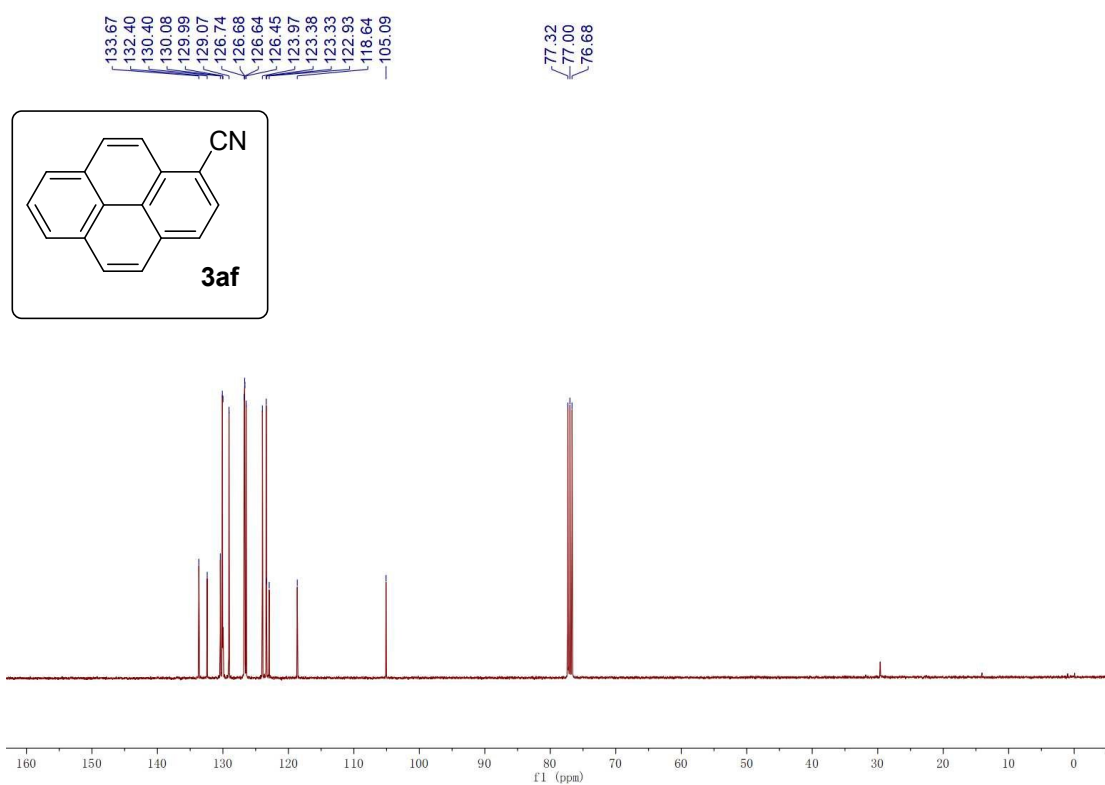

Supplement: d2gc04506k1.pdf [file d2gc04506k1.pdf]
